# Supplementary material for: Factors associated with quality of life and work ability among Finnish municipal employees: a cross-sectional study
Source: PubMed Central journal article supplement — BMJ Open. 2020 Sep 23;10(9):e035544. doi: 10.1136/bmjopen-2019-035544 (PMC7513561; doi:10.1136/bmjopen-2019-035544), 2020-09-23
Supplement: bmjopen-2019-035544.draft_revisions.pdf [file bmjopen-2019-035544.draft_revisions.pdf]

# BMJ Open

BMJ Open is committed to open peer review. As part of this commitment we make the peer review history of every article we publish publicly available.

When an article is published we post the peer reviewers' comments and the authors' responses online. We also post the versions of the paper that were used during peer review. These are the versions that the peer review comments apply to.

The versions of the paper that follow are the versions that were submitted during the peer review process. They are not the versions of record or the final published versions. They should not be cited or distributed as the published version of this manuscript.

BMJ Open is an open access journal and the full, final, typeset and author-corrected version of record of the manuscript is available on our site with no access controls, subscription charges or pay-per-view fees (<http://bmjopen.bmj.com>).

If you have any questions on BMJ Open's open peer review process please email [info.bmjopen@bmj.com](mailto:info.bmjopen@bmj.com)

# BMJ Open

## Predictors of quality of life and work ability among Finnish municipal employees: a cross-sectional study

|                               |                                                                                                                                                                                                                                                                                                                                                                                                                                                                         |
|-------------------------------|-------------------------------------------------------------------------------------------------------------------------------------------------------------------------------------------------------------------------------------------------------------------------------------------------------------------------------------------------------------------------------------------------------------------------------------------------------------------------|
| Journal:                      | <i>BMJ Open</i>                                                                                                                                                                                                                                                                                                                                                                                                                                                         |
| Manuscript ID                 | bmjopen-2019-035544                                                                                                                                                                                                                                                                                                                                                                                                                                                     |
| Article Type:                 | Original research                                                                                                                                                                                                                                                                                                                                                                                                                                                       |
| Date Submitted by the Author: | 05-Nov-2019                                                                                                                                                                                                                                                                                                                                                                                                                                                             |
| Complete List of Authors:     | Bergman, Elina; University of Turku, General Practice<br>Löyttyniemi, Eliisa; University of Turku, Department of Biostatistics<br>Myllyntausta, Saana; University of Turku, Department of Public Health<br>Rautava, Paivi; Turku University Hospital, Clinical Research Centre;<br>University of Turku Faculty of Medicine, Department of Public Health<br>Korhonen, Päivi; Turun Yliopisto, General Practice; Central Satakunta<br>Health Federation of Municipalities |
| Keywords:                     | PRIMARY CARE, OCCUPATIONAL & INDUSTRIAL MEDICINE, PREVENTIVE MEDICINE                                                                                                                                                                                                                                                                                                                                                                                                   |
|                               |                                                                                                                                                                                                                                                                                                                                                                                                                                                                         |

SCHOLARONE™  
Manuscripts

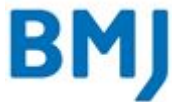

I, the Submitting Author has the right to grant and does grant on behalf of all authors of the Work (as defined in the below author licence), an exclusive licence and/or a non-exclusive licence for contributions from authors who are: i) UK Crown employees; ii) where BMJ has agreed a CC-BY licence shall apply, and/or iii) in accordance with the terms applicable for US Federal Government officers or employees acting as part of their official duties; on a worldwide, perpetual, irrevocable, royalty-free basis to BMJ Publishing Group Ltd ("BMJ") its licensees and where the relevant Journal is co-owned by BMJ to the co-owners of the Journal, to publish the Work in this journal and any other BMJ products and to exploit all rights, as set out in our [licence](#).

The Submitting Author accepts and understands that any supply made under these terms is made by BMJ to the Submitting Author unless you are acting as an employee on behalf of your employer or a postgraduate student of an affiliated institution which is paying any applicable article publishing charge ("APC") for Open Access articles. Where the Submitting Author wishes to make the Work available on an Open Access basis (and intends to pay the relevant APC), the terms of reuse of such Open Access shall be governed by a Creative Commons licence – details of these licences and which [Creative Commons](#) licence will apply to this Work are set out in our licence referred to above.

Other than as permitted in any relevant BMJ Author's Self Archiving Policies, I confirm this Work has not been accepted for publication elsewhere, is not being considered for publication elsewhere and does not duplicate material already published. I confirm all authors consent to publication of this Work and authorise the granting of this licence.

1  
2  
3  
4  
5  
6 **PREDICTORS OF QUALITY OF LIFE AND WORK ABILITY AMONG FINNISH MUNICIPAL EMPLOYEES: A**  
7  
8 **CROSS-SECTIONAL STUDY**  
9

10  
11 Elina Bergman, MD<sup>a</sup>, Eliisa Löyttyniemi, MSc<sup>b</sup>, Saana Myllyntausta, MA<sup>c</sup>, Päivi Rautava, MD, PhD<sup>c d</sup>

12  
13  
14  
15 and Päivi E. Korhonen, MD, PhD <sup>a e</sup>  
16

17  
18 <sup>a</sup> Institute of Clinical Medicine, Department of General Practice, University of Turku and Turku  
19 University Hospital, Turku, Finland. <sup>b</sup> Department of Biostatistics, University of Turku, Turku,  
20 Finland. <sup>c</sup> Department of Public Health, University of Turku, and Turku University Hospital, Turku,  
21 Finland. <sup>d</sup> Clinical Research Centre, Turku University Hospital, Turku, Finland. <sup>e</sup> Central Satakunta  
22 Health Federation of Municipalities, Harjavalta, Finland.  
23  
24  
25  
26  
27  
28  
29  
30  
31  
32  
33  
34  
35  
36  
37  
38

39 Corresponding author:

40  
41  
42 Elina Bergman  
43

44  
45 Address:

46  
47  
48 Department of General Practice, Joukahaisenkatu 3-5, FI-20014 TURUN YLIOPISTO, FINLAND  
49

50  
51 Telephone: +358 50 307 4436  
52

53  
54 E-mail: [elkaro@utu.fi](mailto:elkaro@utu.fi)  
55

56  
57 Word count: 3840  
58  
59  
60

**ABSTRACT**

**Objectives:** Quality of life (QoL) and work ability are elementary parts in defining the well-being of an employed person. The aim of this study was to demonstrate the predictors of QoL and self-reported work ability among public sector employees, while taking into account several confounding factors, including sleep quality, occupational stress and psychosocial risk factors.

**Methods:** A cross-sectional study was conducted in Finland among 710 employees (89% women, mean age 49 [SD = 10] years) from ten municipal work units in 2015. Information about the participants was collected by physical examination, self-administered questionnaire and from medical history. QoL was assessed with the EUROHIS-QOL 8-item index and work ability with the Work Ability Score (WAS).

**Results:** The EUROHIS-QOL mean score among all participants was 4.07 (95% CI 4.03–4.11). QoL was positively associated with good sleep quality, cohabiting, university-level education, and lower BMI, and negatively associated with occupational stress, depression and/or anxiety and disease burden. Work ability was reported good or excellent by 80% of the participants and the WAS mean score among all participants was 8.31 (95% CI 8.21–8.41). Work ability was positively associated with good sleep quality, younger age, lower BMI and university-level education, and negatively associated with occupational stress and disease burden.

**Conclusions:** Occupational stress and self-reported sleep quality were powerful predictors of both QoL and work ability among Finnish public sector employees. These findings highlight the need for screening and handling of work stress and sleep problems in occupational and primary health care.

**KEYWORDS**

Quality of life, Work ability, Occupational health, Sleep quality, Occupational stress

## STRENGTHS AND LIMITATIONS OF THIS STUDY

- Several aspects affecting the employees' quality of life and work ability could be taken into account.
- The participants completed all questionnaires at home before the examination was performed.
- Any causality cannot be determined due to the cross-sectional nature of the study.
- The initial response rate in the first part of the study in 2014 was only 32.5% and 84.9% of them attended this follow-up study in 2015.

## INTRODUCTION

Quality of life (QoL) and other subjectively assessed metrics have in recent years become important outcomes evaluated in studies concerning diseases, therapies or care. Several assessment tools have been developed to measure well-being from the patient's point of view, and those tools have proven to be reliable in defining significant outcomes.[1–4] In our previous study, self-reported sleep quality was observed to be an even more powerful predictor of QoL than ideal cardiovascular health metrics among public sector employees.[5] Furthermore, the association between poor sleep quality and impaired QoL has been demonstrated among patients with sleep disorders and other medical conditions [6–9], and self-reported sleep quality has been shown to predict QoL in higher education students.[10] Poor sleep has also been associated with poorer work ability [11], and sleep problems have been linked to an increased rate of sickness absence.[12] Further, QoL seems to be closely related to work ability [13,14], but few studies have evaluated QoL and self-reported work ability simultaneously among apparently healthy, working-age individuals.

Based on our previous study, we focused in the present work first on self-reported sleep quality and its role in characterizing our study population. The aim of this study was to demonstrate the

1  
2  
3 predictors of QoL and self-reported work ability in a non-clinical sample of public sector employees,  
4  
5 while taking into account several confounding factors, including psychosocial risk factors and  
6  
7 occupational stress. We wanted to use short, subjective and user-friendly tools for the assessment of  
8  
9 sleep quality, QoL, and work ability. We hypothesized that self-reported sleep quality would be a  
10  
11 significant predictor of both QoL and work ability in this population of apparently healthy, active  
12  
13 work force.  
14  
15  
16  
17  
18  
19

## 20 **PARTICIPANTS AND METHODS**

### 21 **Participants**

22  
23  
24 This cross-sectional study was part of the PORTAAT (PORi To Aid Against Threats) study conducted  
25  
26 among employees of the city of Pori (83,497 inhabitants in 2014) in South-Western Finland in 2014  
27  
28 and 2015. The participating work units were selected by the chief of the Welfare Unit of Pori.  
29  
30 Invitations to participate and information of the study were sent to employees via e-mail by the  
31  
32 managers of the selected ten work units (total number of employees 2,570). The employees willing  
33  
34 to participate contacted the study contact person at their work unit, who then sent their contact  
35  
36 information to the study nurse. There were no exclusion criteria. A total of 836 employees (104  
37  
38 males, 732 females) participated in the study in 2014 and 710 of them (79 males, 631 females)  
39  
40 attended the follow-up visit in 2015. The initial response rate in the first part of the study in 2014  
41  
42 was 32.5%, and 84.9% of these respondents attended the follow-up study in 2015. In the present  
43  
44 work, we used the data from the year 2015 because complete information about psychosocial risk  
45  
46 factors was available only from that year. The gender distribution of the study participants  
47  
48 corresponds to the standard gender distribution of the employees of Pori. The participants'  
49  
50 occupations included librarians, museum employees, janitors, IT workers, social workers, nurses,  
51  
52 physicians, administrative officials, and general office staff.  
53  
54  
55  
56  
57  
58  
59  
60

## Quality of life

QoL was assessed with the EUROHIS-QOL 8-item index.[15] This is a shortened version of the WHOQOL-Bref scale, a widely used instrument for the assessment of generic QoL.[16,17] The domains in both questionnaires are the general, physical, psychological, social and environmental aspects of QoL. The EUROHIS-QOL instrument has been validated in several European countries.[2] The participants of the present study answered the questions at home before the study visits. Every question was scored from 1 to 5 (1 for very poor and 5 for very good). All scores were then added together and divided by 8 (the sum of the questions) to obtain the EUROHIS-QOL mean score.[2]

## Work-related measures

Work ability was assessed with the question “What is your current work ability compared to your lifetime best?”. This is the first item of the widely used Work Ability Index (WAI) [3], referred to as the Work Ability Score (WAS). It has a 0–10 response scale, where 0 stands for “completely unable to work” and 10 stands for “work ability at its best”. Work ability was considered poor for scores of 0–5, moderate for scores of 6–7, good for scores of 8–9, and excellent for a score of 10 points, based on the same values that have been used in the WAI.[18] Work-related stress was evaluated with Bergen Burnout Indicator 15 (BBI-15).[19] The BBI-15 measures three dimensions of burnout: exhaustion, cynicism, and reduced professional efficacy. Responses are rated on a 6-point Likert-type scale (1 = totally disagree, 6 = totally agree). In this work, we used the total score from all three dimensions, which can vary from 15 to 90, with higher scores indicating more severe burnout symptoms. Burnout symptoms are in this indicator classified as severe, moderate, mild, and no burnout, with specific threshold values according to gender and age.[19] We assessed burnout as a binary variable where all scores from mild to severe burnout were set to indicate the presence of burnout symptoms.



### **Sleep-related measures**

Self-reported sleep quality was assessed with the question “During the past month, how would you rate your sleep quality overall?” (very good, good, poor, or very poor). This is the subjective sleep quality question used in the Pittsburgh Sleep Quality Index (PSQI).[4] In the analyses, the two lowest classes of sleep quality were combined and set to indicate poor sleep quality. Sleep duration was assessed with the question “During the past month, how many hours of sleep did you normally get at night?”. The participants were asked to answer the question in a free field, and sleep duration was handled as a continuous variable in the analyses.

### **Psychosocial measures**

Depressive symptoms were assessed with the Major Depression Inventory (MDI) questionnaire.[20] This inventory can be used as a diagnostic tool for major depression (according to DSM IV diagnostic criteria) as well as an assessment tool for severity of depressive symptoms.[20,21] To assess severity of depressive symptoms, a total score of 0–20 is considered as no symptoms, 21–25 as mild symptoms, 26–30 as moderate symptoms, and 31–50 as severe depressive symptoms. In this work, the diagnostic tool was used to determine whether a person had depression or not. Anxiety was assessed with the General Anxiety Disorder 7-item Scale (GAD-7).[22] In the GAD-7, a total score of 0–4 is considered as no anxiety, 5–9 as mild anxiety, 10–14 as moderate anxiety, and 15–21 as severe anxiety. A total score of 10 was used as a cut-off point when a binary variable for anxiety was used in our analyses. This cut-off is recommended by the developers of the GAD-7 questionnaire.[22]

### **Other measures**

Smoking status was assessed by a questionnaire. Non-smoking was defined as having never smoked or having quit smoking >12 months ago. Height and weight were measured by a study nurse with subjects in standing position without shoes and outer garments. Weight was measured to the

1  
2  
3 nearest 0.1 kg with calibrated scales and height to the nearest 0.5 cm with a wall-mounted  
4  
5 stadiometer. BMI was calculated as weight (kg) divided by the square of height (m<sup>2</sup>). Information  
6  
7 concerning diseases diagnosed by a physician, medication used regularly, marital status (cohabiting  
8  
9 or not), working times (3-shift work or not) and education level (vocational school, college-level  
10  
11 education, or university-level education) was gathered using self-administered questionnaires and  
12  
13 medical records. Alcohol consumption was assessed using the 3-item Alcohol Use Disorders  
14  
15 Identification Test (AUDIT-C) [23] with a cut-off of 5 points for harmful alcohol use in women and 6  
16  
17 points in men.[24,25] Disease burden was defined as having at least one chronic disease diagnosed  
18  
19 by a physician.  
20  
21  
22

### 23 24 **Statistical analysis**

25  
26  
27 Continuous variables are presented with means and standard deviations (SD) together with 95%  
28  
29 confidence intervals (CI). Categorical variables are summarized with counts and percentages (%).

30  
31 Association between sleep quality and background variables was evaluated using a chi-square test or  
32  
33 a one-way analysis of variance (ANOVA).  
34  
35

36  
37 Association between QoL / work ability and background variables including sleep quality were  
38  
39 examined first one by one (univariate approach), with one-way analysis of variance or with linear  
40  
41 regression. A multivariable model was then built up, and age, gender and all factors with significant  
42  
43 association with QoL and / or work ability in the univariate approach were entered into the model.  
44  
45

46 The method used was linear model and assumptions were checked using studentized residuals.  
47  
48

49 All statistical tests were performed as 2-sided, with a significance level set at 0.05. The analyses were  
50  
51 performed using an SAS System version 9.4 for Windows (SAS Institute Inc., Cary, NC, USA).  
52  
53

### 54 **Patient and public involvement**

55  
56  
57 Information events about the PORTAAT Study with guidance for the management of physical and  
58  
59 psychosocial well-being were arranged for the employees of the selected work units. All participants  
60

1  
2  
3 were given personalized lifestyle counselling at the study visits. The chief of the Welfare Unit of Pori  
4  
5 has been informed regularly about the published study results. The participants of this study were  
6  
7 not involved in the design or development of the study.  
8  
9

## 10 **RESULTS**

11  
12  
13 The study cohort consisted of 710 employees with a mean age of 49 years (SD 10, range 20 – 68),  
14  
15 89% of whom were female.  
16  
17

### 18 **Characteristics of the participants and sleep quality**

19  
20  
21 Table 1 displays the basic characteristics of the participants, classified according to their sleep  
22  
23 quality. Sleep quality was reported very good by 14.5%, good by 62.1%, poor by 21.2%, and very  
24  
25 poor by 2.1% of the participants. Poor and very poor sleep quality were combined and set to indicate  
26  
27 poor sleep quality in the analyses. Self-reported sleep quality was negatively associated with disease  
28  
29 burden, prevalence of depression and severity of depressive symptoms, anxiety, and work stress,  
30  
31 and positively associated with QoL and work ability. Better sleep quality was associated with longer  
32  
33 sleep duration ( $p < 0.0001$ ). There were only five participants with a previously diagnosed obstructive  
34  
35 sleep apnoea and three with restless legs syndrome. During the past month, 14.8% of the  
36  
37 participants had used sleep medication at least occasionally. The use of sleep medication was more  
38  
39 common in women (15.1% in women vs. 12.6% in men,  $p = 0.038$ ).  
40  
41  
42  
43  
44

45 Only 9 (1.3%) of the participants were diagnosed as depressive according to the MDI diagnostic tool.  
46  
47 All of them were also classified as anxious (GAD-7 score  $> 10$ ). These two psychosocial risk factors  
48  
49 were combined for multivariable analyses.  
50  
51  
52  
53  
54  
55  
56  
57  
58  
59  
60

Table 1

Characteristics of the participants according to self-reported sleep quality

|                                     | Total                | Sleep quality        |                      |                      | p-value |
|-------------------------------------|----------------------|----------------------|----------------------|----------------------|---------|
|                                     |                      | Very good (n=103)    | Good (n=441)         | Poor (n=166)         |         |
| Age mean, years (SD)                | 49.0 (9.7)           | 47.5 (10.6)          | 49.1 (9.7)           | 49.8 (9.2)           | 0.072   |
| Gender, n (%)                       |                      |                      |                      |                      | 0.10    |
| Female                              | 631 (88.9)           | 85 (13.5)            | 397 (62.9)           | 149 (23.6)           |         |
| Male                                | 79 (11.1)            | 18 (22.8)            | 44 (55.7)            | 17 (21.5)            |         |
| Education, n (%)                    |                      |                      |                      |                      | 0.36    |
| Vocational school                   | 21 (3)               | 4 (19.1)             | 14 (66.7)            | 3 (14.3)             |         |
| College-level                       | 361 (51.6)           | 53 (14.7)            | 232 (64.3)           | 76 (21.1)            |         |
| University-level                    | 318 (45.4)           | 45 (14.2)            | 188 (59.1)           | 85 (26.7)            |         |
| Co-habiting, n (%)                  |                      |                      |                      |                      | 0.64    |
| Yes                                 | 575 (81.2)           | 83 (14.4)            | 353 (61.4)           | 139 (24.2)           |         |
| No                                  | 133 (18.8)           | 20 (15.0)            | 86 (64.7)            | 27 (20.3)            |         |
| 3-shift work, n (%)                 |                      |                      |                      |                      | 0.41    |
| Yes                                 | 76 (10.9)            | 15 (19.7)            | 44 (57.9)            | 17 (23.4)            |         |
| No                                  | 620 (89.1)           | 87 (14.0)            | 386 (57.9)           | 147 (23.7)           |         |
| Smoking, n (%)                      |                      |                      |                      |                      | 0.45    |
| Yes                                 | 64 (9.0)             | 9 (14.1)             | 44 (68.8)            | 11 (17.2)            |         |
| No                                  | 645 (91.0)           | 94 (14.6)            | 396 (61.4)           | 155 (24.0)           |         |
| Harmful alcohol consumption, n (%)  |                      |                      |                      |                      | 0.55    |
| Yes                                 | 101 (14.2)           | 18 (17.8)            | 59 (58.4)            | 24 (23.8)            |         |
| No                                  | 609 (85.8)           | 85 (14.0)            | 382 (62.7)           | 142 (23.3)           |         |
| Body mass index mean (95% CI)       | 26.8 (26.42 - 27.13) | 26.4 (25.50 - 27.25) | 27.0 (26.54 - 27.46) | 26.5 (25.72 - 27.24) | 0.92    |
| Disease burden <sup>a</sup> , n (%) |                      |                      |                      |                      | 0.0016  |
| Yes                                 | 468 (65.9)           | 55 (11.8)            | 289 (61.8)           | 124 (26.5)           |         |
| No                                  | 242 (34.1)           | 48 (19.8)            | 152 (62.8)           | 42 (17.4)            |         |

1  
2  
3  
4  
5  
6  
7  
8  
9  
10  
11  
12  
13  
14  
15  
16  
17  
18  
19  
20  
21  
22  
23  
24  
25  
26  
27  
28  
29  
30  
31  
32  
33  
34  
35  
36  
37  
38  
39  
40  
41  
42  
43  
44  
45  
46

|                                    |                    |                    |                     |                    |         |
|------------------------------------|--------------------|--------------------|---------------------|--------------------|---------|
| Depression (MDI), n (%)            |                    |                    |                     |                    | 0.016   |
| Yes                                | 9 (1.3)            | 0 (0.0)            | 3 (33.3)            | 6 (66.7)           |         |
| No                                 | 701 (98.7)         | 103 (14.7)         | 438 (62.5)          | 160 (22.8)         |         |
| MDI mean score (95% CI)            | 5.0 (4.57-5.43)    | 2.4 (1.75 - 2.97)  | 4.1 (3.59 - 4.51)   | 9.2 (8.09 - 10.27) | <0.0001 |
| Level of anxiety (GAD-7), n (%)    |                    |                    |                     |                    | <0.0001 |
| No anxiety                         | 534 (75.2)         | 92 (17.2)          | 343 (64.2)          | 99 (18.5)          |         |
| Mild anxiety                       | 143 (20.1)         | 10 (7.0)           | 85 (59.4)           | 48 (33.6)          |         |
| Moderate anxiety                   | 26 (3.7)           | 1 (3.9)            | 10 (38.5)           | 15 (57.7)          |         |
| Severe anxiety                     | 7 (1.0)            | 0 (0.0)            | 3 (42.9)            | 4 (57.1)           |         |
| BBI15 mean total score (95% CI)    | 31.6 (30.82-32.41) | 28.3 (26.43-30.23) | 31.0 (30.05- 31.99) | 35.4 (33.60-37.20) | <0.0001 |
| Occupational stress (BBI15), n (%) |                    |                    |                     |                    | <0.0001 |
| No stress                          | 592 (89.4)         | 97 (16.4)          | 374 (63.2)          | 121 (20.4)         |         |
| Stress                             | 70 (10.6)          | 3 (4.3)            | 38 (54.3)           | 29 (41.4)          |         |
| Sleep duration mean (95% CI)       | 7.00 (6.93 - 7.07) | 7.50 (7.35 - 7.66) | 7.17 (7.09 - 7.24)  | 6.23 (6.09 - 6.38) | <0.0001 |
| EUROHIS mean score (95% CI)        | 4.07 (4.03 - 4.11) | 4.38 (4.30 - 4.45) | 4.09 (4.05 - 4.14)  | 3.83 (3.75 - 3.91) | <0.0001 |
| WAS mean score (95% CI)            | 8.31 (8.21-8.41)   | 8.99 (8.78 - 9.20) | 8.34 (8.22 - 8.46)  | 7.80 (7.55 - 8.04) | <0.0001 |
| Level of work ability (WAS), n (%) |                    |                    |                     |                    | <0.0001 |
| Poor                               | 27 (3.8)           | 1 (3.7)            | 12 (44.4)           | 14 (51.9)          |         |
| Moderate                           | 114 (16.1)         | 3 (2.6)            | 69 (60.5)           | 42 (36.8)          |         |
| Good                               | 459 (64.9)         | 61 (13.3)          | 298 (64.9)          | 100 (21.8)         |         |
| Excellent                          | 107 (15.1)         | 37 (34.6)          | 60 (56.1)           | 10 (9.4)           |         |

<sup>a</sup> At least one chronic disease diagnosed by a physician, BBI15 = Bergen Burnout Indicator 15, CI = Confidence Interval, EUROHIS = EUROHIS-QOL 8-item index, GAD-7= General Anxiety Disorder 7-item Scale, MDI = Major Depression Inventory, SD = Standard deviation, WAS = Work Ability Score

### Quality of life

As seen in Table 2, the EUROHIS-QOL mean score among all participants was 4.07 (SD 0.51) with no significant difference between genders ( $p=0.94$ ). In the univariate approach, QoL was positively associated with good sleep quality, university-level education, co-habiting, lower BMI and younger age, and negatively associated with occupational stress, depression, anxiety and disease burden.

In the multiway analysis of co-variance, QoL was positively associated with good sleep quality, co-habiting, university-level education and lower BMI, and negatively associated with occupational stress, depression and/or anxiety and disease burden (Table 2).

Table 2

Predictors of quality of life in a univariate approach and in a multivariable model. EUROHIS means/slope together with 95% CI are based on model estimates.

|                             | Univariate                 |                         |         | Multivariable                          |                         |         |    |         |
|-----------------------------|----------------------------|-------------------------|---------|----------------------------------------|-------------------------|---------|----|---------|
|                             | EUROHIS total mean / slope | 95% Confidence Interval | p-value | EUROHIS total model based mean / slope | 95% Confidence Interval | F-value | DF | p-value |
| Age                         | -0.0040                    | (-0.0079, -0.00008)     | 0.046   | -0.00028                               | -0.0042 - 0.0036        | 0.02    | 1  | 0.89    |
| Gender                      |                            |                         | 0.94    |                                        |                         | 0.00    | 1  | 0.99    |
| Female                      | 4.07                       | 4.03 - 4.11             |         | 3.54                                   | 3.38 - 3.69             |         |    |         |
| Male                        | 4.07                       | 3.96 - 4.18             |         | 3.54                                   | 3.36 - 3.72             |         |    |         |
| Education                   |                            |                         | 0.036   |                                        |                         | 4.17    | 2  | 0.016   |
| Vocational school           | 3.83                       | 3.61 - 4.05             |         | 3.37                                   | 3.11 - 3.62             |         |    |         |
| College-level               | 4.05                       | 4.00 - 4.11             |         | 3.59                                   | 3.44 - 3.74             |         |    |         |
| University-level            | 4.11                       | 4.05 - 4.16             |         | 3.66                                   | 3.51 - 3.81             |         |    |         |
| Co-habiting                 |                            |                         | 0.011   |                                        |                         | 5.72    | 1  | 0.017   |
| Yes                         | 4.09                       | 4.05 - 4.13             |         | 3.59                                   | 3.43 - 3.75             |         |    |         |
| No                          | 3.97                       | 3.88 - 4.06             |         | 3.48                                   | 3.31 - 3.66             |         |    |         |
| Smoking                     |                            |                         | 0.39    |                                        |                         |         |    |         |
| Yes                         | 4.02                       | 3.89 - 4.14             |         |                                        |                         |         |    |         |
| No                          | 4.08                       | 4.38 - 4.12             |         |                                        |                         |         |    |         |
| Harmful alcohol consumption |                            |                         | 0.33    |                                        |                         |         |    |         |
| Yes                         | 4.12                       | 4.02 - 4.22             |         |                                        |                         |         |    |         |
| No                          | 4.06                       | 4.02 - 4.11             |         |                                        |                         |         |    |         |
| Body mass index             | -0.020                     | (-0.028, -0.012)        | <0.0001 | -0.018                                 | (-0.025, -0.011)        | 23.91   | 1  | <0.0001 |
| Disease burden <sup>a</sup> |                            |                         | <0.0001 |                                        |                         | 13.35   | 1  | 0.0003  |
| Yes                         | 3.99                       | 3.95 - 4.04             |         | 3.47                                   | 3.31 - 3.63             |         |    |         |
| No                          | 4.22                       | 4.16 - 4.29             |         | 3.61                                   | 3.44 - 3.77             |         |    |         |
| Depression <sup>b</sup>     |                            |                         | <0.0001 |                                        |                         |         |    |         |
| Yes                         | 3.07                       | 2.74 - 3.39             |         |                                        |                         |         |    |         |

|    |                                         |      |             |         |      |             |       |         |
|----|-----------------------------------------|------|-------------|---------|------|-------------|-------|---------|
| 1  |                                         |      |             |         |      |             |       |         |
| 2  |                                         |      |             |         |      |             |       |         |
| 3  | No                                      | 4.08 | 4.05 - 4.12 |         |      |             |       |         |
| 4  | Level of anxiety <sup>c</sup>           |      |             | <0.0001 |      |             |       |         |
| 5  | No                                      | 4.19 | 4.16 - 4.23 |         |      |             |       |         |
| 6  | Mild                                    | 3.75 | 3.67 - 3.82 |         |      |             |       |         |
| 7  | Moderate                                | 3.47 | 3.29 - 3.64 |         |      |             |       |         |
| 8  | Severe                                  | 3.66 | 3.32 - 4.00 |         |      |             |       |         |
| 9  | Depression and/or anxiety <sup>bd</sup> |      |             |         |      | 13.92       | 2     | <0.0001 |
| 10 | No depression/ No                       |      |             |         | 3.89 | 3.77 - 4.00 |       |         |
| 11 | anxiety                                 |      |             |         |      |             |       |         |
| 12 | Only anxiety                            |      |             |         | 3.59 | 3.36 - 3.82 |       |         |
| 13 | Depression and anxiety                  |      |             |         | 3.14 | 2.81 - 3.46 |       |         |
| 14 | Occupational stress <sup>e</sup>        |      |             | <0.0001 |      |             | 39.30 | 1       |
| 15 | Yes                                     | 3.63 | 3.51 - 3.74 |         | 3.35 | 3.18 - 3.53 |       | <0.0001 |
| 16 | No                                      | 4.13 | 4.09 - 4.17 |         | 3.72 | 3.56 - 3.88 |       |         |
| 17 | 3-shift work                            |      |             | 0.089   |      |             | 0.55  | 1       |
| 18 | Yes                                     | 4.16 | 4.02 - 4.10 |         | 3.56 | 3.37 - 3.74 |       | 0.46    |
| 19 | No                                      | 4.06 | 4.05 - 4.28 |         | 3.52 | 3.36 - 3.67 |       |         |
| 20 | Self-reported sleep quality             |      |             | <0.0001 |      |             | 22.02 | 2       |
| 21 | Very good                               | 4.38 | 4.30 - 4.45 |         | 3.74 | 3.56 - 3.92 |       | <0.0001 |
| 22 | Good                                    | 4.05 | 4.05 - 4.14 |         | 3.53 | 3.36 - 3.69 |       |         |
| 23 | Poor                                    | 3.83 | 3.75 - 3.91 |         | 3.34 | 3.18 - 3.51 |       |         |
| 24 |                                         |      |             |         |      |             |       |         |
| 25 |                                         |      |             |         |      |             |       |         |
| 26 |                                         |      |             |         |      |             |       |         |
| 27 |                                         |      |             |         |      |             |       |         |
| 28 |                                         |      |             |         |      |             |       |         |
| 29 |                                         |      |             |         |      |             |       |         |

<sup>a</sup> At least one chronic disease diagnosed by a physician, <sup>b</sup> Defined by Major Depression Inventory (MDI) diagnostic tool (DSM IV), <sup>c</sup> General Anxiety Disorder 7-item Scale (GAD-7), <sup>d</sup> General Anxiety Disorder 7-item Scale (GAD-7), moderate or severe anxiety, <sup>e</sup> Bergen Burnout Indicator 15 (BBI15), at least mild occupational stress, CI = Confidence Interval, DF = Degrees of freedom, EUROHIS = EUROHIS-QOL 8-item index



### Work ability

Work ability was reported excellent by 15.2%, good by 64.9%, moderate by 16.1% and poor by 3.8% of the participants. The WAS mean score among all participants was 8.31 (SD 1.37), and the median was 9.0 (Q1:8.0, Q3:9.0). There was no difference in work ability between genders ( $p=0.11$ ). In the univariate approach, work ability was positively associated with good sleep quality, younger age, lower BMI, university-level education, female gender, and 3-shift work, and negatively associated with disease burden, depression, anxiety and occupational stress.

In the multiway analysis of co-variance, work ability was positively associated with good sleep quality, younger age, lower BMI, and university-level education, and negatively associated with occupational stress and disease burden (Table 3).

Table 3

Predictors of work ability in a univariate approach and in a multivariable model. WAS means/slope together with 95% CI are based on model estimates.

|                             | Univariate           |                         |         | Multivariable                    |                         |         |    |         |
|-----------------------------|----------------------|-------------------------|---------|----------------------------------|-------------------------|---------|----|---------|
|                             | WAS estimate / slope | 95% Confidence Interval | p-value | WAS model based estimate / slope | 95% Confidence Interval | F-value | DF | p-value |
| Age                         | -0.019               | (-0.029, -0.0090)       | 0.0002  | -0.012                           | (-0.022, -0.0018)       | 5.34    | 1  | 0.021   |
| Gender                      |                      |                         | 0.027   |                                  |                         | 3.36    | 1  | 0.067   |
| Female                      | 8.35                 | 8.24 - 8.46             |         | 7.83                             | 7.43 - 8.23             |         |    |         |
| Male                        | 7.99                 | 7.68 - 8.29             |         | 7.56                             | 7.09 - 8.04             |         |    |         |
| Education                   |                      |                         | 0.0079  |                                  |                         | 4.74    | 2  | 0.0091  |
| Vocational school           | 7.90                 | 7.30 - 8.50             |         | 7.42                             | 6.76 - 8.07             |         |    |         |
| College-level               | 8.18                 | 8.04 - 8.32             |         | 7.70                             | 7.32 - 8.09             |         |    |         |
| University-level            | 8.48                 | 8.33 - 8.63             |         | 7.80                             | 7.58 - 8.37             |         |    |         |
| Co-habiting                 |                      |                         | 0.91    |                                  |                         | 0.04    | 1  | 0.85    |
| Yes                         | 8.31                 | 8.20 - 8.42             |         | 7.69                             | 7.27 - 8.10             |         |    |         |
| No                          | 8.30                 | 8.06 - 8.53             |         | 7.71                             | 7.26 - 8.18             |         |    |         |
| Smoking                     |                      |                         | 0.19    |                                  |                         |         |    |         |
| Yes                         | 8.10                 | 7.76 - 8.44             |         |                                  |                         |         |    |         |
| No                          | 8.33                 | 8.23 - 8.44             |         |                                  |                         |         |    |         |
| Harmful alcohol consumption |                      |                         | 0.35    |                                  |                         |         |    |         |
| Yes                         | 8.43                 | 8.18 - 8.40             |         |                                  |                         |         |    |         |
| No                          | 8.30                 | 8.16 - 8.70             |         |                                  |                         |         |    |         |
| Body mass index             | -0.036               | (-0.057, - 0.016)       | 0.0006  | -0.023                           | (-0.042, -0.0041)       | 5.71    | 1  | 0.017   |
| Disease burden <sup>a</sup> |                      |                         | <0.0001 |                                  |                         | 12.23   | 1  | 0.0005  |
| Yes                         | 8.07                 | 7.95 - 8.20             |         | 7.52                             | 7.11 - 7.95             |         |    |         |
| No                          | 8.77                 | 8.60 - 8.93             |         | 7.87                             | 7.44 - 8.30             |         |    |         |
| Depression <sup>b</sup>     |                      |                         | 0.0083  |                                  |                         |         |    |         |
| Yes                         | 7.11                 | 6.22 - 8.01             |         |                                  |                         |         |    |         |

1  
2  
3  
4  
5  
6  
7  
8  
9  
10  
11  
12  
13  
14  
15  
16  
17  
18  
19  
20  
21  
22  
23  
24  
25  
26  
27  
28  
29  
30  
31  
32  
33  
34  
35  
36  
37  
38  
39  
40  
41  
42  
43  
44  
45  
46

|                                         |                            |      |             |         |      |             |       |      |
|-----------------------------------------|----------------------------|------|-------------|---------|------|-------------|-------|------|
| Level of anxiety <sup>c</sup>           | No                         | 8.33 | 8.23 - 8.43 | <0.0001 |      |             |       |      |
|                                         | No                         | 8.55 | 8.44 - 8.66 |         |      |             |       |      |
|                                         | Mild                       | 7.59 | 7.38 - 7.81 |         |      |             |       |      |
|                                         | Moderate                   | 7.44 | 6.95 - 7.94 |         |      |             |       |      |
|                                         | Severe                     | 8.00 | 7.03 - 8.97 |         |      |             |       |      |
| Depression and/or anxiety <sup>bd</sup> |                            |      |             |         |      | 1.73        | 2     | 0.17 |
|                                         | No depression / No anxiety |      |             |         | 8.02 | 7.72 - 8.31 |       |      |
|                                         | Only anxiety               |      |             |         | 7.67 | 7.07 - 8.27 |       |      |
|                                         | Depression and anxiety     |      |             |         | 7.41 | 6.57 - 8.25 |       |      |
| Occupational stress <sup>e</sup>        |                            |      |             | <0.0001 |      |             | 29.80 | 1    |
|                                         | Yes                        | 7.47 | 7.18 - 7.76 |         | 7.28 | 6.82 - 7.74 |       |      |
|                                         | No                         | 8.47 | 8.37 - 8.57 |         | 8.12 | 7.70 - 8.54 |       |      |
| 3-shift work                            |                            |      |             | 0.0040  |      |             | 3.75  | 1    |
|                                         | Yes                        | 8.74 | 8.43 - 9.05 |         | 7.84 | 7.36 - 8.33 |       |      |
|                                         | No                         | 8.26 | 8.15 - 8.36 |         | 7.55 | 7.16 - 7.95 |       |      |
| Self-reported sleep quality             |                            |      |             | <0.0001 |      |             | 14.44 | 2    |
|                                         | Very good                  | 9.00 | 8.73 - 9.25 |         | 8.13 | 7.66 - 8.60 |       |      |
|                                         | Good                       | 8.34 | 8.22 - 8.47 |         | 7.68 | 7.25 - 8.10 |       |      |
|                                         | Poor                       | 7.80 | 7.59 - 8.00 |         | 7.29 | 6.86 - 7.72 |       |      |

<sup>a</sup> At least one chronic disease diagnosed by a physician, <sup>b</sup> Defined by Major Depression Inventory (MDI) diagnostic tool (DSM IV), <sup>c</sup> General Anxiety Disorder 7-item Scale (GAD-7), <sup>d</sup> General Anxiety Disorder 7-item Scale (GAD-7), moderate or severe anxiety, <sup>e</sup> Bergen Burnout Indicator 15 (BBI15), at least mild occupational stress, CI= Confidence Interval, DF = Degrees of freedom, WAS = Work Ability Score

## DISCUSSION

In this study, we managed to show that occupational stress, self-reported sleep quality, and disease burden were powerful predictors of both QoL and work ability in public sector employees. In addition, QoL was strongly associated with BMI and depression and / or anxiety. To our knowledge, few studies have evaluated QoL and work ability simultaneously among apparently healthy, working-age individuals, with information about a wide range of factors potentially influencing these two variables. However, although both QoL and work ability were assessed, we could not enter them in the same model because these factors are so closely related.

Occupational stress was identified as the strongest predictor of both QoL and work ability in this study. It is well known, that job strain is an important factor affecting employees' health and well-being.[26–28] Occupational stress is known to be associated, for example, with poor sleep quality [29], lower work ability [30] and mental health problems.[31] Furthermore, work stress was found to be associated with elevated mortality rates in patients with cardiometabolic disease in a large multicohort study.[32] Work stress has also been found to have a negative association with QoL in several studies.[26,27] The interesting finding in our study was that the association of occupational stress with QoL and WAS was strong, regardless of the fact that our study population had low rates of occupational stress. Only 10.6% of the participants in our study had at least mild occupational stress symptoms, and severe symptoms were very rare. It is thus possible that even low levels of occupational stress can have an important influence on a person's work ability and QoL. These results highlight the need for screening and handling of work stress among municipal employees.

As we hypothesized, self-reported sleep quality was also a powerful predictor of both QoL and work ability in this study. A negative association between poor sleep quality and QoL has previously been demonstrated among patients with sleep disorders and other medical conditions [6–9], and studies on shift workers have shown a clear association between sleep quality and QoL.[33,34] Furthermore, in a previous work on higher education students, Marques et al. showed that self-reported sleep

1  
2  
3 quality remained a significant predictor of most aspects of QoL, regardless of the presence of  
4  
5 psychopathological symptoms, such as depression.[10] Sleep problems have in previous literature  
6  
7 also been linked to poorer work ability and an increased rate of sickness absence.[11,12] In addition,  
8  
9 Ng et al. have shown a positive association between good sleep quality and work ability among Hong  
10  
11 Kong construction workers.[35] However, in this study we managed to show that self-reported sleep  
12  
13 quality is a significant predictor of both QoL and work ability among apparently healthy employees  
14  
15 not restricted to a specific occupation and working mainly in regular morning shifts. The associations  
16  
17 remained significant also in the multivariable models, where many potential confounding factors  
18  
19 could be taken into account.  
20  
21  
22

23  
24 Disease burden, higher BMI and lower educational level were negatively associated with both QoL  
25  
26 and work ability in this study, as well as in previous literature. Chronic diseases are known to have a  
27  
28 negative association with QoL [2] and with work ability.[36,37] Lower BMI has been linked to better  
29  
30 QoL [38] and to better work ability [39,40], and higher education has been positively associated with  
31  
32 QoL [41] and with work ability.[42] In our study, as well as in previous literature, older age was  
33  
34 associated with poorer work ability [39,43], but no significant association was found between age  
35  
36 and QoL. This finding is consistent with the Finnish reference values for the EUROHIS-QOL 8-item  
37  
38 index.[44] Furthermore, cohabiting had a significant positive association with QoL in our study, as  
39  
40 has previously been observed in a population based study in Sweden.[45] Cohabiting has previously  
41  
42 been linked to better health and work ability, for example, in an unemployed population [46], but in  
43  
44 our setting, where only active work force was studied, there was no significant association between  
45  
46 cohabiting and work ability.  
47  
48  
49

50  
51 An interesting finding in our study was that depression and / or anxiety was a strong predictor of  
52  
53 QoL but did not have a significant association with work ability in the multivariable model.

54  
55 Depression and anxiety are known to have a negative impact on QoL [47–49], but depression also  
56  
57 affects a person's ability to work.[37,50] However, depression often leads to sickness absence, which  
58  
59  
60

1  
2  
3 means that these people are not in the active work force. In our study, the prevalence of depression  
4 and anxiety was low, and most of the cases were relatively mild. Only 9 (1.3%) of the participants  
5 met the diagnostic criteria for major depression and 33 (4.6%) of the participants were categorized  
6 as moderately or severely anxious. It is known that not all depressive patients consider themselves  
7 unable to work.[50] These patients may benefit from the schedule and routine of work life and do  
8 not want to seek sick leave, while depression still affects their QoL. In the Finnish Current Care  
9 Guidelines for depression, sick leave is not recommended in mild depression and the need for sick  
10 leave in moderate depression should be evaluated individually.[51] According to these  
11 recommendations, those depressive patients whose work ability is not affected should remain in the  
12 active work force. Furthermore, as the prevalence of depression and anxiety in our study population  
13 was low, the generalizability of these results can be questioned.

14  
15  
16  
17  
18  
19  
20  
21  
22  
23  
24  
25  
26  
27  
28  
29 In this study, 3-shift work was not significantly associated either with QoL or with work ability in the  
30 multivariable models. In the univariate approach, the work ability of the 3-shift workers was better  
31 ( $p=0.0040$ ), but no significant difference was seen in QoL. Somewhat surprisingly, 3-shift work did  
32 not seem to have any adverse effects on the participants' well-being in our study. There was no  
33 difference in sleep quality or occupational stress compared to the regular morning shift workers.  
34  
35  
36  
37  
38  
39  
40  
41  
42  
43  
44  
45  
46  
47  
48  
49  
50  
51  
52  
53  
54  
55  
56  
57  
58  
59  
60  
Almost all 3-shift workers in our study were women working as nurses or social workers. Their mean  
age was 45.6 years, which is 3.5 years younger than the mean age of the whole study population. In  
addition to the younger age, one possible explanation for their well-being is that they may have  
voluntarily chosen to work in shifts and feel that it is a suitable way of working for them. Those shift  
workers who have had health problems or difficulties with sleep due to shift work may have changed  
to day work.[52] Another unexpected result in this work was that harmful alcohol consumption did  
not have adverse effects on sleep quality, QoL or work ability. However, even though there were 101  
(14.2%) participants that fulfilled the definition of "harmful drinking" in the AUDIT-C, heavy drinking  
was very rare in this predominantly female, active work force population. We assume that these

1  
2  
3 people may consume alcohol mainly during weekends, which diminishes the effects on everyday life  
4  
5 and work.  
6  
7

8 We acknowledge some limitations of the study. We cannot determine the causality of the found  
9  
10 associations because of the cross-sectional nature of the study. A possible healthy worker effect [53]  
11  
12 can be present because only subjects in the active work force were studied. In addition, the initial  
13  
14 response rate in the first part of the study in 2014 was only 32.5% (and 84.9% of them attended this  
15  
16 follow-up study in 2015). It is known that response rates in e-mail surveys tend to be lower than in  
17  
18 mail surveys [54], but it can nevertheless cause selection bias. It is possible that the healthiest part  
19  
20 of the work force is also the most willing to attend voluntary health surveys, which may result in the  
21  
22 possibility that our results reflect the situation in the mainly healthy section of the work force. The  
23  
24 information about alcohol consumption was collected by self-assessment, which may be influenced  
25  
26 by social desirability. In addition, we unfortunately do not have data of possible menopausal  
27  
28 symptoms, which may have affected our results in women.  
29  
30  
31  
32

33  
34 The strengths of our study are that we could take into account several aspects affecting the  
35  
36 employees' QoL and work ability. All questionnaires were completed by the participants at home  
37  
38 before the examination was performed. In this study, the approaches to sleep quality, QoL and work  
39  
40 ability were all subjective, which emphasizes the importance of personal experience in evaluating  
41  
42 these factors. We assessed self-reported sleep quality and work ability with single questions. This  
43  
44 approach was chosen over longer questionnaires because a single question could also be used at a  
45  
46 normal physician's appointment in primary or occupational health care for the evaluation of these  
47  
48 factors. The self-reported sleep quality question we used was from the Pittsburgh Sleep Quality  
49  
50 Index (PSQI), and it has previously been shown to be closely related with QoL.[10] With this question  
51  
52 we showed a clear association of sleep quality with QoL and with work ability. However, it would be  
53  
54 interesting to further assess this connection in a similar population with a more detailed  
55  
56 questionnaire to determine whether the different components of sleep have different impacts on  
57  
58  
59  
60

1  
2  
3 QoL and work ability. The WAS score we used for the evaluation of work ability has been shown to  
4  
5 have a strong association with the Work Ability Index and is reliable in evaluating work ability.[55]  
6  
7 WAS has also been shown to predict disability pension and long-term sickness absence according to  
8  
9 a Finnish register-based study.[56] The associations of self-reported sleep quality with both QoL and  
10  
11 with work ability were clear and in line with previous literature even when studied with these simple  
12  
13 tools.  
14  
15

## 16 17 **CONCLUSIONS**

18  
19  
20 In this paper we showed that occupational stress and self-reported sleep quality are powerful  
21  
22 predictors of both QoL and work ability among Finnish public sector employees. According to our  
23  
24 results, even a low level of occupational stress has a significant negative association with QoL and  
25  
26 work ability. In addition, we found that even in this apparently healthy population one in four  
27  
28 employees suffers from poor sleep quality. These findings highlight the need for screening and  
29  
30 handling work stress and sleep problems in occupational and primary health care.  
31  
32

## 33 34 **CONTRIBUTORS**

35  
36  
37 EB, EL, SM, PR and PK contributed to the conception or design of the work, and to the acquisition,  
38  
39 analysis or interpretation of data for the work. EB and PK drafted the manuscript. All authors  
40  
41 critically revised the manuscript, gave final approval, and agreed to be accountable for all aspects of  
42  
43 work ensuring integrity and accuracy.  
44  
45

## 46 47 **ACKNOWLEDGEMENTS**

48  
49  
50 Not applicable.  
51

## 52 53 **FUNDING**

54  
55  
56 This study was supported by the Hospital District of Satakunta, the Hospital District of Southwest  
57  
58 Finland and Etera Mutual Pension Insurance Company.  
59  
60



## DECLARATION OF COMPETING INTERESTS

The authors declare that they have no competing interests.

## ETHICAL APPROVAL

All procedures performed in studies involving human participants were in accordance with the ethical standards of the institutional and/or national research committee and with the 1964 Helsinki Declaration and its later amendments or comparable ethical standards. The study protocol and consent forms were reviewed and approved by the Ethics Committee of the Hospital District of Southwest Finland (ETMK 43/180/2013).

## INFORMED CONSENT

Written informed consent was obtained from all individual participants included in the study.

## AVAILABILITY OF DATA

The datasets used and/or analysed during the current study are available from the corresponding author on request.

## REFERENCES

- 1 Idler EL, Benyamini Y. Self-rated health and mortality: a review of twenty-seven community studies. *J Health Soc Behav* 1997;**38**:21–37.<http://www.ncbi.nlm.nih.gov/pubmed/9097506> (accessed 3 Sep 2019).
- 2 Schmidt S, Mühlan H, Power M. The EUROHIS-QOL 8-item index: Psychometric results of a cross-cultural field study. *Eur J Public Health* 2006;**16**:420–8. doi:10.1093/eurpub/cki155
- 3 Ilmarinen J. The Work Ability Index (WAI). *Occup Med (Chic Ill)* 2006;**57**:160–160. doi:10.1093/occmed/kqm008
- 4 Buysse DJ, Reynolds CF, Monk TH, *et al*. The Pittsburgh sleep quality index: A new instrument

- 1  
2  
3 for psychiatric practice and research. *Psychiatry Res* Published Online First: 1989.  
4  
5 doi:10.1016/0165-1781(89)90047-4  
6  
7
- 8  
9 5 Bergman E, Löyttyniemi E, Rautava P, *et al.* Ideal cardiovascular health and quality of life  
10 among Finnish municipal employees. *Prev Med Reports* 2019;**15**:100922.  
11  
12 doi:10.1016/j.pmedr.2019.100922  
13  
14
- 15  
16 6 LeBlanc M, Beaulieu-Bonneau S, Mérette C, *et al.* Psychological and health-related quality of  
17 life factors associated with insomnia in a population-based sample. *J Psychosom Res*  
18 2007;**63**:157–66. doi:10.1016/j.jpsychores.2007.03.004  
19  
20  
21  
22
- 23  
24 7 Reimer MA, Flemons WW. Quality of life in sleep disorders. *Sleep Med Rev* 2003;**7**:335–49.  
25  
26 doi:10.1053/smr.v.2001.0220  
27  
28
- 29  
30 8 Liu L, Fiorentino L, Rissling M, *et al.* Decreased Health-Related Quality of Life in Women With  
31 Breast Cancer Is Associated With Poor Sleep. *Behav Sleep Med* 2013;**11**:189–206.  
32  
33 doi:10.1080/15402002.2012.660589  
34  
35
- 36  
37 9 Liu J-C, Hung H-L, Shyu Y-K, *et al.* The Impact of Sleep Quality and Daytime Sleepiness on  
38 Global Quality of Life in Community-Dwelling Patients With Heart Failure. *J Cardiovasc Nurs*  
39 2011;**24**:99–105. doi:10.1097/JCN.0b013e3181ed7d12  
40  
41  
42  
43
- 44  
45 10 Marques DR, Meia-Via AMS, da Silva CF, *et al.* Associations between sleep quality and  
46 domains of quality of life in a non-clinical sample: results from higher education students.  
47  
48 *Sleep Heal* 2017;**3**:348–56. doi:10.1016/j.sleh.2017.07.004  
49  
50
- 51  
52 11 Lian Y, Xiao J, Liu Y, *et al.* Associations between insomnia, sleep duration and poor work  
53 ability. *J Psychosom Res* 2015;**78**:45–51. doi:10.1016/j.jpsychores.2014.09.009  
54  
55
- 56  
57 12 Lallukka T, Kaikkonen R, Härkänen T, *et al.* Sleep and Sickness Absence: A Nationally  
58 Representative Register-Based Follow-Up Study. *Sleep* 2014;**37**:1413–25.  
59  
60

- 1  
2  
3 doi:10.5665/sleep.3986  
4  
5  
6  
7 13 Chiu MC, Wang MJJ, Lu CW, *et al.* Evaluating work ability and quality of life for clinical nurses  
8 in Taiwan. *Nurs Outlook* 2007;**55**:318–26. doi:10.1016/j.outlook.2007.07.002  
9  
10  
11  
12 14 Sörensen LE, Pekkonen MM, Männikkö KH, *et al.* Associations between work ability, health-  
13 related quality of life, physical activity and fitness among middle-aged men. *Appl Ergon*  
14 2008;**39**:786–91. doi:10.1016/j.apergo.2007.11.001  
15  
16  
17  
18  
19 15 Power M. Development of A Common Instrument for Quality of Life. *EUROHIS Dev Common*  
20 *Instruments Heal Surv* 2003;**57**:145–  
21 59.[http://www.euro.who.int/en/publications/abstracts/eurohis-developing-common-](http://www.euro.who.int/en/publications/abstracts/eurohis-developing-common-instruments-for-health-surveys)  
22 [instruments-for-health-surveys](http://www.euro.who.int/en/publications/abstracts/eurohis-developing-common-instruments-for-health-surveys)  
23  
24  
25  
26  
27  
28  
29 16 WHOQOL Group. the World Health Organization Quality of Life Assessment (Whoqol):  
30 Development and General Psychometric Properties\* the Whoqol Group{. *Soc Sci Med*  
31 1998;**46**:1569–85. doi:10.1016/S0277-9536(98)00009-4  
32  
33  
34  
35  
36  
37 17 THE WHOQOL GROUP. Development of the World Health Organization WHOQOL-BREF  
38 quality of life assessment. The WHOQOL Group. *Psychol Med* 1998;**28**:551–8. doi:10.5.12  
39  
40  
41  
42 18 Gould R, Ilmarinen J, Jarvisalo J, *et al.* *Dimensions of Work Ability*. 2008.  
43 doi:10.1108/02656710210415668  
44  
45  
46  
47 19 Näätänen P, Aro A, Mathiesen SB, *et al.* *Bergen Burnout Indicator 15*. Helsinki: : Edita 2003.  
48  
49  
50 20 Bech P, Rasmussen NA, Olsen LR, *et al.* The sensitivity and specificity of the Major Depression  
51 Inventory, using the Present State Examination as the index of diagnostic validity. *J Affect*  
52 *Disord* 2001;**66**:159–64. doi:10.1016/S0165-0327(00)00309-8  
53  
54  
55  
56  
57 21 Bech P, Timmerby N, Martiny K, *et al.* Psychometric evaluation of the Major Depression  
58 Inventory ( MDI ) as depression severity scale using the LEAD ( Longitudinal Expert  
59  
60

- 1  
2  
3 Assessment of All Data ) as index of validity. *BMC Psychiatry* 2015;:1–7. doi:10.1186/s12888-  
4 015-0529-3  
5  
6  
7  
8  
9 22 Spitzer RL, Kroenke K, Williams JBW, *et al.* A Brief Measure for Assessing Generalized Anxiety  
10 Disorder. 2006;**166**:1092–7.  
11  
12  
13  
14 23 Bush K, Kivlahan DR, McDonell MB, *et al.* The AUDIT alcohol consumption questions (AUDIT-  
15 C). *Arch Intern Med* 1998;**158**:1789–95. doi:10.1097/00000374-199811000-00034  
16  
17  
18  
19 24 Aalto M, Tuunanen M, Sillanaukee P, *et al.* Effectiveness of structured questionnaires for  
20 screening heavy drinking in middle-aged women. *Alcohol Clin Exp Res* 2006;**30**:1884–8.  
21  
22 doi:10.1111/j.1530-0277.2006.00233.x  
23  
24  
25  
26 25 Tuunanen M, Aalto M, Seppä K. Binge drinking and its detection among middle-aged men  
27 using AUDIT, AUDIT-C and AUDIT-3. *Drug Alcohol Rev* 2007;**26**:295–9.  
28  
29 doi:10.1080/09595230701247756  
30  
31  
32  
33  
34 26 Sarafis P, Rousaki E, Tsounis A, *et al.* The impact of occupational stress on nurses' caring  
35 behaviors and their health related quality of life. *BMC Nurs* 2016;**15**:1–9.  
36  
37 doi:10.1186/s12912-016-0178-y  
38  
39  
40  
41  
42 27 Yang X, Ge C, Hu B, *et al.* Relationship between quality of life and occupational stress among  
43 teachers. *Public Health* 2009;**123**:750–5. doi:10.1016/j.puhe.2009.09.018  
44  
45  
46  
47 28 Lerner DJ, Levine S, Malspeis S, *et al.* Job strain and health-related quality of life in a national  
48 sample. *Am J Public Health* 1994;**84**:1580–5. doi:10.2105/AJPH.84.10.1580  
49  
50  
51  
52 29 Knudsen HK, Ducharme LJ, Roman PM. Job stress and poor sleep quality: Data from an  
53 American sample of full-time workers. *Soc Sci Med* 2007;**64**:1997–2007.  
54  
55 doi:10.1016/j.socscimed.2007.02.020  
56  
57  
58  
59 30 Yong M, Nasterlack M, Pluto R-P, *et al.* Occupational stress perception and its potential  
60

- 1  
2  
3 impact on work ability. *Work* Published Online First: 2013. doi:10.3233/WOR-121556  
4  
5
- 6 31 Chen W-Q, Wong T-W, Yu T-S. Review Article: Influence of occupational stress on mental  
7 health among Chinese off-shore oil workers. *Scand J Soc Med* 2009;**37**:766–73.  
8  
9 doi:10.1177/1403494809341097  
10  
11  
12
- 13 32 Kivimäki M, Pentti J, Ferrie JE, *et al.* Work stress and risk of death in men and women with  
14 and without cardiometabolic disease: a multicohort study. *Lancet Diabetes Endocrinol*  
15  
16 2018;**7**:7–9. doi:10.1016/S2213-8587(18)30140-2  
17  
18  
19
- 20 33 Palhares V de C, Corrente JE, Matsubara BB. Association between sleep quality and quality of  
21 life in nursing professionals working rotating shifts. *Rev Saude Publica* 2014;**48**:594–601.  
22  
23 doi:10.1590/S0034-8910.2014048004939  
24  
25  
26
- 27 34 Nena E, Katsaouni M, Steiropoulos P, *et al.* Effect of Shift Work on Sleep , Health , and Quality  
28 of Life of Health-care Workers. *Indian J Occup Env Med* 2018;**22**:29–34.  
29  
30  
31  
32  
33  
34  
35  
36
- 37 35 Ng JYK, Chan AHS. The work ability of Hong Kong construction workers in relation to  
38 individual and work-related factors. *Int J Environ Res Public Health* 2018;**15**.  
39  
40  
41  
42  
43  
44
- 45 36 Jędryka-Góral A, Bownik I, Michalak JM, *et al.* Work Ability in Ageing Workers Suffering From  
46 Chronic Diseases. *Int J Occup Saf Ergon* 2015;**12**:17–30.  
47  
48  
49  
50
- 51 37 Leino-Arjas P, Kaila-Kangas L, Heliövaara M, *et al.* The Relation of Co-occurring  
52 Musculoskeletal Pain and Depressive Symptoms With Work Ability. *J Occup Environ Med*  
53  
54 2013;**55**:1281–5. doi:10.1097/jom.0b013e3182a4ffc4  
55  
56  
57  
58
- 59 38 Kroes M, Osei-Assibey G, Baker-Searle R, *et al.* Impact of weight change on quality of life in  
60

- adults with overweight/obesity in the United States: a systematic review. *Curr Med Res Opin* 2015;**32**:485–508. doi:10.1185/03007995.2015.1128403
- 39 Bridger RS, Bennett AI. Age and BMI interact to determine work ability in seafarers. *Occup Med (Chic Ill)* 2011;**61**:157–62. doi:10.1093/occmed/kqr003
- 40 Andersen LL, Izquierdo M, Sundstrup E. Overweight and obesity are progressively associated with lower work ability in the general working population: cross-sectional study among 10,000 adults. *Int Arch Occup Environ Health* 2017;**90**:779–87. doi:10.1007/s00420-017-1240-0
- 41 Mielck A, Reitmeir P, Vogelmann M, *et al.* Impact of educational level on health-related quality of life ( HRQL ): results from Germany based on the EuroQol 5D ( EQ-5D ). *Eur J Public Health* 2011;**23**:45–50. doi:10.1093/eurpub/ckr206
- 42 Martimo KP, Varonen H, Husman K, *et al.* Factors associated with self-assessed work ability. *Occup Med (Chic Ill)* 2007;**57**:380–2. doi:10.1093/occmed/kqm028
- 43 Pohjonen T. Perceived work ability of home care workers in relation to individual and work-related factors in different age groups. *Occup Med (Chic Ill)* 2001;**51**:209–17. doi:10.1093/occmed/51.3.209
- 44 Koskinen S, Lundqvist A, Ristiluoma N. *Terveys, toimintakyky ja hyvinvointi Suomessa 2011. 2012.*  
[http://www.julkari.fi/bitstream/handle/10024/90832/Rap068\\_2012\\_netti.pdf?sequence=1](http://www.julkari.fi/bitstream/handle/10024/90832/Rap068_2012_netti.pdf?sequence=1)
- 45 Helena Michelson, Christina Bolund,. Health-related Quality of Life Measured by the EORTC QLQ-C30: Reference Values From a Large Sample of the Swedish Population. *Acta Oncol (Madr)* 2002;**39**:477–84. doi:10.1080/028418600750013384
- 46 Hult M, Pietilä AM, Koponen P, *et al.* Association between good work ability and health

- 1  
2  
3 behaviours among unemployed: A cross-sectional survey. *Appl Nurs Res* 2018;**43**:86–92.  
4  
5 doi:10.1016/j.apnr.2018.07.008  
6  
7  
8  
9 47 Saarni SI, Suvisaari J, Sintonen H, *et al.* Impact of psychiatric disorders on health-related  
10 quality of life: General population survey. *Br J Psychiatry* 2007;**190**:326–32.  
11  
12 doi:10.1192/bjp.bp.106.025106  
13  
14  
15  
16 48 Palacin C, Martinez-Alonso M, Codony M, *et al.* Use of mental health services in Europe:  
17 results from the European Study of the Epidemiology of Mental Disorders (ESEMed) project.  
18  
19 *Acta Psychiatr Scand* 2004;**109**:47–54. doi:10.1111/j.1600-0047.2004.00330.x  
20  
21  
22  
23  
24 49 Da Rocha NS, Power MJ, Bushnell DM, *et al.* The EUROHIS-QOL 8-item index: Comparative  
25 psychometric properties to its parent WHOQOL-BREF. *Value Heal* 2012;**15**:449–57.  
26  
27 doi:10.1016/j.jval.2011.11.035  
28  
29  
30  
31 50 Elinson L, Houck P, Marcus SC, *et al.* Depression and the Ability to Work. *Psychiatr Serv*  
32  
33 2003;**55**:29–34. doi:10.1176/appi.ps.55.1.29  
34  
35  
36  
37 51 Isometsä E, Kinnunen E, Kivekäs T, *et al.* Depression. Current Care Guidelines. Working group  
38 set up by the Finnish Medical Society Duodecim and the Finnish Psychiatric Association.  
39 Finnish Curr. Care Guidel. 2016.www.kaypahoito.fi (accessed 5 Sep 2019).  
40  
41  
42  
43  
44 52 Linton SJ, Kecklund G, Franklin KA, *et al.* The effect of the work environment on future sleep  
45 disturbances: A systematic review. *Sleep Med Rev* 2015;**23**:10–9.  
46  
47 doi:10.1016/j.smr.2014.10.010  
48  
49  
50  
51 53 Li C, Sung E. A review of the healthy worker effect in occupational epidemiology. *Occup Med*  
52  
53 (*Chic Ill*) 1999;**49**:225–9.  
54  
55  
56  
57 54 Shih T, Fan X. Comparing response rates in e-mail and paper surveys : A meta-analysis. *Educ*  
58  
59 *Res Rev* 2009;**4**:26–40. doi:10.1016/j.edurev.2008.01.003  
60

- 1  
2  
3 55 Fassi M El, Bocquet V, Majery N, *et al.* Work ability assessment in a worker population :  
4 comparison and determinants of Work Ability Index and Work Ability score. *BMC Public*  
5 *Health* 2013;**13**:1–10.  
6  
7  
8  
9  
10  
11 56 Kinnunen U, Nätti J. Work ability score and future work ability as predictors of register-based  
12 disability pension and long-term sickness absence: A three-year follow-up study. *Scand J*  
13 *Public Health* 2018;**46**:321–30. doi:10.1177/1403494817745190  
14  
15  
16  
17  
18  
19  
20  
21  
22  
23  
24  
25  
26  
27  
28  
29  
30  
31  
32  
33  
34  
35  
36  
37  
38  
39  
40  
41  
42  
43  
44  
45  
46  
47  
48  
49  
50  
51  
52  
53  
54  
55  
56  
57  
58  
59  
60

For peer review only



1  
2  
3  
4  
5  
6  
7  
8  
9  
10  
11  
12  
13  
14  
15  
16  
17  
18  
19  
20  
21  
22  
23  
24  
25  
26  
27  
28  
29  
30  
31  
32  
33  
34  
35  
36  
37  
38  
39  
40  
41  
42  
43  
44  
45  
46  
47  
48  
49  
50  
51  
52  
53  
54  
55  
56  
57  
58  
59  
60STROBE Statement—Checklist of items that should be included in reports of *cross-sectional studies*

|                              | <b>Item No</b> | <b>Recommendation</b>                                                                                                                                                                                                                                                                                                                                                                                         |
|------------------------------|----------------|---------------------------------------------------------------------------------------------------------------------------------------------------------------------------------------------------------------------------------------------------------------------------------------------------------------------------------------------------------------------------------------------------------------|
| <b>Title and abstract</b>    | 1              | (a) Indicate the study's design with a commonly used term in the title or the abstract<br>(b) Provide in the abstract an informative and balanced summary of what was done and what was found                                                                                                                                                                                                                 |
| <b>Introduction</b>          |                |                                                                                                                                                                                                                                                                                                                                                                                                               |
| Background/rationale         | 2              | Explain the scientific background and rationale for the investigation being reported                                                                                                                                                                                                                                                                                                                          |
| Objectives                   | 3              | State specific objectives, including any prespecified hypotheses                                                                                                                                                                                                                                                                                                                                              |
| <b>Methods</b>               |                |                                                                                                                                                                                                                                                                                                                                                                                                               |
| Study design                 | 4              | Present key elements of study design early in the paper                                                                                                                                                                                                                                                                                                                                                       |
| Setting                      | 5              | Describe the setting, locations, and relevant dates, including periods of recruitment, exposure, follow-up, and data collection                                                                                                                                                                                                                                                                               |
| Participants                 | 6              | (a) Give the eligibility criteria, and the sources and methods of selection of participants                                                                                                                                                                                                                                                                                                                   |
| Variables                    | 7              | Clearly define all outcomes, exposures, predictors, potential confounders, and effect modifiers. Give diagnostic criteria, if applicable                                                                                                                                                                                                                                                                      |
| Data sources/<br>measurement | 8*             | For each variable of interest, give sources of data and details of methods of assessment (measurement). Describe comparability of assessment methods if there is more than one group                                                                                                                                                                                                                          |
| Bias                         | 9              | Describe any efforts to address potential sources of bias                                                                                                                                                                                                                                                                                                                                                     |
| Study size                   | 10             | Explain how the study size was arrived at                                                                                                                                                                                                                                                                                                                                                                     |
| Quantitative variables       | 11             | Explain how quantitative variables were handled in the analyses. If applicable, describe which groupings were chosen and why                                                                                                                                                                                                                                                                                  |
| Statistical methods          | 12             | (a) Describe all statistical methods, including those used to control for confounding<br>(b) Describe any methods used to examine subgroups and interactions<br>(c) Explain how missing data were addressed<br>(d) If applicable, describe analytical methods taking account of sampling strategy<br>(e) Describe any sensitivity analyses                                                                    |
| <b>Results</b>               |                |                                                                                                                                                                                                                                                                                                                                                                                                               |
| Participants                 | 13*            | (a) Report numbers of individuals at each stage of study—eg numbers potentially eligible, examined for eligibility, confirmed eligible, included in the study, completing follow-up, and analysed<br>(b) Give reasons for non-participation at each stage<br>(c) Consider use of a flow diagram                                                                                                               |
| Descriptive data             | 14*            | (a) Give characteristics of study participants (eg demographic, clinical, social) and information on exposures and potential confounders<br>(b) Indicate number of participants with missing data for each variable of interest                                                                                                                                                                               |
| Outcome data                 | 15*            | Report numbers of outcome events or summary measures                                                                                                                                                                                                                                                                                                                                                          |
| Main results                 | 16             | (a) Give unadjusted estimates and, if applicable, confounder-adjusted estimates and their precision (eg, 95% confidence interval). Make clear which confounders were adjusted for and why they were included<br>(b) Report category boundaries when continuous variables were categorized<br>(c) If relevant, consider translating estimates of relative risk into absolute risk for a meaningful time period |
| Other analyses               | 17             | Report other analyses done—eg analyses of subgroups and interactions, and sensitivity analyses                                                                                                                                                                                                                                                                                                                |

|                          |    |                                                                                                                                                                            |
|--------------------------|----|----------------------------------------------------------------------------------------------------------------------------------------------------------------------------|
| <b>Discussion</b>        |    |                                                                                                                                                                            |
| Key results              | 18 | Summarise key results with reference to study objectives                                                                                                                   |
| Limitations              | 19 | Discuss limitations of the study, taking into account sources of potential bias or imprecision. Discuss both direction and magnitude of any potential bias                 |
| Interpretation           | 20 | Give a cautious overall interpretation of results considering objectives, limitations, multiplicity of analyses, results from similar studies, and other relevant evidence |
| Generalisability         | 21 | Discuss the generalisability (external validity) of the study results                                                                                                      |
| <b>Other information</b> |    |                                                                                                                                                                            |
| Funding                  | 22 | Give the source of funding and the role of the funders for the present study and, if applicable, for the original study on which the present article is based              |

\*Give information separately for exposed and unexposed groups.

**Note:** An Explanation and Elaboration article discusses each checklist item and gives methodological background and published examples of transparent reporting. The STROBE checklist is best used in conjunction with this article (freely available on the Web sites of PLoS Medicine at <http://www.plosmedicine.org/>, Annals of Internal Medicine at <http://www.annals.org/>, and Epidemiology at <http://www.epidem.com/>). Information on the STROBE Initiative is available at [www.strobe-statement.org](http://www.strobe-statement.org).

# BMJ Open

## Factors associated with quality of life and work ability among Finnish municipal employees: a cross-sectional study

|                                 |                                                                                                                                                                                                                                                                                                                                                                                                                                                                         |
|---------------------------------|-------------------------------------------------------------------------------------------------------------------------------------------------------------------------------------------------------------------------------------------------------------------------------------------------------------------------------------------------------------------------------------------------------------------------------------------------------------------------|
| Journal:                        | <i>BMJ Open</i>                                                                                                                                                                                                                                                                                                                                                                                                                                                         |
| Manuscript ID                   | bmjopen-2019-035544.R1                                                                                                                                                                                                                                                                                                                                                                                                                                                  |
| Article Type:                   | Original research                                                                                                                                                                                                                                                                                                                                                                                                                                                       |
| Date Submitted by the Author:   | 14-Feb-2020                                                                                                                                                                                                                                                                                                                                                                                                                                                             |
| Complete List of Authors:       | Bergman, Elina; University of Turku, General Practice<br>Löyttyniemi, Eliisa; University of Turku, Department of Biostatistics<br>Myllyntausta, Saana; University of Turku, Department of Public Health<br>Rautava, Paivi; Turku University Hospital, Clinical Research Centre;<br>University of Turku Faculty of Medicine, Department of Public Health<br>Korhonen, Päivi; Turun Yliopisto, General Practice; Central Satakunta<br>Health Federation of Municipalities |
| <b>Primary Subject Heading</b>: | General practice / Family practice                                                                                                                                                                                                                                                                                                                                                                                                                                      |
| Secondary Subject Heading:      | Patient-centred medicine                                                                                                                                                                                                                                                                                                                                                                                                                                                |
| Keywords:                       | PRIMARY CARE, OCCUPATIONAL & INDUSTRIAL MEDICINE, PREVENTIVE MEDICINE                                                                                                                                                                                                                                                                                                                                                                                                   |
|                                 |                                                                                                                                                                                                                                                                                                                                                                                                                                                                         |

SCHOLARONE™  
Manuscripts

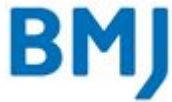

I, the Submitting Author has the right to grant and does grant on behalf of all authors of the Work (as defined in the below author licence), an exclusive licence and/or a non-exclusive licence for contributions from authors who are: i) UK Crown employees; ii) where BMJ has agreed a CC-BY licence shall apply, and/or iii) in accordance with the terms applicable for US Federal Government officers or employees acting as part of their official duties; on a worldwide, perpetual, irrevocable, royalty-free basis to BMJ Publishing Group Ltd ("BMJ") its licensees and where the relevant Journal is co-owned by BMJ to the co-owners of the Journal, to publish the Work in this journal and any other BMJ products and to exploit all rights, as set out in our [licence](#).

The Submitting Author accepts and understands that any supply made under these terms is made by BMJ to the Submitting Author unless you are acting as an employee on behalf of your employer or a postgraduate student of an affiliated institution which is paying any applicable article publishing charge ("APC") for Open Access articles. Where the Submitting Author wishes to make the Work available on an Open Access basis (and intends to pay the relevant APC), the terms of reuse of such Open Access shall be governed by a Creative Commons licence – details of these licences and which [Creative Commons](#) licence will apply to this Work are set out in our licence referred to above.

Other than as permitted in any relevant BMJ Author's Self Archiving Policies, I confirm this Work has not been accepted for publication elsewhere, is not being considered for publication elsewhere and does not duplicate material already published. I confirm all authors consent to publication of this Work and authorise the granting of this licence.

1  
2  
3  
4  
5  
6 **FACTORS ASSOCIATED WITH QUALITY OF LIFE AND WORK ABILITY AMONG FINNISH MUNICIPAL**  
7  
8 **EMPLOYEES: A CROSS-SECTIONAL STUDY**  
9

10  
11 Elina Bergman, MD<sup>a</sup>, Eliisa Löyttyniemi, MSc<sup>b</sup>, Saana Myllyntausta, MA<sup>c</sup>, Päivi Rautava, MD, PhD<sup>c d</sup>

12  
13  
14  
15 and Päivi E. Korhonen, MD, PhD <sup>a e</sup>

16  
17  
18 <sup>a</sup> Institute of Clinical Medicine, Department of General Practice, University of Turku and Turku  
19 University Hospital, Turku, Finland. <sup>b</sup> Department of Biostatistics, University of Turku, Turku,  
20 Finland. <sup>c</sup> Department of Public Health, University of Turku, and Turku University Hospital, Turku,  
21 Finland. <sup>d</sup> Clinical Research Centre, Turku University Hospital, Turku, Finland. <sup>e</sup> Central Satakunta  
22 Health Federation of Municipalities, Harjavalta, Finland.  
23  
24  
25  
26  
27  
28  
29  
30  
31  
32  
33  
34  
35  
36  
37  
38

39 Corresponding author:

40  
41  
42 Elina Bergman

43  
44  
45 Address:

46  
47  
48 Department of General Practice, Joukahaisenkatu 3-5, FI-20014 TURUN YLIOPISTO, FINLAND

49  
50  
51 Telephone: +358 50 307 4436

52  
53  
54 E-mail: [elkaro@utu.fi](mailto:elkaro@utu.fi)

55  
56  
57 Word count: 3904

**ABSTRACT**

**Objectives:** Quality of life (QoL) and work ability are elementary parts in defining the well-being of an employed person. The aim of this study was to demonstrate factors associated with QoL and self-reported work ability among public sector employees, while taking into account several confounding factors, including sleep quality, occupational stress and psychological symptoms.

**Methods:** A cross-sectional study was conducted in Finland among 710 employees (89% women, mean age 49 [SD = 10] years) from ten municipal work units in 2015. Information about the participants was collected by physical examination, self-administered questionnaire and from medical history. QoL was assessed with the EUROHIS-QOL 8-item index and work ability with the Work Ability Score (WAS).

**Results:** The EUROHIS-QOL mean score among all participants was 4.07 (95% CI 4.03–4.11). QoL was positively associated with good sleep quality, cohabiting, university-level education, and lower BMI, and negatively associated with occupational stress, depression and/or anxiety and disease burden. Work ability was reported good or excellent by 80% of the participants and the WAS mean score among all participants was 8.31 (95% CI 8.21–8.41). Work ability was positively associated with good sleep quality, younger age, lower BMI and university-level education, and negatively associated with occupational stress and disease burden.

**Conclusions:** Occupational stress and self-reported sleep quality were strongly associated with both QoL and work ability among Finnish public sector employees. These findings highlight the need for screening and handling of work stress and sleep problems in occupational and primary health care.

**KEYWORDS**

Quality of life, Work ability, Occupational health, Sleep quality, Occupational stress

## STRENGTHS AND LIMITATIONS OF THIS STUDY

- Several aspects associated with the employees' quality of life and work ability could be taken into account.
- The participants completed all questionnaires at home before the examination was performed.
- Psychological symptoms were assessed with well-validated instruments.
- Any causality cannot be determined due to the cross-sectional nature of the study.
- The response rate of the study was moderate at most, which is a common limitation in e-mail surveys.

## INTRODUCTION

Quality of life (QoL) and work ability are elementary outcomes in defining the well-being of an employed person. Both of these can be affected by numerous conditions, including physical and mental health [1,2], occupational stress [3,4], sleep quality [5,6], psychosocial risk factors and environmental aspects. [7] Many of these can be measured reliably by evaluating the persons' perceptions about the condition with self-reported assessment tools. [1,8–13] In our previous study, especially self-reported sleep quality was strongly associated with QoL among public sector employees. [14]

QoL and work ability have been studied also previously in currently employed populations, but most of the studies have concentrated on a specific occupational group or employees suffering from a certain medical condition. [2,15,16] To our knowledge, there is a gap of information about factors associated with QoL and work ability, studied simultaneously among apparently healthy public sector employees. Public sector is a large employer sector in the Scandinavian countries, and it

1  
2  
3 would be important to recognize the factors associated with well-being of the employees in  
4  
5 municipal work places.  
6  
7

8 The aim of this study was to demonstrate factors associated with QoL and self-reported work ability  
9  
10 among public sector employees, while taking into account several confounding factors, including  
11  
12 psychological symptoms, sleep quality and occupational stress. We wanted to use short, subjective  
13  
14 and user-friendly tools for the assessment of QoL, work ability and sleep quality. These instruments  
15  
16 could easily be used for screening also in occupational and primary healthcare.  
17  
18  
19  
20  
21  
22

## 23 **PARTICIPANTS AND METHODS**

### 24 **Participants**

25  
26  
27 This cross-sectional study was part of the PORTAAT (PORi To Aid Against Threats) study conducted  
28  
29 among employees of the city of Pori (83,497 inhabitants in 2014) in South-Western Finland in 2014  
30  
31 and 2015. The participating work units were selected by the chief of the Welfare Unit of Pori.  
32  
33

34 Invitations to participate and information of the study were sent to employees via e-mail by the  
35  
36 managers of the selected ten work units (total number of employees 2,570). The employees willing  
37  
38 to participate contacted the study contact person at their work unit, who then sent their contact  
39  
40 information to the study nurse. There were no exclusion criteria. A total of 836 employees (104  
41  
42 males, 732 females) participated in the study in 2014. The response rate in 2014 was 32.5%.  
43  
44  
45  
46

47 Complete information about data collection from that year has been described earlier. [17] All the  
48  
49 initial respondents were invited to the second part of the study in 2015, and 710 of them (79 males,  
50  
51 631 females) attended. In the present work, all the information is from the year 2015, and this data  
52  
53 was chosen, because complete information about psychosocial risk factors was available only from  
54  
55 that year. The gender distribution of the study participants corresponds to the standard gender  
56  
57 distribution of the employees of Pori. The participants' occupations included librarians, museum  
58  
59  
60



1  
2  
3 employees, janitors, IT workers, social workers, nurses, physicians, administrative officials, and  
4  
5 general office staff. The involved employment sectors, reported according to the number of  
6  
7 employees participating in the study in 2015 were Health and Welfare (275 employees), Social Work  
8  
9 (198), Technical Services (143), Education and Culture (62) and Administration (32).

### 12 13 **Quality of life**

14  
15  
16 QoL was assessed with the EUROHIS-QOL 8-item index.[18] This is a shortened version of the  
17  
18 WHOQOL-Bref scale, a widely used instrument for the assessment of generic QoL.[7,19] The domains  
19  
20 in both questionnaires are the general, physical, psychological, social and environmental aspects of  
21  
22 QoL. The EUROHIS-QOL instrument has been validated in several European countries.[1] The  
23  
24 participants of the present study answered the questions at home before the study visits. Every  
25  
26 question was scored from 1 to 5 (1 for very poor and 5 for very good). All scores were then added  
27  
28 together and divided by 8 (the sum of the questions) to obtain the EUROHIS-QOL mean score.[1]  
29  
30  
31

### 32 33 **Work-related measures**

34  
35  
36 Work ability was assessed with the question “What is your current work ability compared to your  
37  
38 lifetime best?”. This is the first item of the widely used Work Ability Index (WAI) [9], referred to as  
39  
40 the Work Ability Score (WAS). It has a 0–10 response scale, where 0 stands for “completely unable to  
41  
42 work” and 10 stands for “work ability at its best”. Work ability was considered poor for scores of 0–  
43  
44 5, moderate for scores of 6–7, good for scores of 8–9, and excellent for a score of 10 points, based  
45  
46 on the same values that have been used in the WAI.[20] Work-related stress was evaluated with  
47  
48 Bergen Burnout Indicator 15 (BBI-15).[13] The BBI-15 measures three dimensions of burnout:  
49  
50 exhaustion, cynicism, and reduced professional efficacy. Responses are rated on a 6-point Likert-  
51  
52 type scale (1 = totally disagree, 6 = totally agree). In this work, we used the total score from all three  
53  
54 dimensions, which can vary from 15 to 90, with higher scores indicating more severe burnout  
55  
56 symptoms. Burnout symptoms are in this indicator classified as severe, moderate, mild, and no  
57  
58 burnout, with specific threshold values according to gender and age.[13] We assessed burnout as a  
59  
60

1  
2  
3 binary variable where all scores from mild to severe burnout were set to indicate the presence of  
4  
5 burnout symptoms.  
6  
7

### 8 **Sleep-related measures**

9  
10  
11 Self-reported sleep quality was assessed with the question “During the past month, how would you  
12  
13 rate your sleep quality overall?” (very good, good, poor, or very poor). In the analyses, the two  
14  
15 lowest classes of sleep quality were combined and set to indicate poor sleep quality. Sleep duration  
16  
17 was assessed with the question “During the past month, how many hours of sleep did you normally  
18  
19 get at night?”. The participants were asked to answer the question in a free field, and sleep duration  
20  
21 was handled as a continuous variable in the analyses. Both of these questions are items from the  
22  
23 well-validated Pittsburgh Sleep Quality Index (PSQI)[10], which has good internal consistency ( $\alpha =$   
24  
25 0.83) and test–retest reliability ( $r = 0.82$ ; over an average of 19 days). [21,22]  
26  
27  
28  
29

### 30 **Psychological symptoms**

31  
32  
33 Depressive symptoms were assessed with the Major Depression Inventory (MDI) questionnaire.[23]  
34  
35 This inventory can be used as a diagnostic tool for major depression (according to DSM IV diagnostic  
36  
37 criteria) as well as an assessment tool for severity of depressive symptoms.[11,23] To assess severity  
38  
39 of depressive symptoms, a total score of 0–20 is considered as no symptoms, 21–25 as mild  
40  
41 symptoms, 26–30 as moderate symptoms, and 31–50 as severe depressive symptoms. In this work,  
42  
43 the diagnostic tool was used to determine whether a person had depression or not. Anxiety was  
44  
45 assessed with the General Anxiety Disorder 7-item Scale (GAD-7).[12] In the GAD-7, a total score of  
46  
47 0–4 is considered as no anxiety, 5–9 as mild anxiety, 10–14 as moderate anxiety, and 15–21 as  
48  
49 severe anxiety. A total score of 10 was used as a cut-off point when a binary variable for anxiety was  
50  
51 used in our analyses. This cut-off is recommended by the developers of the GAD-7  
52  
53 questionnaire.[12] The participants with severe depressive or anxious symptoms were referred to  
54  
55 the occupational health care for further follow-up.  
56  
57  
58  
59  
60

## Other measures

Smoking status was assessed by a questionnaire. Non-smoking was defined as having never smoked or having quit smoking >12 months ago. Height and weight were measured by a study nurse with subjects in standing position without shoes and outer garments. Weight was measured to the nearest 0.1 kg with calibrated scales and height to the nearest 0.5 cm with a wall-mounted stadiometer. BMI was calculated as weight (kg) divided by the square of height (m<sup>2</sup>). Information concerning diseases diagnosed by a physician, medication used regularly, marital status (cohabiting or not), working times (3-shift work or not) and education level (vocational school, college-level education, or university-level education) was gathered using self-administered questionnaires and medical records. Alcohol consumption was assessed using the 3-item Alcohol Use Disorders Identification Test (AUDIT-C) [24] with a cut-off of 5 points for harmful alcohol use in women and 6 points in men.[25,26] Disease burden was defined as having at least one chronic disease diagnosed by a physician.

## Statistical analysis

Continuous variables are presented with means and standard deviations (SD) together with 95% confidence intervals (CI). Categorical variables are summarized with counts and percentages (%). Association between sleep quality and background variables was evaluated using a chi-square test or a one-way analysis of variance (ANOVA).

Association between QoL / work ability and background variables including sleep quality were examined first one by one (univariate approach), with one-way analysis of variance or with linear regression. A multivariable model was then built up, and age, gender and all factors with significant association with QoL and / or work ability in the univariate approach were entered into the model. The method used was linear model and assumptions were checked using studentized residuals.

1  
2  
3 All statistical tests were performed as 2-sided, with a significance level set at 0.05. The analyses were  
4 performed using an SAS System version 9.4 for Windows (SAS Institute Inc., Cary, NC, USA).  
5  
6  
7

### 8 **Patient and public involvement**

9  
10  
11 Information events about the PORTAAT Study with guidance for the management of physical and  
12 psychosocial well-being were arranged for the employees of the selected work units. All participants  
13 were given personalized lifestyle counselling at the study visits. The chief of the Welfare Unit of Pori  
14 has been informed regularly about the published study results. The participants of this study were  
15 not involved in the design or development of the study.  
16  
17  
18  
19  
20  
21  
22  
23  
24  
25  
26

## 27 **RESULTS**

28  
29 The study cohort consisted of 710 employees with a mean age of 49 years (SD 10, range 20 – 68),  
30 89% of whom were female.  
31  
32  
33

### 34 **Characteristics of the participants**

35  
36  
37 Table 1 displays the basic characteristics of all the participants, also classified according to their sleep  
38 quality. Sleep quality was reported very good by 14.5%, good by 62.1%, poor by 21.2%, and very  
39 poor by 2.1% of the participants. Poor and very poor sleep quality were combined and set to indicate  
40 poor sleep quality in the analyses. Self-reported sleep quality was negatively associated with disease  
41 burden, prevalence of depression and severity of depressive symptoms, anxiety, and work stress,  
42 and positively associated with QoL and work ability. Better sleep quality was associated with longer  
43 sleep duration ( $p < 0.0001$ ). There were only five participants with a previously diagnosed obstructive  
44 sleep apnoea and three with restless legs syndrome. During the past month, 14.8% of the  
45 participants had used sleep medication at least occasionally. The use of sleep medication was more  
46 common in women (15.1% in women vs. 12.6% in men,  $p = 0.038$ ).  
47  
48  
49  
50  
51  
52  
53  
54  
55  
56  
57  
58  
59  
60

1  
2  
3 Only 9 (1.3%) of the participants were diagnosed as depressive according to the MDI diagnostic tool.  
4

5 All of them were also classified as anxious (GAD-7 score > 10). The measures from these two  
6

7 psychological symptoms were combined for multivariable analyses.  
8  
9  
10  
11  
12  
13  
14  
15  
16  
17  
18  
19  
20  
21  
22  
23  
24  
25  
26  
27  
28  
29  
30  
31  
32  
33  
34  
35  
36  
37  
38  
39  
40  
41  
42  
43  
44  
45  
46  
47  
48  
49  
50  
51  
52  
53  
54  
55  
56  
57  
58  
59  
60

For peer review only

Table 1

Characteristics of all the participants and classified according to self-reported sleep quality

|                                     | All participants     | Sleep quality        |                      |                      | p-value |
|-------------------------------------|----------------------|----------------------|----------------------|----------------------|---------|
|                                     |                      | Very good (n=103)    | Good (n=441)         | Poor (n=166)         |         |
| Age mean, years (SD)                | 49.0 (9.7)           | 47.5 (10.6)          | 49.1 (9.7)           | 49.8 (9.2)           | 0.072   |
| Gender, n (%)                       |                      |                      |                      |                      | 0.10    |
| Female                              | 631 (88.9)           | 85 (13.5)            | 397 (62.9)           | 149 (23.6)           |         |
| Male                                | 79 (11.1)            | 18 (22.8)            | 44 (55.7)            | 17 (21.5)            |         |
| Education, n (%)                    |                      |                      |                      |                      | 0.36    |
| Vocational school                   | 21 (3)               | 4 (19.1)             | 14 (66.7)            | 3 (14.3)             |         |
| College-level                       | 361 (51.6)           | 53 (14.7)            | 232 (64.3)           | 76 (21.1)            |         |
| University-level                    | 318 (45.4)           | 45 (14.2)            | 188 (59.1)           | 85 (26.7)            |         |
| Co-habiting, n (%)                  |                      |                      |                      |                      | 0.64    |
| Yes                                 | 575 (81.2)           | 83 (14.4)            | 353 (61.4)           | 139 (24.2)           |         |
| No                                  | 133 (18.8)           | 20 (15.0)            | 86 (64.7)            | 27 (20.3)            |         |
| 3-shift work, n (%)                 |                      |                      |                      |                      | 0.41    |
| Yes                                 | 76 (10.9)            | 15 (19.7)            | 44 (57.9)            | 17 (23.4)            |         |
| No                                  | 620 (89.1)           | 87 (14.0)            | 386 (57.9)           | 147 (23.7)           |         |
| Smoking, n (%)                      |                      |                      |                      |                      | 0.45    |
| Yes                                 | 64 (9.0)             | 9 (14.1)             | 44 (68.8)            | 11 (17.2)            |         |
| No                                  | 645 (91.0)           | 94 (14.6)            | 396 (61.4)           | 155 (24.0)           |         |
| Harmful alcohol consumption, n (%)  |                      |                      |                      |                      | 0.55    |
| Yes                                 | 101 (14.2)           | 18 (17.8)            | 59 (58.4)            | 24 (23.8)            |         |
| No                                  | 609 (85.8)           | 85 (14.0)            | 382 (62.7)           | 142 (23.3)           |         |
| Body mass index mean (95% CI)       | 26.8 (26.42 - 27.13) | 26.4 (25.50 - 27.25) | 27.0 (26.54 - 27.46) | 26.5 (25.72 - 27.24) | 0.92    |
| Disease burden <sup>a</sup> , n (%) |                      |                      |                      |                      | 0.0016  |
| Yes                                 | 468 (65.9)           | 55 (11.8)            | 289 (61.8)           | 124 (26.5)           |         |
| No                                  | 242 (34.1)           | 48 (19.8)            | 152 (62.8)           | 42 (17.4)            |         |

|                                    |                    |                    |                     |                    |         |
|------------------------------------|--------------------|--------------------|---------------------|--------------------|---------|
| Depression (MDI), n (%)            |                    |                    |                     |                    | 0.016   |
| Yes                                | 9 (1.3)            | 0 (0.0)            | 3 (33.3)            | 6 (66.7)           |         |
| No                                 | 701 (98.7)         | 103 (14.7)         | 438 (62.5)          | 160 (22.8)         |         |
| MDI mean score (95% CI)            | 5.0 (4.57-5.43)    | 2.4 (1.75 - 2.97)  | 4.1 (3.59 - 4.51)   | 9.2 (8.09 - 10.27) | <0.0001 |
| Level of anxiety (GAD-7), n (%)    |                    |                    |                     |                    | <0.0001 |
| No anxiety                         | 534 (75.2)         | 92 (17.2)          | 343 (64.2)          | 99 (18.5)          |         |
| Mild anxiety                       | 143 (20.1)         | 10 (7.0)           | 85 (59.4)           | 48 (33.6)          |         |
| Moderate anxiety                   | 26 (3.7)           | 1 (3.9)            | 10 (38.5)           | 15 (57.7)          |         |
| Severe anxiety                     | 7 (1.0)            | 0 (0.0)            | 3 (42.9)            | 4 (57.1)           |         |
| BBI15 mean total score (95% CI)    | 31.6 (30.82-32.41) | 28.3 (26.43-30.23) | 31.0 (30.05- 31.99) | 35.4 (33.60-37.20) | <0.0001 |
| Occupational stress (BBI15), n (%) |                    |                    |                     |                    | <0.0001 |
| No stress                          | 592 (89.4)         | 97 (16.4)          | 374 (63.2)          | 121 (20.4)         |         |
| Stress                             | 70 (10.6)          | 3 (4.3)            | 38 (54.3)           | 29 (41.4)          |         |
| Sleep duration mean (95% CI)       | 7.00 (6.93 - 7.07) | 7.50 (7.35 - 7.66) | 7.17 (7.09 - 7.24)  | 6.23 (6.09 - 6.38) | <0.0001 |
| EUROHIS mean score (95% CI)        | 4.07 (4.03 - 4.11) | 4.38 (4.30 - 4.45) | 4.09 (4.05 - 4.14)  | 3.83 (3.75 - 3.91) | <0.0001 |
| WAS mean score (95% CI)            | 8.31 (8.21-8.41)   | 8.99 (8.78 - 9.20) | 8.34 (8.22 - 8.46)  | 7.80 (7.55 - 8.04) | <0.0001 |
| Level of work ability (WAS), n (%) |                    |                    |                     |                    | <0.0001 |
| Poor                               | 27 (3.8)           | 1 (3.7)            | 12 (44.4)           | 14 (51.9)          |         |
| Moderate                           | 114 (16.1)         | 3 (2.6)            | 69 (60.5)           | 42 (36.8)          |         |
| Good                               | 459 (64.9)         | 61 (13.3)          | 298 (64.9)          | 100 (21.8)         |         |
| Excellent                          | 107 (15.1)         | 37 (34.6)          | 60 (56.1)           | 10 (9.4)           |         |

<sup>a</sup> At least one chronic disease diagnosed by a physician, BBI15 = Bergen Burnout Indicator 15, CI = Confidence Interval, EUROHIS = EUROHIS-QOL 8-item index, GAD-7= General Anxiety Disorder 7-item Scale, MDI = Major Depression Inventory, SD = Standard deviation, WAS = Work Ability Score

### Quality of life

As seen in Table 2, the EUROHIS-QOL mean score among all participants was 4.07 (SD 0.51) with no significant difference between genders ( $p=0.94$ ). In the univariate approach, QoL was positively associated with good sleep quality, university-level education, co-habiting, lower BMI and younger age, and negatively associated with occupational stress, depression, anxiety and disease burden.

In the multiway analysis of co-variance, QoL was positively associated with good sleep quality, co-habiting, university-level education and lower BMI, and negatively associated with occupational stress, depression and/or anxiety and disease burden (Table 2).



Table 2

Factors associated with quality of life in a univariate approach and in a multivariable model. EUROHIS means/slope together with 95% CI are based on model estimates.

|                             | Univariate                 |                         |         | Multivariable                          |                         |         |    |         |
|-----------------------------|----------------------------|-------------------------|---------|----------------------------------------|-------------------------|---------|----|---------|
|                             | EUROHIS total mean / slope | 95% Confidence Interval | p-value | EUROHIS total model based mean / slope | 95% Confidence Interval | F-value | DF | p-value |
| Age                         | -0.0040                    | (-0.0079, -0.00008)     | 0.046   | -0.00028                               | -0.0042 - 0.0036        | 0.02    | 1  | 0.89    |
| Gender                      |                            |                         | 0.94    |                                        |                         | 0.00    | 1  | 0.99    |
| Female                      | 4.07                       | 4.03 - 4.11             |         | 3.54                                   | 3.38 - 3.69             |         |    |         |
| Male                        | 4.07                       | 3.96 - 4.18             |         | 3.54                                   | 3.36 - 3.72             |         |    |         |
| Education                   |                            |                         | 0.036   |                                        |                         | 4.17    | 2  | 0.016   |
| Vocational school           | 3.83                       | 3.61 - 4.05             |         | 3.37                                   | 3.11 - 3.62             |         |    |         |
| College-level               | 4.05                       | 4.00 - 4.11             |         | 3.59                                   | 3.44 - 3.74             |         |    |         |
| University-level            | 4.11                       | 4.05 - 4.16             |         | 3.66                                   | 3.51 - 3.81             |         |    |         |
| Co-habiting                 |                            |                         | 0.011   |                                        |                         | 5.72    | 1  | 0.017   |
| Yes                         | 4.09                       | 4.05 - 4.13             |         | 3.59                                   | 3.43 - 3.75             |         |    |         |
| No                          | 3.97                       | 3.88 - 4.06             |         | 3.48                                   | 3.31 - 3.66             |         |    |         |
| Smoking                     |                            |                         | 0.39    |                                        |                         |         |    |         |
| Yes                         | 4.02                       | 3.89 - 4.14             |         |                                        |                         |         |    |         |
| No                          | 4.08                       | 4.38 - 4.12             |         |                                        |                         |         |    |         |
| Harmful alcohol consumption |                            |                         | 0.33    |                                        |                         |         |    |         |
| Yes                         | 4.12                       | 4.02 - 4.22             |         |                                        |                         |         |    |         |
| No                          | 4.06                       | 4.02 - 4.11             |         |                                        |                         |         |    |         |
| Body mass index             | -0.020                     | (-0.028, -0.012)        | <0.0001 | -0.018                                 | (-0.025, -0.011)        | 23.91   | 1  | <0.0001 |
| Disease burden <sup>a</sup> |                            |                         | <0.0001 |                                        |                         | 13.35   | 1  | 0.0003  |
| Yes                         | 3.99                       | 3.95 - 4.04             |         | 3.47                                   | 3.31 - 3.63             |         |    |         |
| No                          | 4.22                       | 4.16 - 4.29             |         | 3.61                                   | 3.44 - 3.77             |         |    |         |
| Depression <sup>b</sup>     |                            |                         | <0.0001 |                                        |                         |         |    |         |
| Yes                         | 3.07                       | 2.74 - 3.39             |         |                                        |                         |         |    |         |

1  
2  
3  
4  
5  
6  
7  
8  
9  
10  
11  
12  
13  
14  
15  
16  
17  
18  
19  
20  
21  
22  
23  
24  
25  
26  
27  
28  
29  
30  
31  
32  
33  
34  
35  
36  
37  
38  
39  
40  
41  
42  
43  
44  
45  
46

|                                         |      |             |         |      |             |       |   |         |
|-----------------------------------------|------|-------------|---------|------|-------------|-------|---|---------|
| No                                      | 4.08 | 4.05 - 4.12 |         |      |             |       |   |         |
| Level of anxiety <sup>c</sup>           |      |             | <0.0001 |      |             |       |   |         |
| No                                      | 4.19 | 4.16 - 4.23 |         |      |             |       |   |         |
| Mild                                    | 3.75 | 3.67 - 3.82 |         |      |             |       |   |         |
| Moderate                                | 3.47 | 3.29 - 3.64 |         |      |             |       |   |         |
| Severe                                  | 3.66 | 3.32 - 4.00 |         |      |             |       |   |         |
| Depression and/or anxiety <sup>bd</sup> |      |             |         |      |             | 13.92 | 2 | <0.0001 |
| No depression/ No anxiety               |      |             |         | 3.89 | 3.77 - 4.00 |       |   |         |
| Only anxiety                            |      |             |         | 3.59 | 3.36 - 3.82 |       |   |         |
| Depression and anxiety                  |      |             |         | 3.14 | 2.81 - 3.46 |       |   |         |
| Occupational stress <sup>e</sup>        |      |             | <0.0001 |      |             | 39.30 | 1 | <0.0001 |
| Yes                                     | 3.63 | 3.51 - 3.74 |         | 3.35 | 3.18 - 3.53 |       |   |         |
| No                                      | 4.13 | 4.09 - 4.17 |         | 3.72 | 3.56 - 3.88 |       |   |         |
| 3-shift work                            |      |             | 0.089   |      |             | 0.55  | 1 | 0.46    |
| Yes                                     | 4.16 | 4.02 - 4.10 |         | 3.56 | 3.37 - 3.74 |       |   |         |
| No                                      | 4.06 | 4.05 - 4.28 |         | 3.52 | 3.36 - 3.67 |       |   |         |
| Self-reported sleep quality             |      |             | <0.0001 |      |             | 22.02 | 2 | <0.0001 |
| Very good                               | 4.38 | 4.30 - 4.45 |         | 3.74 | 3.56 - 3.92 |       |   |         |
| Good                                    | 4.05 | 4.05 - 4.14 |         | 3.53 | 3.36 - 3.69 |       |   |         |
| Poor                                    | 3.83 | 3.75 - 3.91 |         | 3.34 | 3.18 - 3.51 |       |   |         |

<sup>a</sup> At least one chronic disease diagnosed by a physician, <sup>b</sup> Defined by Major Depression Inventory (MDI) diagnostic tool (DSM IV), <sup>c</sup> General Anxiety Disorder 7-item Scale (GAD-7), <sup>d</sup> General Anxiety Disorder 7-item Scale (GAD-7), moderate or severe anxiety, <sup>e</sup> Bergen Burnout Indicator 15 (BBI15), at least mild occupational stress, CI = Confidence Interval, DF = Degrees of freedom, EUROHIS = EUROHIS-QOL 8-item index

### Work ability

Work ability was reported excellent by 15.2%, good by 64.9%, moderate by 16.1% and poor by 3.8% of the participants. The WAS mean score among all participants was 8.31 (SD 1.37), and the median was 9.0 (Q1:8.0, Q3:9.0). There was no difference in work ability between genders ( $p=0.11$ ). In the univariate approach, work ability was positively associated with good sleep quality, younger age, lower BMI, university-level education, female gender, and 3-shift work, and negatively associated with disease burden, depression, anxiety and occupational stress.

In the multiway analysis of co-variance, work ability was positively associated with good sleep quality, younger age, lower BMI, and university-level education, and negatively associated with occupational stress and disease burden (Table 3).

Table 3

Factors associated with work ability in a univariate approach and in a multivariable model. WAS means/slope together with 95% CI are based on model estimates.

|                             | Univariate           |                         |         | Multivariable                    |                         |         |    |         |
|-----------------------------|----------------------|-------------------------|---------|----------------------------------|-------------------------|---------|----|---------|
|                             | WAS estimate / slope | 95% Confidence Interval | p-value | WAS model based estimate / slope | 95% Confidence Interval | F-value | DF | p-value |
| Age                         | -0.019               | (-0.029, -0.0090)       | 0.0002  | -0.012                           | (-0.022, -0.0018)       | 5.34    | 1  | 0.021   |
| Gender                      |                      |                         | 0.027   |                                  |                         | 3.36    | 1  | 0.067   |
| Female                      | 8.35                 | 8.24 - 8.46             |         | 7.83                             | 7.43 - 8.23             |         |    |         |
| Male                        | 7.99                 | 7.68 - 8.29             |         | 7.56                             | 7.09 - 8.04             |         |    |         |
| Education                   |                      |                         | 0.0079  |                                  |                         | 4.74    | 2  | 0.0091  |
| Vocational school           | 7.90                 | 7.30 - 8.50             |         | 7.42                             | 6.76 - 8.07             |         |    |         |
| College-level               | 8.18                 | 8.04 - 8.32             |         | 7.70                             | 7.32 - 8.09             |         |    |         |
| University-level            | 8.48                 | 8.33 - 8.63             |         | 7.80                             | 7.58 - 8.37             |         |    |         |
| Co-habiting                 |                      |                         | 0.91    |                                  |                         | 0.04    | 1  | 0.85    |
| Yes                         | 8.31                 | 8.20 - 8.42             |         | 7.69                             | 7.27 - 8.10             |         |    |         |
| No                          | 8.30                 | 8.06 - 8.53             |         | 7.71                             | 7.26 - 8.18             |         |    |         |
| Smoking                     |                      |                         | 0.19    |                                  |                         |         |    |         |
| Yes                         | 8.10                 | 7.76 - 8.44             |         |                                  |                         |         |    |         |
| No                          | 8.33                 | 8.23 - 8.44             |         |                                  |                         |         |    |         |
| Harmful alcohol consumption |                      |                         | 0.35    |                                  |                         |         |    |         |
| Yes                         | 8.43                 | 8.18 - 8.40             |         |                                  |                         |         |    |         |
| No                          | 8.30                 | 8.16 - 8.70             |         |                                  |                         |         |    |         |
| Body mass index             | -0.036               | (-0.057, -0.016)        | 0.0006  | -0.023                           | (-0.042, -0.0041)       | 5.71    | 1  | 0.017   |
| Disease burden <sup>a</sup> |                      |                         | <0.0001 |                                  |                         | 12.23   | 1  | 0.0005  |
| Yes                         | 8.07                 | 7.95 - 8.20             |         | 7.52                             | 7.11 - 7.95             |         |    |         |
| No                          | 8.77                 | 8.60 - 8.93             |         | 7.87                             | 7.44 - 8.30             |         |    |         |
| Depression <sup>b</sup>     |                      |                         | 0.0083  |                                  |                         |         |    |         |

|    |                                         |      |             |         |      |             |       |         |
|----|-----------------------------------------|------|-------------|---------|------|-------------|-------|---------|
| 1  |                                         |      |             |         |      |             |       |         |
| 2  |                                         |      |             |         |      |             |       |         |
| 3  | Yes                                     | 7.11 | 6.22 - 8.01 |         |      |             |       |         |
| 4  | No                                      | 8.33 | 8.23 - 8.43 |         |      |             |       |         |
| 5  | Level of anxiety <sup>c</sup>           |      |             | <0.0001 |      |             |       |         |
| 6  | No                                      | 8.55 | 8.44 - 8.66 |         |      |             |       |         |
| 7  | Mild                                    | 7.59 | 7.38 - 7.81 |         |      |             |       |         |
| 8  | Moderate                                | 7.44 | 6.95 - 7.94 |         |      |             |       |         |
| 9  | Severe                                  | 8.00 | 7.03 - 8.97 |         |      |             |       |         |
| 10 | Depression and/or anxiety <sup>bd</sup> |      |             |         |      | 1.73        | 2     | 0.17    |
| 11 | No depression / No anxiety              |      |             |         | 8.02 | 7.72 - 8.31 |       |         |
| 12 | Only anxiety                            |      |             |         | 7.67 | 7.07 - 8.27 |       |         |
| 13 | Depression and anxiety                  |      |             |         | 7.41 | 6.57 - 8.25 |       |         |
| 14 | Occupational stress <sup>e</sup>        |      |             | <0.0001 |      |             | 29.80 | 1       |
| 15 | Yes                                     | 7.47 | 7.18 - 7.76 |         | 7.28 | 6.82 - 7.74 |       | <0.0001 |
| 16 | No                                      | 8.47 | 8.37 - 8.57 |         | 8.12 | 7.70 - 8.54 |       |         |
| 17 | 3-shift work                            |      |             | 0.0040  |      |             | 3.75  | 1       |
| 18 | Yes                                     | 8.74 | 8.43 - 9.05 |         | 7.84 | 7.36 - 8.33 |       | 0.053   |
| 19 | No                                      | 8.26 | 8.15 - 8.36 |         | 7.55 | 7.16 - 7.95 |       |         |
| 20 | Self-reported sleep quality             |      |             | <0.0001 |      |             | 14.44 | 2       |
| 21 | Very good                               | 9.00 | 8.73 - 9.25 |         | 8.13 | 7.66 - 8.60 |       | <0.0001 |
| 22 | Good                                    | 8.34 | 8.22 - 8.47 |         | 7.68 | 7.25 - 8.10 |       |         |
| 23 | Poor                                    | 7.80 | 7.59 - 8.00 |         | 7.29 | 6.86 - 7.72 |       |         |
| 24 |                                         |      |             |         |      |             |       |         |
| 25 |                                         |      |             |         |      |             |       |         |
| 26 |                                         |      |             |         |      |             |       |         |
| 27 |                                         |      |             |         |      |             |       |         |
| 28 |                                         |      |             |         |      |             |       |         |
| 29 |                                         |      |             |         |      |             |       |         |
| 30 |                                         |      |             |         |      |             |       |         |
| 31 |                                         |      |             |         |      |             |       |         |
| 32 |                                         |      |             |         |      |             |       |         |
| 33 |                                         |      |             |         |      |             |       |         |
| 34 |                                         |      |             |         |      |             |       |         |
| 35 |                                         |      |             |         |      |             |       |         |
| 36 |                                         |      |             |         |      |             |       |         |
| 37 |                                         |      |             |         |      |             |       |         |
| 38 |                                         |      |             |         |      |             |       |         |
| 39 |                                         |      |             |         |      |             |       |         |
| 40 |                                         |      |             |         |      |             |       |         |
| 41 |                                         |      |             |         |      |             |       |         |
| 42 |                                         |      |             |         |      |             |       |         |
| 43 |                                         |      |             |         |      |             |       |         |
| 44 |                                         |      |             |         |      |             |       |         |
| 45 |                                         |      |             |         |      |             |       |         |
| 46 |                                         |      |             |         |      |             |       |         |

<sup>a</sup> At least one chronic disease diagnosed by a physician, <sup>b</sup> Defined by Major Depression Inventory (MDI) diagnostic tool (DSM IV), <sup>c</sup> General Anxiety Disorder 7-item Scale (GAD-7), <sup>d</sup> General Anxiety Disorder 7-item Scale (GAD-7), moderate or severe anxiety, <sup>e</sup> Bergen Burnout Indicator 15 (BBI15), at least mild occupational stress, CI= Confidence Interval, DF = Degrees of freedom, WAS = Work Ability Score

## DISCUSSION

In this study, we managed to show that occupational stress, self-reported sleep quality, and disease burden were strongly associated with both QoL and work ability in public sector employees. In addition, QoL was tightly associated with BMI and depression and / or anxiety. To our knowledge, few studies have evaluated QoL and work ability simultaneously among apparently healthy, working-age individuals, with information about a wide range of factors potentially influencing these two variables.

Occupational stress was the factor most strongly associated with both QoL and work ability in this study. It is well known, that job strain is an important factor affecting employees' health and well-being.[3,27,28] Occupational stress is known to be associated, for example, with poor sleep quality [29], lower work ability [4] and mental health problems.[30] Furthermore, work stress was found to be associated with elevated mortality rates in patients with cardiometabolic disease in a large multicohort study.[31] Work stress has also been found to have a negative association with QoL in several studies.[3,27] The interesting finding in our study was that the association of occupational stress with QoL and WAS was strong, regardless of the fact that our study population had low rates of occupational stress. Only 10.6% of the participants in our study had at least mild occupational stress symptoms, and severe symptoms were very rare. It is thus possible that even low levels of occupational stress can have an important influence on a person's work ability and QoL. These results highlight the need for screening and handling of work stress among municipal employees.

Self-reported sleep quality was tightly associated with both QoL and work ability in this study. A negative association between poor sleep quality and QoL has previously been demonstrated among patients with sleep disorders and other medical conditions [32–35], and studies on shift workers have shown a clear association between sleep quality and QoL.[36,37] Furthermore, in a previous work on higher education students, Marques et al. showed that self-reported sleep quality remained a significant predictor of most aspects of QoL, regardless of the presence of psychopathological

1  
2  
3 symptoms, such as depression.[5] Sleep problems have in previous literature also been linked to  
4  
5 poorer work ability and an increased rate of sickness absence.[38,39] In addition, Ng et al. have  
6  
7 shown a positive association between good sleep quality and work ability among Hong Kong  
8  
9 construction workers.[6] However, in this study we managed to show that self-reported sleep quality  
10  
11 is significantly associated with both QoL and work ability among apparently healthy employees not  
12  
13 restricted to a specific occupation and working mainly in regular morning shifts. The associations  
14  
15 remained significant also in the multivariable models, where many potential confounding factors  
16  
17 could be taken into account.  
18  
19

20  
21  
22 Disease burden, higher BMI and lower educational level were negatively associated with both QoL  
23  
24 and work ability in this study, as well as in previous literature. Chronic diseases are known to have a  
25  
26 negative association with QoL [1] and with work ability.[2,40] Lower BMI has been linked to better  
27  
28 QoL [41] and to better work ability [42,43], and higher education has been positively associated with  
29  
30 QoL [44] and with work ability.[45] In our study, as well as in previous literature, older age was  
31  
32 associated with poorer work ability [42,46], but no significant association was found between age  
33  
34 and QoL. This finding is consistent with the Finnish reference values for the EUROHIS-QOL 8-item  
35  
36 index.[47] Furthermore, cohabiting had a significant positive association with QoL in our study, as  
37  
38 has previously been observed in a population based study in Sweden.[48] Cohabiting has previously  
39  
40 been linked to better health and work ability, for example, in an unemployed population [49], but in  
41  
42 our setting, where only active work force was studied, there was no significant association between  
43  
44 cohabiting and work ability.  
45  
46  
47  
48

49 An interesting finding in our study was that depression and / or anxiety was strongly associated with  
50  
51 QoL but did not have a significant association with work ability in the multivariable model.

52  
53 Depression and anxiety are known to have a negative impact on QoL [50–52], but depression also  
54  
55 affects a person's ability to work.[2,53] However, depression often leads to sickness absence, which  
56  
57 means that these people are not in the active work force. In our study population, depression and  
58  
59  
60

1  
2  
3 anxiety were relatively rare conditions, and most of the cases were mild. Only 9 (1.3%) of the  
4  
5 participants met the diagnostic criteria for major depression and 33 (4.6%) of the participants were  
6  
7 categorized as moderately or severely anxious. It is known that not all depressive patients consider  
8  
9 themselves unable to work.[53] These patients may benefit from the schedule and routine of work  
10  
11 life and do not want to seek sick leave, while depression still affects their QoL. In the Finnish Current  
12  
13 Care Guidelines for depression, sick leave is not recommended in mild depression and the need for  
14  
15 sick leave in moderate depression should be evaluated individually.[54] According to these  
16  
17 recommendations, those depressive patients whose work ability is not affected should remain in the  
18  
19 active work force. Furthermore, as the prevalence of depression and anxiety in our study population  
20  
21 was low, the generalizability of these results can be questioned.  
22  
23  
24  
25

26  
27 In this study, 3-shift work was not significantly associated either with QoL or with work ability in the  
28  
29 multivariable models. In the univariate approach, the work ability of the 3-shift workers was better  
30  
31 ( $p=0.0040$ ), but no significant difference was seen in QoL. Somewhat surprisingly, 3-shift work did  
32  
33 not seem to have any adverse effects on the participants' well-being in our study. There was no  
34  
35 difference in sleep quality or occupational stress compared to the regular morning shift workers.  
36  
37 Almost all 3-shift workers in our study were women working as nurses or social workers. Their mean  
38  
39 age was 45.6 years, which is 3.5 years younger than the mean age of the whole study population. In  
40  
41 addition to the younger age, one possible explanation for their well-being is that they may have  
42  
43 voluntarily chosen to work in shifts and feel that it is a suitable way of working for them. Those shift  
44  
45 workers who have had health problems or difficulties with sleep due to shift work may have changed  
46  
47 to day work.[55] Another unexpected result in this work was that harmful alcohol consumption did  
48  
49 not have adverse effects on sleep quality, QoL or work ability. However, even though there were 101  
50  
51 (14.2%) participants that fulfilled the definition of "harmful drinking" in the AUDIT-C, heavy drinking  
52  
53 was very rare in this predominantly female, active work force population. We assume that these  
54  
55 people may consume alcohol mainly during weekends, which diminishes the effects on everyday life  
56  
57 and work.  
58  
59  
60



1  
2  
3 We acknowledge some limitations of the study. We cannot determine the causality of the found  
4 associations because of the cross-sectional nature of the study. A possible healthy worker effect [56]  
5 can be present because only subjects in the active work force were studied. In addition, the initial  
6 response rate in the first part of the study in 2014 was only 32.5% (and 84.9% of them attended the  
7 study in 2015). It is known that response rates in e-mail surveys tend to be lower than in mail  
8 surveys [57], but it can nevertheless cause selection bias. It is possible that the healthiest part of the  
9 work force is also the most willing to attend voluntary health surveys, which may result in the  
10 possibility that our results reflect the situation in the mainly healthy section of the work force.  
11 However, the mean annual rate of sickness absence days did not vary significantly between the  
12 study participants and the non-participants on the included employment sectors. According to the  
13 records obtained from the city of Pori, the mean incidence of sickness absence days was 11 days per  
14 year among the study participants during the two year time period (2014 – 2015).[58] The mean  
15 sickness absence rate among all employees of the selected work units was 12 days according to the  
16 personnel report of the city of Pori in 2015. [59] The gender distribution in our study (89% females)  
17 resembles the distribution among employees of the city of Pori and is close to the gender  
18 distribution of the large Finnish prospective study on the public sector employees.[60] The  
19 information about alcohol consumption was collected by self-assessment, which may be influenced  
20 by social desirability. In addition, we unfortunately do not have data of possible menopausal  
21 symptoms, which may have affected our results in women.

22  
23  
24  
25  
26  
27  
28  
29  
30  
31  
32  
33  
34  
35  
36  
37  
38  
39  
40  
41  
42  
43  
44  
45  
46  
47  
48  
49  
50  
51  
52  
53  
54  
55  
56  
57  
58  
59  
60  
The strengths of our study are that we could take into account several aspects associated with the  
employees' QoL and work ability. All questionnaires were completed by the participants at home  
before the examination was performed. In this study, the approaches to sleep quality, QoL and work  
ability were all subjective, which emphasizes the importance of personal experience in evaluating  
these factors. We assessed self-reported sleep quality and work ability with single questions. This  
approach was chosen over longer questionnaires because a single question could also be used at a  
normal physician's appointment in primary or occupational health care for the evaluation of these

1  
2  
3 factors. The self-reported sleep quality question we used was from the Pittsburgh Sleep Quality  
4 Index (PSQI), and it has previously been shown to be closely related with QoL.[5] With this question  
5  
6 we showed a clear association of sleep quality with QoL and with work ability. However, it would be  
7  
8 interesting to further assess this connection in a similar population with a more detailed  
9  
10 questionnaire to determine whether the different components of sleep have different impacts on  
11  
12 QoL and work ability. The WAS score we used for the evaluation of work ability has been shown to  
13  
14 have a strong association with the Work Ability Index and is reliable in evaluating work ability.[61]  
15  
16 WAS has also been shown to predict disability pension and long-term sickness absence according to  
17  
18 a Finnish register-based study.[62] The associations of self-reported sleep quality with both QoL and  
19  
20 with work ability were clear and in line with previous literature even when studied with these simple  
21  
22 tools.  
23  
24  
25  
26  
27

## 28 **CONCLUSIONS**

29  
30  
31 In this paper we showed that occupational stress and self-reported sleep quality are strongly  
32  
33 associated with both QoL and work ability among Finnish public sector employees. According to our  
34  
35 results, even a low level of occupational stress has a significant negative association with QoL and  
36  
37 work ability. These findings highlight the need for screening and handling work stress and sleep  
38  
39 problems in occupational and primary health care. We suggests that short, self-reported assessment  
40  
41 tools could be used for this purpose.  
42  
43  
44  
45

## 46 **CONTRIBUTORS**

47  
48  
49 EB, EL, SM, PR and PK contributed to the conception or design of the work, and to the acquisition,  
50  
51 analysis or interpretation of data for the work. EB and PK drafted the manuscript. All authors  
52  
53 critically revised the manuscript, gave final approval, and agreed to be accountable for all aspects of  
54  
55 work ensuring integrity and accuracy.  
56  
57

## 58 **ACKNOWLEDGEMENTS**

1  
2  
3 Not applicable.  
4  
5

## 6 **FUNDING**

7  
8  
9 This study was supported by the Hospital District of Satakunta, the Hospital District of Southwest  
10  
11 Finland and Etera Mutual Pension Insurance Company.  
12  
13

## 14 **DECLARATION OF COMPETING INTERESTS**

15  
16  
17 The authors declare that they have no competing interests.  
18  
19

## 20 **ETHICAL APPROVAL**

21  
22  
23 All procedures performed in studies involving human participants were in accordance with the  
24  
25 ethical standards of the institutional and/or national research committee and with the 1964 Helsinki  
26  
27 Declaration and its later amendments or comparable ethical standards. The study protocol and  
28  
29 consent forms were reviewed and approved by the Ethics Committee of the Hospital District of  
30  
31 Southwest Finland (ETMK 43/180/2013).  
32  
33  
34

## 35 **INFORMED CONSENT**

36  
37  
38 Written informed consent was obtained from all individual participants included in the study.  
39  
40  
41

## 42 **AVAILABILITY OF DATA**

43  
44  
45 The datasets used and/or analysed during the current study are available from the corresponding  
46  
47 author on request.  
48  
49

## 50 **REFERENCES**

- 51  
52  
53 1 Schmidt S, Mühlan H, Power M. The EUROHIS-QOL 8-item index: Psychometric results of a  
54  
55 cross-cultural field study. *Eur J Public Health* 2006;**16**:420–8. doi:10.1093/eurpub/cki155  
56  
57  
58 2 Leino-Arjas P, Kaila-Kangas L, Heliövaara M, *et al*. The Relation of Co-occurring  
59  
60

- 1  
2  
3 Musculoskeletal Pain and Depressive Symptoms With Work Ability. *J Occup Environ Med*  
4  
5 2013;**55**:1281–5. doi:10.1097/jom.0b013e3182a4ffc4  
6  
7
- 8 3 Sarafis P, Rousaki E, Tsounis A, *et al*. The impact of occupational stress on nurses' caring  
9 behaviors and their health related quality of life. *BMC Nurs* 2016;**15**:1–9.  
10  
11 doi:10.1186/s12912-016-0178-y  
12  
13  
14
- 15 4 Yong M, Nasterlack M, Pluto R-P, *et al*. Occupational stress perception and its potential  
16 impact on work ability. *Work* Published Online First: 2013. doi:10.3233/WOR-121556  
17  
18  
19
- 20 5 Marques DR, Meia-Via AMS, da Silva CF, *et al*. Associations between sleep quality and  
21 domains of quality of life in a non-clinical sample: results from higher education students.  
22  
23 *Sleep Heal* 2017;**3**:348–56. doi:10.1016/j.sleh.2017.07.004  
24  
25  
26
- 27 6 Ng JYK, Chan AHS. The work ability of Hong Kong construction workers in relation to  
28 individual and work-related factors. *Int J Environ Res Public Health* 2018;**15**.  
29  
30  
31  
32  
33  
34  
35  
36  
37  
38  
39  
40  
41
- 42 8 Idler EL, Benyamini Y. Self-rated health and mortality: a review of twenty-seven community  
43 studies. *J Health Soc Behav* 1997;**38**:21–37. <http://www.ncbi.nlm.nih.gov/pubmed/9097506>  
44  
45  
46  
47  
48  
49  
50  
51  
52  
53
- 54 9 Ilmarinen J. The Work Ability Index (WAI). *Occup Med (Chic Ill)* 2006;**57**:160–160.  
55  
56  
57  
58  
59  
60
- 10 10 Buysse DJ, Reynolds CF, Monk TH, *et al*. The Pittsburgh sleep quality index: A new instrument  
for psychiatric practice and research. *Psychiatry Res* Published Online First: 1989.  
doi:10.1016/0165-1781(89)90047-4

- 1  
2  
3 11 Bech P, Timmerby N, Martiny K, *et al.* Psychometric evaluation of the Major Depression  
4 Inventory ( MDI ) as depression severity scale using the LEAD ( Longitudinal Expert  
5 Assessment of All Data ) as index of validity. *BMC Psychiatry* 2015;:1–7. doi:10.1186/s12888-  
6 015-0529-3  
7  
8  
9  
10  
11  
12  
13 12 Spitzer RL, Kroenke K, Williams JBW, *et al.* A Brief Measure for Assessing Generalized Anxiety  
14 Disorder. 2006;**166**:1092–7.  
15  
16  
17  
18 13 Näätänen P, Aro A, Mathiesen SB, *et al.* *Bergen Burnout Indicator 15*. Helsinki: : Edita 2003.  
19  
20  
21 14 Bergman E, Löyttyniemi E, Rautava P, *et al.* Ideal cardiovascular health and quality of life  
22 among Finnish municipal employees. *Prev Med Reports* 2019;**15**:100922.  
23 doi:10.1016/j.pmedr.2019.100922  
24  
25  
26  
27  
28 15 Chiu MC, Wang MJJ, Lu CW, *et al.* Evaluating work ability and quality of life for clinical nurses  
29 in Taiwan. *Nurs Outlook* 2007;**55**:318–26. doi:10.1016/j.outlook.2007.07.002  
30  
31  
32  
33  
34 16 Sörensen LE, Pekkonen MM, Männikkö KH, *et al.* Associations between work ability, health-  
35 related quality of life, physical activity and fitness among middle-aged men. *Appl Ergon*  
36 2008;**39**:786–91. doi:10.1016/j.apergo.2007.11.001  
37  
38  
39  
40  
41 17 Veromaa V, Kautiainen H, Saxen U, *et al.* Ideal cardiovascular health and psychosocial risk  
42 factors among Finnish female municipal workers. *Scand J Public Health* 2017;**45**:50–6.  
43 doi:10.1177/1403494816677661  
44  
45  
46  
47  
48  
49 18 Power M. Development of A Common Instrument for Quality of Life. *EUROHIS Dev Common*  
50 *Instruments Heal Surv* 2003;**57**:145–  
51 59.[http://www.euro.who.int/en/publications/abstracts/eurohis-developing-common-](http://www.euro.who.int/en/publications/abstracts/eurohis-developing-common-instruments-for-health-surveys)  
52  
53  
54  
55  
56  
57  
58  
59 19 WHOQOL Group. the World Health Organization Quality of Life Assessment (Whoqol):  
60

- 1  
2  
3 Development and General Psychometric Properties\* the Whoqol Group{. *Soc Sci Med*  
4  
5 1998;**46**:1569–85. doi:10.1016/S0277-9536(98)00009-4  
6  
7  
8  
9 20 Gould R, Ilmarinen J, Jarvisalo J, *et al.* *Dimensions of Work Ability*. 2008.  
10  
11 doi:10.1108/02656710210415668  
12  
13  
14 21 Carpenter JS, Andrykowski MA. Psychometric evaluation of the Pittsburgh Sleep Quality  
15  
16 Index. *J Psychosom Res* Published Online First: 1998. doi:10.1016/S0022-3999(97)00298-5  
17  
18  
19 22 Gentili A, Weiner DK, Kuchibhatla M, *et al.* The Test-retest reliability of the Pittsburgh Sleep  
20  
21 Quality Index in nursing home residents. 1995;**43**:1317–8.  
22  
23  
24 23 Bech P, Rasmussen NA, Olsen LR, *et al.* The sensitivity and specificity of the Major Depression  
25  
26 Inventory, using the Present State Examination as the index of diagnostic validity. *J Affect*  
27  
28 *Disord* 2001;**66**:159–64. doi:10.1016/S0165-0327(00)00309-8  
29  
30  
31  
32 24 Bush K, Kivlahan DR, McDonell MB, *et al.* The AUDIT alcohol consumption questions (AUDIT-  
33  
34 C). *Arch Intern Med* 1998;**158**:1789–95. doi:10.1097/00000374-199811000-00034  
35  
36  
37 25 Aalto M, Tuunanen M, Sillanaukee P, *et al.* Effectiveness of structured questionnaires for  
38  
39 screening heavy drinking in middle-aged women. *Alcohol Clin Exp Res* 2006;**30**:1884–8.  
40  
41 doi:10.1111/j.1530-0277.2006.00233.x  
42  
43  
44  
45 26 Tuunanen M, Aalto M, Seppä K. Binge drinking and its detection among middle-aged men  
46  
47 using AUDIT, AUDIT-C and AUDIT-3. *Drug Alcohol Rev* 2007;**26**:295–9.  
48  
49 doi:10.1080/09595230701247756  
50  
51  
52 27 Yang X, Ge C, Hu B, *et al.* Relationship between quality of life and occupational stress among  
53  
54 teachers. *Public Health* 2009;**123**:750–5. doi:10.1016/j.puhe.2009.09.018  
55  
56  
57 28 Lerner DJ, Levine S, Malspeis S, *et al.* Job strain and health-related quality of life in a national  
58  
59 sample. *Am J Public Health* 1994;**84**:1580–5. doi:10.2105/AJPH.84.10.1580  
60

- 1  
2  
3 29 Knudsen HK, Ducharme LJ, Roman PM. Job stress and poor sleep quality: Data from an  
4 American sample of full-time workers. *Soc Sci Med* 2007;**64**:1997–2007.  
5  
6 doi:10.1016/j.socscimed.2007.02.020  
7  
8  
9  
10  
11 30 Chen W-Q, Wong T-W, Yu T-S. Review Article: Influence of occupational stress on mental  
12 health among Chinese off-shore oil workers. *Scand J Soc Med* 2009;**37**:766–73.  
13  
14 doi:10.1177/1403494809341097  
15  
16  
17  
18 31 Kivimäki M, Pentti J, Ferrie JE, *et al.* Work stress and risk of death in men and women with  
19 and without cardiometabolic disease: a multicohort study. *Lancet Diabetes Endocrinol*  
20 2018;**7**–9. doi:10.1016/S2213-8587(18)30140-2  
21  
22  
23  
24  
25 32 LeBlanc M, Beaulieu-Bonneau S, Mérette C, *et al.* Psychological and health-related quality of  
26 life factors associated with insomnia in a population-based sample. *J Psychosom Res*  
27 2007;**63**:157–66. doi:10.1016/j.jpsychores.2007.03.004  
28  
29  
30  
31  
32  
33 33 Reimer MA, Flemons WW. Quality of life in sleep disorders. *Sleep Med Rev* 2003;**7**:335–49.  
34  
35 doi:10.1053/smr.2001.0220  
36  
37  
38  
39 34 Liu L, Fiorentino L, Rissling M, *et al.* Decreased Health-Related Quality of Life in Women With  
40 Breast Cancer Is Associated With Poor Sleep. *Behav Sleep Med* 2013;**11**:189–206.  
41  
42 doi:10.1080/15402002.2012.660589  
43  
44  
45  
46 35 Liu J-C, Hung H-L, Shyu Y-K, *et al.* The Impact of Sleep Quality and Daytime Sleepiness on  
47 Global Quality of Life in Community-Dwelling Patients With Heart Failure. *J Cardiovasc Nurs*  
48 2011;**24**:99–105. doi:10.1097/JCN.0b013e3181ed7d12  
49  
50  
51  
52  
53 36 Palhares V de C, Corrente JE, Matsubara BB. Association between sleep quality and quality of  
54 life in nursing professionals working rotating shifts. *Rev Saude Publica* 2014;**48**:594–601.  
55  
56 doi:10.1590/S0034-8910.2014048004939  
57  
58  
59  
60

- 1  
2  
3 37 Nena E, Katsaouni M, Steiropoulos P, *et al.* Effect of Shift Work on Sleep , Health , and Quality  
4 of Life of Health-care Workers. *Indian J Occup Env Med* 2018;**22**:29–34.  
5  
6  
7  
8 doi:10.4103/ijoem.IJOEM  
9  
10  
11 38 Lallukka T, Kaikkonen R, Härkänen T, *et al.* Sleep and Sickness Absence: A Nationally  
12 Representative Register-Based Follow-Up Study. *Sleep* 2014;**37**:1413–25.  
13  
14  
15  
16 doi:10.5665/sleep.3986  
17  
18 39 Lian Y, Xiao J, Liu Y, *et al.* Associations between insomnia, sleep duration and poor work  
19 ability. *J Psychosom Res* 2015;**78**:45–51. doi:10.1016/j.jpsychores.2014.09.009  
20  
21  
22  
23 40 Jędryka-Góral A, Bownik I, Michalak JM, *et al.* Work Ability in Ageing Workers Suffering From  
24 Chronic Diseases. *Int J Occup Saf Ergon* 2015;**12**:17–30.  
25  
26  
27  
28 doi:10.1080/10803548.2006.11076665  
29  
30  
31 41 Kroes M, Osei-Assibey G, Baker-Searle R, *et al.* Impact of weight change on quality of life in  
32 adults with overweight/obesity in the United States: a systematic review. *Curr Med Res Opin*  
33  
34  
35  
36 2015;**32**:485–508. doi:10.1185/03007995.2015.1128403  
37  
38  
39 42 Bridger RS, Bennett AI. Age and BMI interact to determine work ability in seafarers. *Occup*  
40  
41  
42  
43  
44 43 Andersen LL, Izquierdo M, Sundstrup E. Overweight and obesity are progressively associated  
45  
46  
47  
48  
49  
50  
51  
52  
53  
54 44 Mielck A, Reitmeir P, Vogelmann M, *et al.* Impact of educational level on health-related  
55  
56  
57  
58  
59  
60  
0  
quality of life ( HRQL ): results from Germany based on the EuroQol 5D ( EQ-5D ). *Eur J Public*  
*Health* 2011;**23**:45–50. doi:10.1093/eurpub/ckr206



- 1  
2  
3 45 Martimo KP, Varonen H, Husman K, *et al.* Factors associated with self-assessed work ability.  
4  
5 *Occup Med (Chic Ill)* 2007;**57**:380–2. doi:10.1093/occmed/kqm028  
6  
7  
8  
9 46 Pohjonen T. Perceived work ability of home care workers in relation to individual and work-  
10 related factors in different age groups. *Occup Med (Chic Ill)* 2001;**51**:209–17.  
11  
12 doi:10.1093/occmed/51.3.209  
13  
14  
15  
16 47 Koskinen S, Lundqvist A, Ristiluoma N. *Terveys, toimintakyky ja hyvinvointi Suomessa 2011.*  
17  
18 2012.  
19  
20 [http://www.julkari.fi/bitstream/handle/10024/90832/Rap068\\_2012\\_netti.pdf?sequence=1](http://www.julkari.fi/bitstream/handle/10024/90832/Rap068_2012_netti.pdf?sequence=1)  
21  
22  
23  
24 48 Helena Michelson, Christina Bolund,. Health-related Quality of Life Measured by the EORTC  
25  
26 QLQ-C30: Reference Values From a Large Sample of the Swedish Population. *Acta Oncol*  
27  
28 (*Madr*) 2002;**39**:477–84. doi:10.1080/028418600750013384  
29  
30  
31  
32 49 Hult M, Pietilä AM, Koponen P, *et al.* Association between good work ability and health  
33 behaviours among unemployed: A cross-sectional survey. *Appl Nurs Res* 2018;**43**:86–92.  
34  
35 doi:10.1016/j.apnr.2018.07.008  
36  
37  
38  
39 50 Saarni SI, Suvisaari J, Sintonen H, *et al.* Impact of psychiatric disorders on health-related  
40 quality of life: General population survey. *Br J Psychiatry* 2007;**190**:326–32.  
41  
42 doi:10.1192/bjp.bp.106.025106  
43  
44  
45  
46 51 Palacin C, Martinez-Alonso M, Codony M, *et al.* Use of mental health services in Europe:  
47 results from the European Study of the Epidemiology of Mental Disorders (ESEMeD) project.  
48  
49 *Acta Psychiatr Scand* 2004;**109**:47–54. doi:10.1111/j.1600-0047.2004.00330.x  
50  
51  
52  
53  
54 52 Da Rocha NS, Power MJ, Bushnell DM, *et al.* The EUROHIS-QOL 8-item index: Comparative  
55 psychometric properties to its parent WHOQOL-BREF. *Value Heal* 2012;**15**:449–57.  
56  
57 doi:10.1016/j.jval.2011.11.035  
58  
59  
60

- 1  
2  
3 53 Elinson L, Houck P, Marcus SC, *et al.* Depression and the Ability to Work. *Psychiatr Serv*  
4  
5 2003;**55**:29–34. doi:10.1176/appi.ps.55.1.29  
6  
7  
8  
9 54 Isometsä E, Kinnunen E, Kivekäs T, *et al.* Depression. Current Care Guidelines. Working group  
10 set up by the Finnish Medical Society Duodecim and the Finnish Psychiatric Association.  
11 Finnish Curr. Care Guidel. 2016.www.kaypahoito.fi (accessed 5 Sep 2019).  
12  
13  
14  
15  
16 55 Linton SJ, Kecklund G, Franklin KA, *et al.* The effect of the work environment on future sleep  
17 disturbances: A systematic review. *Sleep Med Rev* 2015;**23**:10–9.  
18 doi:10.1016/j.smrv.2014.10.010  
19  
20  
21  
22  
23 56 Li C, Sung E. A review of the healthy worker effect in occupational epidemiology. *Occup Med*  
24 (*Chic Ill*) 1999;**49**:225–9.  
25  
26  
27  
28  
29 57 Shih T, Fan X. Comparing response rates in e-mail and paper surveys : A meta-analysis. *Educ*  
30 *Res Rev* 2009;**4**:26–40. doi:10.1016/j.edurev.2008.01.003  
31  
32  
33  
34 58 Vuorio T, Suominen S, Kautiainen H, *et al.* Determinants of sickness absence rate among  
35 Finnish municipal employees. *Scand J Prim Health Care* 2019;**37**:3–9.  
36 doi:10.1080/02813432.2019.1568710  
37  
38  
39  
40  
41  
42 59 Porin kaupunki Henkilöstöraportti 2015. 2015.https://docplayer.fi/28278945-Porin-kaupunki-  
43 henkilöstöraportti-2015.html  
44  
45  
46  
47 60 Kouvonen A, Kivimäki M, Väänänen A, *et al.* Job strain and adverse health behaviors: The  
48 Finnish public sector study. *J Occup Environ Med* 2007;**49**:68–74.  
49 doi:10.1097/JOM.0b013e31802db54a  
50  
51  
52  
53  
54 61 Fassi M El, Bocquet V, Majery N, *et al.* Work ability assessment in a worker population :  
55 comparison and determinants of Work Ability Index and Work Ability score. *BMC Public*  
56 *Health* 2013;**13**:1–10.  
57  
58  
59  
60

- 1  
2  
3 62 Kinnunen U, Nätti J. Work ability score and future work ability as predictors of register-based  
4 disability pension and long-term sickness absence: A three-year follow-up study. *Scand J*  
5  
6  
7 *Public Health* 2018;**46**:321–30. doi:10.1177/1403494817745190  
8  
9  
10  
11  
12  
13  
14  
15  
16  
17  
18  
19  
20  
21  
22  
23  
24  
25  
26  
27  
28  
29  
30  
31  
32  
33  
34  
35  
36  
37  
38  
39  
40  
41  
42  
43  
44  
45  
46  
47  
48  
49  
50  
51  
52  
53  
54  
55  
56  
57  
58  
59  
60

For peer review only

1  
2  
3  
4  
5  
6  
7  
8  
9  
10  
11  
12  
13  
14  
15  
16  
17  
18  
19  
20  
21  
22  
23  
24  
25  
26  
27  
28  
29  
30  
31  
32  
33  
34  
35  
36  
37  
38  
39  
40  
41  
42  
43  
44  
45  
46  
47  
48  
49  
50  
51  
52  
53  
54  
55  
56  
57  
58  
59  
60STROBE Statement—Checklist of items that should be included in reports of *cross-sectional studies*

|                              | <b>Item No</b> | <b>Recommendation</b>                                                                                                                                                                                                                                                                                                                                                                                         |
|------------------------------|----------------|---------------------------------------------------------------------------------------------------------------------------------------------------------------------------------------------------------------------------------------------------------------------------------------------------------------------------------------------------------------------------------------------------------------|
| <b>Title and abstract</b>    | 1              | (a) Indicate the study's design with a commonly used term in the title or the abstract<br>(b) Provide in the abstract an informative and balanced summary of what was done and what was found                                                                                                                                                                                                                 |
| <b>Introduction</b>          |                |                                                                                                                                                                                                                                                                                                                                                                                                               |
| Background/rationale         | 2              | Explain the scientific background and rationale for the investigation being reported                                                                                                                                                                                                                                                                                                                          |
| Objectives                   | 3              | State specific objectives, including any prespecified hypotheses                                                                                                                                                                                                                                                                                                                                              |
| <b>Methods</b>               |                |                                                                                                                                                                                                                                                                                                                                                                                                               |
| Study design                 | 4              | Present key elements of study design early in the paper                                                                                                                                                                                                                                                                                                                                                       |
| Setting                      | 5              | Describe the setting, locations, and relevant dates, including periods of recruitment, exposure, follow-up, and data collection                                                                                                                                                                                                                                                                               |
| Participants                 | 6              | (a) Give the eligibility criteria, and the sources and methods of selection of participants                                                                                                                                                                                                                                                                                                                   |
| Variables                    | 7              | Clearly define all outcomes, exposures, predictors, potential confounders, and effect modifiers. Give diagnostic criteria, if applicable                                                                                                                                                                                                                                                                      |
| Data sources/<br>measurement | 8*             | For each variable of interest, give sources of data and details of methods of assessment (measurement). Describe comparability of assessment methods if there is more than one group                                                                                                                                                                                                                          |
| Bias                         | 9              | Describe any efforts to address potential sources of bias                                                                                                                                                                                                                                                                                                                                                     |
| Study size                   | 10             | Explain how the study size was arrived at                                                                                                                                                                                                                                                                                                                                                                     |
| Quantitative variables       | 11             | Explain how quantitative variables were handled in the analyses. If applicable, describe which groupings were chosen and why                                                                                                                                                                                                                                                                                  |
| Statistical methods          | 12             | (a) Describe all statistical methods, including those used to control for confounding<br>(b) Describe any methods used to examine subgroups and interactions<br>(c) Explain how missing data were addressed<br>(d) If applicable, describe analytical methods taking account of sampling strategy<br>(e) Describe any sensitivity analyses                                                                    |
| <b>Results</b>               |                |                                                                                                                                                                                                                                                                                                                                                                                                               |
| Participants                 | 13*            | (a) Report numbers of individuals at each stage of study—eg numbers potentially eligible, examined for eligibility, confirmed eligible, included in the study, completing follow-up, and analysed<br>(b) Give reasons for non-participation at each stage<br>(c) Consider use of a flow diagram                                                                                                               |
| Descriptive data             | 14*            | (a) Give characteristics of study participants (eg demographic, clinical, social) and information on exposures and potential confounders<br>(b) Indicate number of participants with missing data for each variable of interest                                                                                                                                                                               |
| Outcome data                 | 15*            | Report numbers of outcome events or summary measures                                                                                                                                                                                                                                                                                                                                                          |
| Main results                 | 16             | (a) Give unadjusted estimates and, if applicable, confounder-adjusted estimates and their precision (eg, 95% confidence interval). Make clear which confounders were adjusted for and why they were included<br>(b) Report category boundaries when continuous variables were categorized<br>(c) If relevant, consider translating estimates of relative risk into absolute risk for a meaningful time period |
| Other analyses               | 17             | Report other analyses done—eg analyses of subgroups and interactions, and sensitivity analyses                                                                                                                                                                                                                                                                                                                |

|                          |    |                                                                                                                                                                            |
|--------------------------|----|----------------------------------------------------------------------------------------------------------------------------------------------------------------------------|
| <b>Discussion</b>        |    |                                                                                                                                                                            |
| Key results              | 18 | Summarise key results with reference to study objectives                                                                                                                   |
| Limitations              | 19 | Discuss limitations of the study, taking into account sources of potential bias or imprecision. Discuss both direction and magnitude of any potential bias                 |
| Interpretation           | 20 | Give a cautious overall interpretation of results considering objectives, limitations, multiplicity of analyses, results from similar studies, and other relevant evidence |
| Generalisability         | 21 | Discuss the generalisability (external validity) of the study results                                                                                                      |
| <b>Other information</b> |    |                                                                                                                                                                            |
| Funding                  | 22 | Give the source of funding and the role of the funders for the present study and, if applicable, for the original study on which the present article is based              |

\*Give information separately for exposed and unexposed groups.

**Note:** An Explanation and Elaboration article discusses each checklist item and gives methodological background and published examples of transparent reporting. The STROBE checklist is best used in conjunction with this article (freely available on the Web sites of PLoS Medicine at <http://www.plosmedicine.org/>, Annals of Internal Medicine at <http://www.annals.org/>, and Epidemiology at <http://www.epidem.com/>). Information on the STROBE Initiative is available at [www.strobe-statement.org](http://www.strobe-statement.org).

# BMJ Open

## Factors associated with quality of life and work ability among Finnish municipal employees: a cross-sectional study

|                                 |                                                                                                                                                                                                                                                                                                                                                                                                                                                                         |
|---------------------------------|-------------------------------------------------------------------------------------------------------------------------------------------------------------------------------------------------------------------------------------------------------------------------------------------------------------------------------------------------------------------------------------------------------------------------------------------------------------------------|
| Journal:                        | <i>BMJ Open</i>                                                                                                                                                                                                                                                                                                                                                                                                                                                         |
| Manuscript ID                   | bmjopen-2019-035544.R2                                                                                                                                                                                                                                                                                                                                                                                                                                                  |
| Article Type:                   | Original research                                                                                                                                                                                                                                                                                                                                                                                                                                                       |
| Date Submitted by the Author:   | 15-May-2020                                                                                                                                                                                                                                                                                                                                                                                                                                                             |
| Complete List of Authors:       | Bergman, Elina; University of Turku, General Practice<br>Löyttyniemi, Eliisa; University of Turku, Department of Biostatistics<br>Myllyntausta, Saana; University of Turku, Department of Public Health<br>Rautava, Paivi; Turku University Hospital, Clinical Research Centre;<br>University of Turku Faculty of Medicine, Department of Public Health<br>Korhonen, Päivi; Turun Yliopisto, General Practice; Central Satakunta<br>Health Federation of Municipalities |
| <b>Primary Subject Heading</b>: | General practice / Family practice                                                                                                                                                                                                                                                                                                                                                                                                                                      |
| Secondary Subject Heading:      | Patient-centred medicine                                                                                                                                                                                                                                                                                                                                                                                                                                                |
| Keywords:                       | PRIMARY CARE, OCCUPATIONAL & INDUSTRIAL MEDICINE, PREVENTIVE MEDICINE                                                                                                                                                                                                                                                                                                                                                                                                   |
|                                 |                                                                                                                                                                                                                                                                                                                                                                                                                                                                         |

SCHOLARONE™  
Manuscripts



I, the Submitting Author has the right to grant and does grant on behalf of all authors of the Work (as defined in the below author licence), an exclusive licence and/or a non-exclusive licence for contributions from authors who are: i) UK Crown employees; ii) where BMJ has agreed a CC-BY licence shall apply, and/or iii) in accordance with the terms applicable for US Federal Government officers or employees acting as part of their official duties; on a worldwide, perpetual, irrevocable, royalty-free basis to BMJ Publishing Group Ltd ("BMJ") its licensees and where the relevant Journal is co-owned by BMJ to the co-owners of the Journal, to publish the Work in this journal and any other BMJ products and to exploit all rights, as set out in our [licence](#).

The Submitting Author accepts and understands that any supply made under these terms is made by BMJ to the Submitting Author unless you are acting as an employee on behalf of your employer or a postgraduate student of an affiliated institution which is paying any applicable article publishing charge ("APC") for Open Access articles. Where the Submitting Author wishes to make the Work available on an Open Access basis (and intends to pay the relevant APC), the terms of reuse of such Open Access shall be governed by a Creative Commons licence – details of these licences and which [Creative Commons](#) licence will apply to this Work are set out in our licence referred to above.

Other than as permitted in any relevant BMJ Author's Self Archiving Policies, I confirm this Work has not been accepted for publication elsewhere, is not being considered for publication elsewhere and does not duplicate material already published. I confirm all authors consent to publication of this Work and authorise the granting of this licence.

1  
2  
3  
4  
5  
6 **FACTORS ASSOCIATED WITH QUALITY OF LIFE AND WORK ABILITY AMONG FINNISH MUNICIPAL**  
7  
8 **EMPLOYEES: A CROSS-SECTIONAL STUDY**  
9

10  
11 Elina Bergman, MD<sup>a</sup>, Eliisa Löyttyniemi, MSc<sup>b</sup>, Saana Myllyntausta, MA<sup>c</sup>, Päivi Rautava, MD, PhD<sup>c d</sup>

12  
13  
14  
15 and Päivi E. Korhonen, MD, PhD <sup>a e</sup>  
16

17  
18 <sup>a</sup> Institute of Clinical Medicine, Department of General Practice, University of Turku and Turku  
19 University Hospital, Turku, Finland. <sup>b</sup> Department of Biostatistics, University of Turku, Turku,  
20 Finland. <sup>c</sup> Department of Public Health, University of Turku, and Turku University Hospital, Turku,  
21 Finland. <sup>d</sup> Clinical Research Centre, Turku University Hospital, Turku, Finland. <sup>e</sup> Central Satakunta  
22 Health Federation of Municipalities, Harjavalta, Finland.  
23  
24  
25  
26  
27  
28  
29  
30  
31  
32  
33  
34  
35  
36  
37  
38

39 Corresponding author:

40  
41  
42 Elina Bergman  
43

44  
45 Address:

46  
47  
48 Department of General Practice, Joukahaisenkatu 3-5, FI-20014 TURUN YLIOPISTO, FINLAND  
49

50  
51 Telephone: +358 50 307 4436  
52

53  
54 E-mail: [elkaro@utu.fi](mailto:elkaro@utu.fi)  
55

56  
57 Word count: 3904  
58  
59  
60



**ABSTRACT**

**Objectives:** Quality of life (QoL) and work ability are elementary parts in defining the well-being of an employed person. The aim of this study was to demonstrate factors associated with QoL and self-reported work ability among public sector employees, while taking into account several confounding factors, including sleep quality, occupational stress and psychological symptoms.

**Methods:** A cross-sectional study was conducted in Finland among 710 employees (89% women, mean age 49 [SD = 10] years) from ten municipal work units in 2015. Information about the participants was collected by physical examination, self-administered questionnaire and from medical history. QoL was assessed with the EUROHIS-QOL 8-item index and work ability with the Work Ability Score (WAS).

**Results:** The EUROHIS-QOL mean score among all participants was 4.07 (95% CI 4.03–4.11). QoL was positively associated with good sleep quality, cohabiting, university-level education, and lower BMI, and negatively associated with occupational stress, depression and/or anxiety and disease burden. Work ability was reported good or excellent by 80% of the participants and the WAS mean score among all participants was 8.31 (95% CI 8.21–8.41). Work ability was positively associated with good sleep quality, younger age, lower BMI and university-level education, and negatively associated with occupational stress and disease burden.

**Conclusions:** Occupational stress and self-reported sleep quality were strongly associated with both QoL and work ability among Finnish public sector employees. These findings highlight the need for screening and handling of work stress and sleep problems in occupational and primary health care.

**KEYWORDS**

Quality of life, Work ability, Occupational health, Sleep quality, Occupational stress

## STRENGTHS AND LIMITATIONS OF THIS STUDY

- Several aspects associated with the employees' quality of life and work ability could be taken into account.
- The participants completed all questionnaires at home before the examination was performed.
- Psychological symptoms were assessed with well-validated instruments.
- Any causality cannot be determined due to the cross-sectional nature of the study.
- The response rate of the study was moderate at most, which is a common limitation in e-mail surveys.

## INTRODUCTION

Quality of life (QoL) and work ability are elementary outcomes in defining the well-being of an employed person. Both of these can be affected by numerous conditions, including physical and mental health [1,2], occupational stress [3,4], sleep quality [5,6], psychosocial risk factors and environmental aspects. [7] Many of these can be measured reliably by evaluating the persons' perceptions about the condition with self-reported assessment tools. [1,8–13] In our previous study, especially self-reported sleep quality was strongly associated with QoL among public sector employees. [14]

QoL and work ability have been studied also previously in currently employed populations, but most of the studies have concentrated on a specific occupational group or employees suffering from a certain medical condition. [2,15,16] To our knowledge, there is a gap of information about factors associated with QoL and work ability, studied simultaneously among apparently healthy public sector employees. Public sector is a large employer sector in the Scandinavian countries, and it

1  
2  
3 would be important to recognize the factors associated with well-being of the employees in  
4  
5 municipal work places.  
6  
7

8 The aim of this study was to demonstrate factors associated with QoL and self-reported work ability  
9  
10 among public sector employees, while taking into account several confounding factors, including  
11  
12 psychological symptoms, sleep quality and occupational stress. We wanted to use short, subjective  
13  
14 and user-friendly tools for the assessment of QoL, work ability and sleep quality. These instruments  
15  
16 could easily be used for screening also in occupational and primary healthcare.  
17  
18  
19  
20  
21  
22

## 23 **PARTICIPANTS AND METHODS**

### 24 **Participants**

25  
26  
27  
28  
29 This cross-sectional study was part of the PORTAAT (PORi To Aid Against Threats) study conducted  
30  
31 among employees of the city of Pori (83,497 inhabitants in 2014) in South-Western Finland in 2014  
32  
33 and 2015. The participating work units were selected by the chief of the Welfare Unit of Pori.  
34

35  
36 Invitations to participate and information of the study were sent to employees via e-mail by the  
37  
38 managers of the selected ten work units (total number of employees 2,570). The employees willing  
39  
40 to participate contacted the study contact person at their work unit, who then sent their contact  
41  
42 information to the study nurse. There were no exclusion criteria. A total of 836 employees (104  
43  
44 males, 732 females) participated in the study in 2014. The response rate in 2014 was 32.5%.  
45  
46

47  
48 Complete information about data collection from that year has been described earlier. [17] All the  
49  
50 initial respondents were invited to the second part of the study in 2015, and 710 of them (79 males,  
51  
52 631 females) attended. In the present work, all the information is from the year 2015, and this data  
53  
54 was chosen, because complete information about psychosocial risk factors was available only from  
55  
56 that year. The gender distribution of the study participants corresponds to the standard gender  
57  
58 distribution of the employees of Pori. The participants' occupations included librarians, museum  
59  
60

1  
2  
3 employees, janitors, IT workers, social workers, nurses, physicians, administrative officials, and  
4  
5 general office staff. The involved employment sectors, reported according to the number of  
6  
7 employees participating in the study in 2015 were Health and Welfare (275 employees), Social Work  
8  
9 (198), Technical Services (143), Education and Culture (62) and Administration (32).

### 12 13 **Quality of life**

14  
15  
16 QoL was assessed with the EUROHIS-QOL 8-item index.[18] This is a shortened version of the  
17  
18 WHOQOL-Bref scale, a widely used instrument for the assessment of generic QoL.[7,19] The domains  
19  
20 in both questionnaires are the general, physical, psychological, social and environmental aspects of  
21  
22 QoL. The EUROHIS-QOL instrument has been validated in several European countries.[1] The  
23  
24 participants of the present study answered the questions at home before the study visits. Every  
25  
26 question was scored from 1 to 5 (1 for very poor and 5 for very good). All scores were then added  
27  
28 together and divided by 8 (the sum of the questions) to obtain the EUROHIS-QOL mean score.[1]  
29  
30  
31

### 32 33 **Work-related measures**

34  
35  
36 Work ability was assessed with the question “What is your current work ability compared to your  
37  
38 lifetime best?”. This is the first item of the widely used Work Ability Index (WAI) [9], referred to as  
39  
40 the Work Ability Score (WAS). It has a 0–10 response scale, where 0 stands for “completely unable to  
41  
42 work” and 10 stands for “work ability at its best”. Work ability was considered poor for scores of 0–  
43  
44 5, moderate for scores of 6–7, good for scores of 8–9, and excellent for a score of 10 points, based  
45  
46 on the same values that have been used in the WAI.[20] Work-related stress was evaluated with  
47  
48 Bergen Burnout Indicator 15 (BBI-15).[13] The BBI-15 measures three dimensions of burnout:  
49  
50 exhaustion, cynicism, and reduced professional efficacy. Responses are rated on a 6-point Likert-  
51  
52 type scale (1 = totally disagree, 6 = totally agree). In this work, we used the total score from all three  
53  
54 dimensions, which can vary from 15 to 90, with higher scores indicating more severe burnout  
55  
56 symptoms. Burnout symptoms are in this indicator classified as severe, moderate, mild, and no  
57  
58 burnout, with specific threshold values according to gender and age.[13] We assessed burnout as a  
59  
60

1  
2  
3 binary variable where all scores from mild to severe burnout were set to indicate the presence of  
4  
5 burnout symptoms.  
6  
7

### 8 **Sleep-related measures**

9  
10  
11 Self-reported sleep quality was assessed with the question “During the past month, how would you  
12  
13 rate your sleep quality overall?” (very good, good, poor, or very poor). In the analyses, the two  
14  
15 lowest classes of sleep quality were combined and set to indicate poor sleep quality. Sleep duration  
16  
17 was assessed with the question “During the past month, how many hours of sleep did you normally  
18  
19 get at night?”. The participants were asked to answer the question in a free field, and sleep duration  
20  
21 was handled as a continuous variable in the analyses. Both of these questions are items from the  
22  
23 well-validated Pittsburgh Sleep Quality Index (PSQI)[10], which has good internal consistency ( $\alpha =$   
24  
25 0.83) and test–retest reliability ( $r = 0.82$ ; over an average of 19 days). [21,22]  
26  
27  
28  
29

### 30 **Psychological symptoms**

31  
32  
33 Depressive symptoms were assessed with the Major Depression Inventory (MDI) questionnaire.[23]  
34  
35 This inventory can be used as a diagnostic tool for major depression (according to DSM IV diagnostic  
36  
37 criteria) as well as an assessment tool for severity of depressive symptoms.[11,23] To assess severity  
38  
39 of depressive symptoms, a total score of 0–20 is considered as no symptoms, 21–25 as mild  
40  
41 symptoms, 26–30 as moderate symptoms, and 31–50 as severe depressive symptoms. In this work,  
42  
43 the diagnostic tool was used to determine whether a person had depression or not. Anxiety was  
44  
45 assessed with the General Anxiety Disorder 7-item Scale (GAD-7).[12] In the GAD-7, a total score of  
46  
47 0–4 is considered as no anxiety, 5–9 as mild anxiety, 10–14 as moderate anxiety, and 15–21 as  
48  
49 severe anxiety. A total score of 10 was used as a cut-off point when a binary variable for anxiety was  
50  
51 used in our analyses. This cut-off is recommended by the developers of the GAD-7  
52  
53 questionnaire.[12] The participants with severe depressive or anxious symptoms were referred to  
54  
55 the occupational health care for further follow-up.  
56  
57  
58  
59  
60

## Other measures

Smoking status was assessed by a questionnaire. Non-smoking was defined as having never smoked or having quit smoking >12 months ago. Height and weight were measured by a study nurse with subjects in standing position without shoes and outer garments. Weight was measured to the nearest 0.1 kg with calibrated scales and height to the nearest 0.5 cm with a wall-mounted stadiometer. BMI was calculated as weight (kg) divided by the square of height (m<sup>2</sup>). Information concerning diseases diagnosed by a physician, medication used regularly, marital status (cohabiting or not), working times (3-shift work or not) and education level (vocational school, college-level education, or university-level education) was gathered using self-administered questionnaires and medical records. Alcohol consumption was assessed using the 3-item Alcohol Use Disorders Identification Test (AUDIT-C) [24] with a cut-off of 5 points for harmful alcohol use in women and 6 points in men.[25,26] Disease burden was defined as having at least one chronic disease diagnosed by a physician.

## Statistical analysis

Continuous variables are presented with means and standard deviations (SD) together with 95% confidence intervals (CI). Categorical variables are summarized with counts and percentages (%).

Association between sleep quality and background variables was evaluated using a chi-square test or a one-way analysis of variance (ANOVA).

Association between QoL / work ability and background variables including sleep quality were examined first one by one (univariate approach), with one-way analysis of variance or with linear regression. A multivariable model was then built up, and age, gender and all factors with significant association with QoL and / or work ability in the univariate approach were entered into the model.

The method used was linear model and assumptions were checked using studentized residuals.

1  
2  
3 All statistical tests were performed as 2-sided, with a significance level set at 0.05. The analyses were  
4 performed using an SAS System version 9.4 for Windows (SAS Institute Inc., Cary, NC, USA).  
5  
6  
7

### 8 **Patient and public involvement**

9  
10  
11 Information events about the PORTAAT Study with guidance for the management of physical and  
12 psychosocial well-being were arranged for the employees of the selected work units. All participants  
13 were given personalized lifestyle counselling at the study visits. The chief of the Welfare Unit of Pori  
14 has been informed regularly about the published study results. The participants of this study were  
15 not involved in the design or development of the study.  
16  
17  
18  
19  
20  
21  
22  
23  
24  
25  
26

### 27 **RESULTS**

28  
29 The study cohort consisted of 710 employees with a mean age of 49 years (SD 10, range 20 – 68),  
30 89% of whom were female.  
31  
32  
33

### 34 **Characteristics of the participants**

35  
36  
37 Table 1 displays the basic characteristics of all the participants, also classified according to their sleep  
38 quality. Sleep quality was reported very good by 14.5%, good by 62.1%, poor by 21.2%, and very  
39 poor by 2.1% of the participants. Poor and very poor sleep quality were combined and set to indicate  
40 poor sleep quality in the analyses. Self-reported sleep quality was negatively associated with disease  
41 burden, prevalence of depression and severity of depressive symptoms, anxiety, and work stress,  
42 and positively associated with QoL and work ability. Better sleep quality was associated with longer  
43 sleep duration ( $p < 0.0001$ ). There were only five participants with a previously diagnosed obstructive  
44 sleep apnoea and three with restless legs syndrome. During the past month, 14.8% of the  
45 participants had used sleep medication at least occasionally. The use of sleep medication was more  
46 common in women (15.1% in women vs. 12.6% in men,  $p = 0.038$ ).  
47  
48  
49  
50  
51  
52  
53  
54  
55  
56  
57  
58  
59  
60

1  
2  
3 Only 9 (1.3%) of the participants were diagnosed as depressive according to the MDI diagnostic tool.  
4

5 All of them were also classified as anxious (GAD-7 score > 10). The measures from these two  
6

7 psychological symptoms were combined for multivariable analyses.  
8  
9  
10  
11  
12  
13  
14  
15  
16  
17  
18  
19  
20  
21  
22  
23  
24  
25  
26  
27  
28  
29  
30  
31  
32  
33  
34  
35  
36  
37  
38  
39  
40  
41  
42  
43  
44  
45  
46  
47  
48  
49  
50  
51  
52  
53  
54  
55  
56  
57  
58  
59  
60

For peer review only



Table 1

Characteristics of all the participants and classified according to self-reported sleep quality

|                                     | All participants     | Sleep quality        |                      |                      | p-value |
|-------------------------------------|----------------------|----------------------|----------------------|----------------------|---------|
|                                     |                      | Very good (n=103)    | Good (n=441)         | Poor (n=166)         |         |
| Age mean, years (SD)                | 49.0 (9.7)           | 47.5 (10.6)          | 49.1 (9.7)           | 49.8 (9.2)           | 0.072   |
| Gender, n (%)                       |                      |                      |                      |                      | 0.10    |
| Female                              | 631 (88.9)           | 85 (13.5)            | 397 (62.9)           | 149 (23.6)           |         |
| Male                                | 79 (11.1)            | 18 (22.8)            | 44 (55.7)            | 17 (21.5)            |         |
| Education, n (%)                    |                      |                      |                      |                      | 0.36    |
| Vocational school                   | 21 (3)               | 4 (19.1)             | 14 (66.7)            | 3 (14.3)             |         |
| College-level                       | 361 (51.6)           | 53 (14.7)            | 232 (64.3)           | 76 (21.1)            |         |
| University-level                    | 318 (45.4)           | 45 (14.2)            | 188 (59.1)           | 85 (26.7)            |         |
| Co-habiting, n (%)                  |                      |                      |                      |                      | 0.64    |
| Yes                                 | 575 (81.2)           | 83 (14.4)            | 353 (61.4)           | 139 (24.2)           |         |
| No                                  | 133 (18.8)           | 20 (15.0)            | 86 (64.7)            | 27 (20.3)            |         |
| 3-shift work, n (%)                 |                      |                      |                      |                      | 0.41    |
| Yes                                 | 76 (10.9)            | 15 (19.7)            | 44 (57.9)            | 17 (23.4)            |         |
| No                                  | 620 (89.1)           | 87 (14.0)            | 386 (57.9)           | 147 (23.7)           |         |
| Smoking, n (%)                      |                      |                      |                      |                      | 0.45    |
| Yes                                 | 64 (9.0)             | 9 (14.1)             | 44 (68.8)            | 11 (17.2)            |         |
| No                                  | 645 (91.0)           | 94 (14.6)            | 396 (61.4)           | 155 (24.0)           |         |
| Harmful alcohol consumption, n (%)  |                      |                      |                      |                      | 0.55    |
| Yes                                 | 101 (14.2)           | 18 (17.8)            | 59 (58.4)            | 24 (23.8)            |         |
| No                                  | 609 (85.8)           | 85 (14.0)            | 382 (62.7)           | 142 (23.3)           |         |
| Body mass index mean (95% CI)       | 26.8 (26.42 - 27.13) | 26.4 (25.50 - 27.25) | 27.0 (26.54 - 27.46) | 26.5 (25.72 - 27.24) | 0.92    |
| Disease burden <sup>a</sup> , n (%) |                      |                      |                      |                      | 0.0016  |
| Yes                                 | 468 (65.9)           | 55 (11.8)            | 289 (61.8)           | 124 (26.5)           |         |
| No                                  | 242 (34.1)           | 48 (19.8)            | 152 (62.8)           | 42 (17.4)            |         |

|                                    |                    |                    |                     |                    |         |
|------------------------------------|--------------------|--------------------|---------------------|--------------------|---------|
| Depression (MDI), n (%)            |                    |                    |                     |                    | 0.016   |
| Yes                                | 9 (1.3)            | 0 (0.0)            | 3 (33.3)            | 6 (66.7)           |         |
| No                                 | 701 (98.7)         | 103 (14.7)         | 438 (62.5)          | 160 (22.8)         |         |
| MDI mean score (95% CI)            | 5.0 (4.57-5.43)    | 2.4 (1.75 - 2.97)  | 4.1 (3.59 - 4.51)   | 9.2 (8.09 - 10.27) | <0.0001 |
| Level of anxiety (GAD-7), n (%)    |                    |                    |                     |                    | <0.0001 |
| No anxiety                         | 534 (75.2)         | 92 (17.2)          | 343 (64.2)          | 99 (18.5)          |         |
| Mild anxiety                       | 143 (20.1)         | 10 (7.0)           | 85 (59.4)           | 48 (33.6)          |         |
| Moderate anxiety                   | 26 (3.7)           | 1 (3.9)            | 10 (38.5)           | 15 (57.7)          |         |
| Severe anxiety                     | 7 (1.0)            | 0 (0.0)            | 3 (42.9)            | 4 (57.1)           |         |
| BBI15 mean total score (95% CI)    | 31.6 (30.82-32.41) | 28.3 (26.43-30.23) | 31.0 (30.05- 31.99) | 35.4 (33.60-37.20) | <0.0001 |
| Occupational stress (BBI15), n (%) |                    |                    |                     |                    | <0.0001 |
| No stress                          | 592 (89.4)         | 97 (16.4)          | 374 (63.2)          | 121 (20.4)         |         |
| Stress                             | 70 (10.6)          | 3 (4.3)            | 38 (54.3)           | 29 (41.4)          |         |
| Sleep duration mean (95% CI)       | 7.00 (6.93 - 7.07) | 7.50 (7.35 - 7.66) | 7.17 (7.09 - 7.24)  | 6.23 (6.09 - 6.38) | <0.0001 |
| EUROHIS mean score (95% CI)        | 4.07 (4.03 - 4.11) | 4.38 (4.30 - 4.45) | 4.09 (4.05 - 4.14)  | 3.83 (3.75 - 3.91) | <0.0001 |
| WAS mean score (95% CI)            | 8.31 (8.21-8.41)   | 8.99 (8.78 - 9.20) | 8.34 (8.22 - 8.46)  | 7.80 (7.55 - 8.04) | <0.0001 |
| Level of work ability (WAS), n (%) |                    |                    |                     |                    | <0.0001 |
| Poor                               | 27 (3.8)           | 1 (3.7)            | 12 (44.4)           | 14 (51.9)          |         |
| Moderate                           | 114 (16.1)         | 3 (2.6)            | 69 (60.5)           | 42 (36.8)          |         |
| Good                               | 459 (64.9)         | 61 (13.3)          | 298 (64.9)          | 100 (21.8)         |         |
| Excellent                          | 107 (15.1)         | 37 (34.6)          | 60 (56.1)           | 10 (9.4)           |         |

<sup>a</sup> At least one chronic disease diagnosed by a physician, BBI15 = Bergen Burnout Indicator 15, CI = Confidence Interval, EUROHIS = EUROHIS-QOL 8-item index, GAD-7= General Anxiety Disorder 7-item Scale, MDI = Major Depression Inventory, SD = Standard deviation, WAS = Work Ability Score

### Quality of life

As seen in Table 2, the EUROHIS-QOL mean score among all participants was 4.07 (SD 0.51) with no significant difference between genders ( $p=0.94$ ). In the univariate approach, QoL was positively associated with good sleep quality, university-level education, co-habiting, lower BMI and younger age, and negatively associated with occupational stress, depression, anxiety and disease burden.

In the multiway analysis of co-variance, QoL was positively associated with good sleep quality, co-habiting, university-level education and lower BMI, and negatively associated with occupational stress, depression and/or anxiety and disease burden (Table 2).

Table 2

Factors associated with quality of life in a univariate approach and in a multivariable model. EUROHIS means/slope together with 95% CI are based on model estimates.

|                             | Univariate                 |                         |         | Multivariable                          |                         |         |    |         |
|-----------------------------|----------------------------|-------------------------|---------|----------------------------------------|-------------------------|---------|----|---------|
|                             | EUROHIS total mean / slope | 95% Confidence Interval | p-value | EUROHIS total model based mean / slope | 95% Confidence Interval | F-value | DF | p-value |
| Age                         | -0.0040                    | (-0.0079, -0.00008)     | 0.046   | -0.00028                               | -0.0042 - 0.0036        | 0.02    | 1  | 0.89    |
| Gender                      |                            |                         | 0.94    |                                        |                         | 0.00    | 1  | 0.99    |
| Female                      | 4.07                       | 4.03 - 4.11             |         | 3.54                                   | 3.38 - 3.69             |         |    |         |
| Male                        | 4.07                       | 3.96 - 4.18             |         | 3.54                                   | 3.36 - 3.72             |         |    |         |
| Education                   |                            |                         | 0.036   |                                        |                         | 4.17    | 2  | 0.016   |
| Vocational school           | 3.83                       | 3.61 - 4.05             |         | 3.37                                   | 3.11 - 3.62             |         |    |         |
| College-level               | 4.05                       | 4.00 - 4.11             |         | 3.59                                   | 3.44 - 3.74             |         |    |         |
| University-level            | 4.11                       | 4.05 - 4.16             |         | 3.66                                   | 3.51 - 3.81             |         |    |         |
| Co-habiting                 |                            |                         | 0.011   |                                        |                         | 5.72    | 1  | 0.017   |
| Yes                         | 4.09                       | 4.05 - 4.13             |         | 3.59                                   | 3.43 - 3.75             |         |    |         |
| No                          | 3.97                       | 3.88 - 4.06             |         | 3.48                                   | 3.31 - 3.66             |         |    |         |
| Smoking                     |                            |                         | 0.39    |                                        |                         |         |    |         |
| Yes                         | 4.02                       | 3.89 - 4.14             |         |                                        |                         |         |    |         |
| No                          | 4.08                       | 4.38 - 4.12             |         |                                        |                         |         |    |         |
| Harmful alcohol consumption |                            |                         | 0.33    |                                        |                         |         |    |         |
| Yes                         | 4.12                       | 4.02 - 4.22             |         |                                        |                         |         |    |         |
| No                          | 4.06                       | 4.02 - 4.11             |         |                                        |                         |         |    |         |
| Body mass index             | -0.020                     | (-0.028, -0.012)        | <0.0001 | -0.018                                 | (-0.025, -0.011)        | 23.91   | 1  | <0.0001 |
| Disease burden <sup>a</sup> |                            |                         | <0.0001 |                                        |                         | 13.35   | 1  | 0.0003  |
| Yes                         | 3.99                       | 3.95 - 4.04             |         | 3.47                                   | 3.31 - 3.63             |         |    |         |
| No                          | 4.22                       | 4.16 - 4.29             |         | 3.61                                   | 3.44 - 3.77             |         |    |         |
| Depression <sup>b</sup>     |                            |                         | <0.0001 |                                        |                         |         |    |         |
| Yes                         | 3.07                       | 2.74 - 3.39             |         |                                        |                         |         |    |         |

1  
2  
3  
4  
5  
6  
7  
8  
9  
10  
11  
12  
13  
14  
15  
16  
17  
18  
19  
20  
21  
22  
23  
24  
25  
26  
27  
28  
29  
30  
31  
32  
33  
34  
35  
36  
37  
38  
39  
40  
41  
42  
43  
44  
45  
46

|                                         |      |             |         |      |             |       |   |         |
|-----------------------------------------|------|-------------|---------|------|-------------|-------|---|---------|
| No                                      | 4.08 | 4.05 - 4.12 |         |      |             |       |   |         |
| Level of anxiety <sup>c</sup>           |      |             | <0.0001 |      |             |       |   |         |
| No                                      | 4.19 | 4.16 - 4.23 |         |      |             |       |   |         |
| Mild                                    | 3.75 | 3.67 - 3.82 |         |      |             |       |   |         |
| Moderate                                | 3.47 | 3.29 - 3.64 |         |      |             |       |   |         |
| Severe                                  | 3.66 | 3.32 - 4.00 |         |      |             |       |   |         |
| Depression and/or anxiety <sup>bd</sup> |      |             |         |      |             | 13.92 | 2 | <0.0001 |
| No depression/ No anxiety               |      |             |         | 3.89 | 3.77 - 4.00 |       |   |         |
| Only anxiety                            |      |             |         | 3.59 | 3.36 - 3.82 |       |   |         |
| Depression and anxiety                  |      |             |         | 3.14 | 2.81 - 3.46 |       |   |         |
| Occupational stress <sup>e</sup>        |      |             | <0.0001 |      |             | 39.30 | 1 | <0.0001 |
| Yes                                     | 3.63 | 3.51 - 3.74 |         | 3.35 | 3.18 - 3.53 |       |   |         |
| No                                      | 4.13 | 4.09 - 4.17 |         | 3.72 | 3.56 - 3.88 |       |   |         |
| 3-shift work                            |      |             | 0.089   |      |             | 0.55  | 1 | 0.46    |
| Yes                                     | 4.16 | 4.02 - 4.10 |         | 3.56 | 3.37 - 3.74 |       |   |         |
| No                                      | 4.06 | 4.05 - 4.28 |         | 3.52 | 3.36 - 3.67 |       |   |         |
| Self-reported sleep quality             |      |             | <0.0001 |      |             | 22.02 | 2 | <0.0001 |
| Very good                               | 4.38 | 4.30 - 4.45 |         | 3.74 | 3.56 - 3.92 |       |   |         |
| Good                                    | 4.05 | 4.05 - 4.14 |         | 3.53 | 3.36 - 3.69 |       |   |         |
| Poor                                    | 3.83 | 3.75 - 3.91 |         | 3.34 | 3.18 - 3.51 |       |   |         |

<sup>a</sup> At least one chronic disease diagnosed by a physician, <sup>b</sup> Defined by Major Depression Inventory (MDI) diagnostic tool (DSM IV), <sup>c</sup> General Anxiety Disorder 7-item Scale (GAD-7), <sup>d</sup> General Anxiety Disorder 7-item Scale (GAD-7), moderate or severe anxiety, <sup>e</sup> Bergen Burnout Indicator 15 (BBI15), at least mild occupational stress, CI = Confidence Interval, DF = Degrees of freedom, EUROHIS = EUROHIS-QOL 8-item index

### Work ability

Work ability was reported excellent by 15.2%, good by 64.9%, moderate by 16.1% and poor by 3.8% of the participants. The WAS mean score among all participants was 8.31 (SD 1.37), and the median was 9.0 (Q1:8.0, Q3:9.0). There was no difference in work ability between genders ( $p=0.11$ ). In the univariate approach, work ability was positively associated with good sleep quality, younger age, lower BMI, university-level education, female gender, and 3-shift work, and negatively associated with disease burden, depression, anxiety and occupational stress.

In the multiway analysis of co-variance, work ability was positively associated with good sleep quality, younger age, lower BMI, and university-level education, and negatively associated with occupational stress and disease burden (Table 3).

Table 3

Factors associated with work ability in a univariate approach and in a multivariable model. WAS means/slope together with 95% CI are based on model estimates.

|                             | Univariate           |                         |         | Multivariable                    |                         |         |    |         |
|-----------------------------|----------------------|-------------------------|---------|----------------------------------|-------------------------|---------|----|---------|
|                             | WAS estimate / slope | 95% Confidence Interval | p-value | WAS model based estimate / slope | 95% Confidence Interval | F-value | DF | p-value |
| Age                         | -0.019               | (-0.029, -0.0090)       | 0.0002  | -0.012                           | (-0.022, -0.0018)       | 5.34    | 1  | 0.021   |
| Gender                      |                      |                         | 0.027   |                                  |                         | 3.36    | 1  | 0.067   |
| Female                      | 8.35                 | 8.24 - 8.46             |         | 7.83                             | 7.43 - 8.23             |         |    |         |
| Male                        | 7.99                 | 7.68 - 8.29             |         | 7.56                             | 7.09 - 8.04             |         |    |         |
| Education                   |                      |                         | 0.0079  |                                  |                         | 4.74    | 2  | 0.0091  |
| Vocational school           | 7.90                 | 7.30 - 8.50             |         | 7.42                             | 6.76 - 8.07             |         |    |         |
| College-level               | 8.18                 | 8.04 - 8.32             |         | 7.70                             | 7.32 - 8.09             |         |    |         |
| University-level            | 8.48                 | 8.33 - 8.63             |         | 7.80                             | 7.58 - 8.37             |         |    |         |
| Co-habiting                 |                      |                         | 0.91    |                                  |                         | 0.04    | 1  | 0.85    |
| Yes                         | 8.31                 | 8.20 - 8.42             |         | 7.69                             | 7.27 - 8.10             |         |    |         |
| No                          | 8.30                 | 8.06 - 8.53             |         | 7.71                             | 7.26 - 8.18             |         |    |         |
| Smoking                     |                      |                         | 0.19    |                                  |                         |         |    |         |
| Yes                         | 8.10                 | 7.76 - 8.44             |         |                                  |                         |         |    |         |
| No                          | 8.33                 | 8.23 - 8.44             |         |                                  |                         |         |    |         |
| Harmful alcohol consumption |                      |                         | 0.35    |                                  |                         |         |    |         |
| Yes                         | 8.43                 | 8.18 - 8.40             |         |                                  |                         |         |    |         |
| No                          | 8.30                 | 8.16 - 8.70             |         |                                  |                         |         |    |         |
| Body mass index             | -0.036               | (-0.057, -0.016)        | 0.0006  | -0.023                           | (-0.042, -0.0041)       | 5.71    | 1  | 0.017   |
| Disease burden <sup>a</sup> |                      |                         | <0.0001 |                                  |                         | 12.23   | 1  | 0.0005  |
| Yes                         | 8.07                 | 7.95 - 8.20             |         | 7.52                             | 7.11 - 7.95             |         |    |         |
| No                          | 8.77                 | 8.60 - 8.93             |         | 7.87                             | 7.44 - 8.30             |         |    |         |
| Depression <sup>b</sup>     |                      |                         | 0.0083  |                                  |                         |         |    |         |

|    |                                         |      |             |         |      |             |       |         |
|----|-----------------------------------------|------|-------------|---------|------|-------------|-------|---------|
| 1  |                                         |      |             |         |      |             |       |         |
| 2  |                                         |      |             |         |      |             |       |         |
| 3  | Yes                                     | 7.11 | 6.22 - 8.01 |         |      |             |       |         |
| 4  | No                                      | 8.33 | 8.23 - 8.43 |         |      |             |       |         |
| 5  | Level of anxiety <sup>c</sup>           |      |             | <0.0001 |      |             |       |         |
| 6  | No                                      | 8.55 | 8.44 - 8.66 |         |      |             |       |         |
| 7  | Mild                                    | 7.59 | 7.38 - 7.81 |         |      |             |       |         |
| 8  | Moderate                                | 7.44 | 6.95 - 7.94 |         |      |             |       |         |
| 9  | Severe                                  | 8.00 | 7.03 - 8.97 |         |      |             |       |         |
| 10 | Depression and/or anxiety <sup>bd</sup> |      |             |         |      | 1.73        | 2     | 0.17    |
| 11 | No depression / No anxiety              |      |             |         | 8.02 | 7.72 - 8.31 |       |         |
| 12 | Only anxiety                            |      |             |         | 7.67 | 7.07 - 8.27 |       |         |
| 13 | Depression and anxiety                  |      |             |         | 7.41 | 6.57 - 8.25 |       |         |
| 14 | Occupational stress <sup>e</sup>        |      |             | <0.0001 |      |             | 29.80 | 1       |
| 15 | Yes                                     | 7.47 | 7.18 - 7.76 |         | 7.28 | 6.82 - 7.74 |       | <0.0001 |
| 16 | No                                      | 8.47 | 8.37 - 8.57 |         | 8.12 | 7.70 - 8.54 |       |         |
| 17 | 3-shift work                            |      |             | 0.0040  |      |             | 3.75  | 1       |
| 18 | Yes                                     | 8.74 | 8.43 - 9.05 |         | 7.84 | 7.36 - 8.33 |       | 0.053   |
| 19 | No                                      | 8.26 | 8.15 - 8.36 |         | 7.55 | 7.16 - 7.95 |       |         |
| 20 | Self-reported sleep quality             |      |             | <0.0001 |      |             | 14.44 | 2       |
| 21 | Very good                               | 9.00 | 8.73 - 9.25 |         | 8.13 | 7.66 - 8.60 |       | <0.0001 |
| 22 | Good                                    | 8.34 | 8.22 - 8.47 |         | 7.68 | 7.25 - 8.10 |       |         |
| 23 | Poor                                    | 7.80 | 7.59 - 8.00 |         | 7.29 | 6.86 - 7.72 |       |         |
| 24 |                                         |      |             |         |      |             |       |         |
| 25 |                                         |      |             |         |      |             |       |         |
| 26 |                                         |      |             |         |      |             |       |         |
| 27 |                                         |      |             |         |      |             |       |         |
| 28 |                                         |      |             |         |      |             |       |         |
| 29 |                                         |      |             |         |      |             |       |         |
| 30 |                                         |      |             |         |      |             |       |         |
| 31 |                                         |      |             |         |      |             |       |         |
| 32 |                                         |      |             |         |      |             |       |         |
| 33 |                                         |      |             |         |      |             |       |         |
| 34 |                                         |      |             |         |      |             |       |         |
| 35 |                                         |      |             |         |      |             |       |         |
| 36 |                                         |      |             |         |      |             |       |         |
| 37 |                                         |      |             |         |      |             |       |         |
| 38 |                                         |      |             |         |      |             |       |         |
| 39 |                                         |      |             |         |      |             |       |         |
| 40 |                                         |      |             |         |      |             |       |         |
| 41 |                                         |      |             |         |      |             |       |         |
| 42 |                                         |      |             |         |      |             |       |         |
| 43 |                                         |      |             |         |      |             |       |         |
| 44 |                                         |      |             |         |      |             |       |         |
| 45 |                                         |      |             |         |      |             |       |         |
| 46 |                                         |      |             |         |      |             |       |         |

<sup>a</sup> At least one chronic disease diagnosed by a physician, <sup>b</sup> Defined by Major Depression Inventory (MDI) diagnostic tool (DSM IV), <sup>c</sup> General Anxiety Disorder 7-item Scale (GAD-7), <sup>d</sup> General Anxiety Disorder 7-item Scale (GAD-7), moderate or severe anxiety, <sup>e</sup> Bergen Burnout Indicator 15 (BBI15), at least mild occupational stress, CI= Confidence Interval, DF = Degrees of freedom, WAS = Work Ability Score



## DISCUSSION

In this study, we managed to show that occupational stress, self-reported sleep quality, and disease burden were strongly associated with both QoL and work ability in public sector employees. In addition, QoL was tightly associated with BMI and depression and / or anxiety. To our knowledge, few studies have evaluated QoL and work ability simultaneously among apparently healthy, working-age individuals, with information about a wide range of factors potentially influencing these two variables.

Occupational stress was the factor most strongly associated with both QoL and work ability in this study. It is well known, that job strain is an important factor affecting employees' health and well-being.[3,27,28] Occupational stress is known to be associated, for example, with poor sleep quality [29], lower work ability [4] and mental health problems.[30] Furthermore, work stress was found to be associated with elevated mortality rates in patients with cardiometabolic disease in a large multicohort study.[31] Work stress has also been found to have a negative association with QoL in several studies.[3,27] The interesting finding in our study was that the association of occupational stress with QoL and WAS was strong, regardless of the fact that our study population had low rates of occupational stress. Only 10.6% of the participants in our study had at least mild occupational stress symptoms, and severe symptoms were very rare. It is thus possible that even low levels of occupational stress can have an important influence on a person's work ability and QoL. These results highlight the need for screening and handling of work stress among municipal employees.

Self-reported sleep quality was tightly associated with both QoL and work ability in this study. A negative association between poor sleep quality and QoL has previously been demonstrated among patients with sleep disorders and other medical conditions [32–35], and studies on shift workers have shown a clear association between sleep quality and QoL.[36,37] Furthermore, in a previous work on higher education students, Marques et al. showed that self-reported sleep quality remained a significant predictor of most aspects of QoL, regardless of the presence of psychopathological

1  
2  
3 symptoms, such as depression.[5] Sleep problems have in previous literature also been linked to  
4  
5 poorer work ability and an increased rate of sickness absence.[38,39] In addition, Ng et al. have  
6  
7 shown a positive association between good sleep quality and work ability among Hong Kong  
8  
9 construction workers.[6] However, in this study we managed to show that self-reported sleep quality  
10  
11 is significantly associated with both QoL and work ability among apparently healthy employees not  
12  
13 restricted to a specific occupation and working mainly in regular morning shifts. The associations  
14  
15 remained significant also in the multivariable models, where many potential confounding factors  
16  
17 could be taken into account.  
18  
19

20  
21 Disease burden, higher BMI and lower educational level were negatively associated with both QoL  
22  
23 and work ability in this study, as well as in previous literature. Chronic diseases are known to have a  
24  
25 negative association with QoL [1] and with work ability.[2,40] Lower BMI has been linked to better  
26  
27 QoL [41] and to better work ability [42,43], and higher education has been positively associated with  
28  
29 QoL [44] and with work ability.[45] In our study, as well as in previous literature, older age was  
30  
31 associated with poorer work ability [42,46], but no significant association was found between age  
32  
33 and QoL. This finding is consistent with the Finnish reference values for the EUROHIS-QOL 8-item  
34  
35 index.[47] Furthermore, cohabiting had a significant positive association with QoL in our study, as  
36  
37 has previously been observed in a population based study in Sweden.[48] Cohabiting has previously  
38  
39 been linked to better health and work ability, for example, in an unemployed population [49], but in  
40  
41 our setting, where only active work force was studied, there was no significant association between  
42  
43 cohabiting and work ability.  
44  
45  
46  
47  
48

49 An interesting finding in our study was that depression and / or anxiety was strongly associated with  
50  
51 QoL but did not have a significant association with work ability in the multivariable model.

52  
53 Depression and anxiety are known to have a negative impact on QoL [50–52], but depression also  
54  
55 affects a person's ability to work.[2,53] However, depression often leads to sickness absence, which  
56  
57 means that these people are not in the active work force. In our study population, depression and  
58  
59  
60

1  
2  
3 anxiety were relatively rare conditions, and most of the cases were mild. Only 9 (1.3%) of the  
4  
5 participants met the diagnostic criteria for major depression and 33 (4.6%) of the participants were  
6  
7 categorized as moderately or severely anxious. It is known that not all depressive patients consider  
8  
9 themselves unable to work.[53] These patients may benefit from the schedule and routine of work  
10  
11 life and do not want to seek sick leave, while depression still affects their QoL. In the Finnish Current  
12  
13 Care Guidelines for depression, sick leave is not recommended in mild depression and the need for  
14  
15 sick leave in moderate depression should be evaluated individually.[54] According to these  
16  
17 recommendations, those depressive patients whose work ability is not affected should remain in the  
18  
19 active work force. Furthermore, as the prevalence of depression and anxiety in our study population  
20  
21 was low, the generalizability of these results can be questioned.  
22  
23  
24  
25

26  
27 In this study, 3-shift work was not significantly associated either with QoL or with work ability in the  
28  
29 multivariable models. In the univariate approach, the work ability of the 3-shift workers was better  
30  
31 ( $p=0.0040$ ), but no significant difference was seen in QoL. Somewhat surprisingly, 3-shift work did  
32  
33 not seem to have any adverse effects on the participants' well-being in our study. There was no  
34  
35 difference in sleep quality or occupational stress compared to the regular morning shift workers.  
36  
37 Almost all 3-shift workers in our study were women working as nurses or social workers. Their mean  
38  
39 age was 45.6 years, which is 3.5 years younger than the mean age of the whole study population. In  
40  
41 addition to the younger age, one possible explanation for their well-being is that they may have  
42  
43 voluntarily chosen to work in shifts and feel that it is a suitable way of working for them. Those shift  
44  
45 workers who have had health problems or difficulties with sleep due to shift work may have changed  
46  
47 to day work.[55] Another unexpected result in this work was that harmful alcohol consumption did  
48  
49 not have adverse effects on sleep quality, QoL or work ability. However, even though there were 101  
50  
51 (14.2%) participants that fulfilled the definition of "harmful drinking" in the AUDIT-C, heavy drinking  
52  
53 was very rare in this predominantly female, active work force population. We assume that these  
54  
55 people may consume alcohol mainly during weekends, which diminishes the effects on everyday life  
56  
57 and work.  
58  
59  
60

1  
2  
3 We acknowledge some limitations of the study. We cannot determine the causality of the found  
4 associations because of the cross-sectional nature of the study. A possible healthy worker effect [56]  
5 can be present because only subjects in the active work force were studied. In addition, the initial  
6 response rate in the first part of the study in 2014 was only 32.5% (and 84.9% of them attended the  
7 study in 2015). It is known that response rates in e-mail surveys tend to be lower than in mail  
8 surveys [57], but it can nevertheless cause selection bias. It is possible that the healthiest part of the  
9 work force is also the most willing to attend voluntary health surveys, which may result in the  
10 possibility that our results reflect the situation in the mainly healthy section of the work force.  
11 However, the mean annual rate of sickness absence days did not vary significantly between the  
12 study participants and the non-participants on the included employment sectors. According to the  
13 records obtained from the city of Pori, the mean incidence of sickness absence days was 11 days per  
14 year among the study participants during the two year time period (2014 – 2015).[58] The mean  
15 sickness absence rate among all employees of the selected work units was 12 days according to the  
16 personnel report of the city of Pori in 2015. [59] The gender distribution in our study (89% females)  
17 resembles the distribution among employees of the city of Pori and is close to the gender  
18 distribution of the large Finnish prospective study on the public sector employees.[60] The  
19 information about alcohol consumption was collected by self-assessment, which may be influenced  
20 by social desirability. In addition, we unfortunately do not have data of possible menopausal  
21 symptoms, which may have affected our results in women.

22  
23  
24  
25  
26  
27  
28  
29  
30  
31  
32  
33  
34  
35  
36  
37  
38  
39  
40  
41  
42  
43  
44  
45  
46  
47  
48  
49  
50  
51  
52  
53  
54  
55  
56  
57  
58  
59  
60  
The strengths of our study are that we could take into account several aspects associated with the  
employees' QoL and work ability. All questionnaires were completed by the participants at home  
before the examination was performed. In this study, the approaches to sleep quality, QoL and work  
ability were all subjective, which emphasizes the importance of personal experience in evaluating  
these factors. We assessed self-reported sleep quality and work ability with single questions. This  
approach was chosen over longer questionnaires because a single question could also be used at a  
normal physician's appointment in primary or occupational health care for the evaluation of these

1  
2  
3 factors. The self-reported sleep quality question we used was from the Pittsburgh Sleep Quality  
4 Index (PSQI), and it has previously been shown to be closely related with QoL.[5] With this question  
5  
6 we showed a clear association of sleep quality with QoL and with work ability. However, it would be  
7  
8 interesting to further assess this connection in a similar population with a more detailed  
9  
10 questionnaire to determine whether the different components of sleep have different impacts on  
11  
12 QoL and work ability. The WAS score we used for the evaluation of work ability has been shown to  
13  
14 have a strong association with the Work Ability Index and is reliable in evaluating work ability.[61]  
15  
16 WAS has also been shown to predict disability pension and long-term sickness absence according to  
17  
18 a Finnish register-based study.[62] The associations of self-reported sleep quality with both QoL and  
19  
20 with work ability were clear and in line with previous literature even when studied with these simple  
21  
22 tools.  
23  
24  
25  
26  
27

## 28 **CONCLUSIONS**

29  
30  
31 In this paper we showed that occupational stress and self-reported sleep quality are strongly  
32  
33 associated with both QoL and work ability among Finnish public sector employees. According to our  
34  
35 results, even a low level of occupational stress has a significant negative association with QoL and  
36  
37 work ability. These findings highlight the need for screening and handling work stress and sleep  
38  
39 problems in occupational and primary health care. We suggests that short, self-reported assessment  
40  
41 tools could be used for this purpose.  
42  
43  
44  
45

## 46 **CONTRIBUTORS**

47  
48  
49 EB, EL, SM, PR and PK contributed to the conception or design of the work, and to the acquisition,  
50  
51 analysis or interpretation of data for the work. EB and PK drafted the manuscript. All authors  
52  
53 critically revised the manuscript, gave final approval, and agreed to be accountable for all aspects of  
54  
55 work ensuring integrity and accuracy.  
56  
57

## 58 **ACKNOWLEDGEMENTS**

1  
2  
3 Not applicable.  
4  
5

## 6 **FUNDING**

7  
8  
9 This study was supported by the Hospital District of Satakunta, the Hospital District of Southwest  
10  
11 Finland and Etera Mutual Pension Insurance Company.  
12  
13

## 14 **DECLARATION OF COMPETING INTERESTS**

15  
16  
17 The authors declare that they have no competing interests.  
18  
19

## 20 **ETHICAL APPROVAL**

21  
22  
23 All procedures performed in studies involving human participants were in accordance with the  
24  
25 ethical standards of the institutional and/or national research committee and with the 1964 Helsinki  
26  
27 Declaration and its later amendments or comparable ethical standards. The study protocol and  
28  
29 consent forms were reviewed and approved by the Ethics Committee of the Hospital District of  
30  
31 Southwest Finland (ETMK 43/180/2013).  
32  
33  
34

## 35 **INFORMED CONSENT**

36  
37  
38 Written informed consent was obtained from all individual participants included in the study.  
39  
40  
41

## 42 **AVAILABILITY OF DATA**

43  
44  
45 The datasets used and/or analysed during the current study are available from the corresponding  
46  
47 author on request.  
48  
49

## 50 **REFERENCES**

- 51  
52  
53 1 Schmidt S, Mühlan H, Power M. The EUROHIS-QOL 8-item index: Psychometric results of a  
54  
55 cross-cultural field study. *Eur J Public Health* 2006;**16**:420–8. doi:10.1093/eurpub/cki155  
56  
57  
58 2 Leino-Arjas P, Kaila-Kangas L, Heliövaara M, *et al.* The Relation of Co-occurring  
59  
60

- 1  
2  
3 Musculoskeletal Pain and Depressive Symptoms With Work Ability. *J Occup Environ Med*  
4  
5 2013;**55**:1281–5. doi:10.1097/jom.0b013e3182a4ffc4  
6  
7
- 8 3 Sarafis P, Rousaki E, Tsounis A, *et al.* The impact of occupational stress on nurses' caring  
9 behaviors and their health related quality of life. *BMC Nurs* 2016;**15**:1–9.  
10  
11 doi:10.1186/s12912-016-0178-y  
12  
13  
14
- 15 4 Yong M, Nasterlack M, Pluto R-P, *et al.* Occupational stress perception and its potential  
16 impact on work ability. *Work* Published Online First: 2013. doi:10.3233/WOR-121556  
17  
18  
19
- 20 5 Marques DR, Meia-Via AMS, da Silva CF, *et al.* Associations between sleep quality and  
21 domains of quality of life in a non-clinical sample: results from higher education students.  
22  
23 *Sleep Heal* 2017;**3**:348–56. doi:10.1016/j.sleh.2017.07.004  
24  
25  
26
- 27 6 Ng JYK, Chan AHS. The work ability of Hong Kong construction workers in relation to  
28 individual and work-related factors. *Int J Environ Res Public Health* 2018;**15**.  
29  
30  
31  
32  
33  
34  
35  
36  
37  
38  
39  
40  
41
- 42 8 Idler EL, Benyamini Y. Self-rated health and mortality: a review of twenty-seven community  
43 studies. *J Health Soc Behav* 1997;**38**:21–37. <http://www.ncbi.nlm.nih.gov/pubmed/9097506>  
44  
45  
46  
47  
48  
49  
50  
51  
52  
53  
54
- 55 10 Buysse DJ, Reynolds CF, Monk TH, *et al.* The Pittsburgh sleep quality index: A new instrument  
56 for psychiatric practice and research. *Psychiatry Res* Published Online First: 1989.  
57  
58  
59  
60  
61

- 1  
2  
3 11 Bech P, Timmerby N, Martiny K, *et al.* Psychometric evaluation of the Major Depression  
4 Inventory ( MDI ) as depression severity scale using the LEAD ( Longitudinal Expert  
5 Assessment of All Data ) as index of validity. *BMC Psychiatry* 2015;:1–7. doi:10.1186/s12888-  
6 015-0529-3  
7  
8  
9  
10  
11  
12  
13 12 Spitzer RL, Kroenke K, Williams JBW, *et al.* A Brief Measure for Assessing Generalized Anxiety  
14 Disorder. 2006;**166**:1092–7.  
15  
16  
17  
18 13 Näätänen P, Aro A, Mathiesen SB, *et al.* *Bergen Burnout Indicator 15*. Helsinki: : Edita 2003.  
19  
20  
21 14 Bergman E, Löyttyniemi E, Rautava P, *et al.* Ideal cardiovascular health and quality of life  
22 among Finnish municipal employees. *Prev Med Reports* 2019;**15**:100922.  
23 doi:10.1016/j.pmedr.2019.100922  
24  
25  
26  
27  
28 15 Chiu MC, Wang MJJ, Lu CW, *et al.* Evaluating work ability and quality of life for clinical nurses  
29 in Taiwan. *Nurs Outlook* 2007;**55**:318–26. doi:10.1016/j.outlook.2007.07.002  
30  
31  
32  
33  
34 16 Sörensen LE, Pekkonen MM, Männikkö KH, *et al.* Associations between work ability, health-  
35 related quality of life, physical activity and fitness among middle-aged men. *Appl Ergon*  
36 2008;**39**:786–91. doi:10.1016/j.apergo.2007.11.001  
37  
38  
39  
40  
41 17 Veromaa V, Kautiainen H, Saxen U, *et al.* Ideal cardiovascular health and psychosocial risk  
42 factors among Finnish female municipal workers. *Scand J Public Health* 2017;**45**:50–6.  
43 doi:10.1177/1403494816677661  
44  
45  
46  
47  
48  
49 18 Power M. Development of A Common Instrument for Quality of Life. *EUROHIS Dev Common*  
50 *Instruments Heal Surv* 2003;**57**:145–  
51 59.[http://www.euro.who.int/en/publications/abstracts/eurohis-developing-common-](http://www.euro.who.int/en/publications/abstracts/eurohis-developing-common-instruments-for-health-surveys)  
52  
53  
54  
55  
56  
57  
58  
59 19 WHOQOL Group. the World Health Organization Quality of Life Assessment (Whoqol):  
60



- 1  
2  
3 Development and General Psychometric Properties\* the Whoqol Group{. *Soc Sci Med*  
4  
5 1998;**46**:1569–85. doi:10.1016/S0277-9536(98)00009-4  
6  
7  
8  
9 20 Gould R, Ilmarinen J, Jarvisalo J, *et al.* *Dimensions of Work Ability*. 2008.  
10  
11 doi:10.1108/02656710210415668  
12  
13  
14 21 Carpenter JS, Andrykowski MA. Psychometric evaluation of the Pittsburgh Sleep Quality  
15  
16 Index. *J Psychosom Res* Published Online First: 1998. doi:10.1016/S0022-3999(97)00298-5  
17  
18  
19 22 Gentili A, Weiner DK, Kuchibhatla M, *et al.* The Test-retest reliability of the Pittsburgh Sleep  
20  
21 Quality Index in nursing home residents. 1995;**43**:1317–8.  
22  
23  
24 23 Bech P, Rasmussen NA, Olsen LR, *et al.* The sensitivity and specificity of the Major Depression  
25  
26 Inventory, using the Present State Examination as the index of diagnostic validity. *J Affect*  
27  
28 *Disord* 2001;**66**:159–64. doi:10.1016/S0165-0327(00)00309-8  
29  
30  
31  
32 24 Bush K, Kivlahan DR, McDonell MB, *et al.* The AUDIT alcohol consumption questions (AUDIT-  
33  
34 C). *Arch Intern Med* 1998;**158**:1789–95. doi:10.1097/00000374-199811000-00034  
35  
36  
37 25 Aalto M, Tuunanen M, Sillanaukee P, *et al.* Effectiveness of structured questionnaires for  
38  
39 screening heavy drinking in middle-aged women. *Alcohol Clin Exp Res* 2006;**30**:1884–8.  
40  
41 doi:10.1111/j.1530-0277.2006.00233.x  
42  
43  
44  
45 26 Tuunanen M, Aalto M, Seppä K. Binge drinking and its detection among middle-aged men  
46  
47 using AUDIT, AUDIT-C and AUDIT-3. *Drug Alcohol Rev* 2007;**26**:295–9.  
48  
49 doi:10.1080/09595230701247756  
50  
51  
52 27 Yang X, Ge C, Hu B, *et al.* Relationship between quality of life and occupational stress among  
53  
54 teachers. *Public Health* 2009;**123**:750–5. doi:10.1016/j.puhe.2009.09.018  
55  
56  
57 28 Lerner DJ, Levine S, Malspeis S, *et al.* Job strain and health-related quality of life in a national  
58  
59 sample. *Am J Public Health* 1994;**84**:1580–5. doi:10.2105/AJPH.84.10.1580  
60

- 1  
2  
3 29 Knudsen HK, Ducharme LJ, Roman PM. Job stress and poor sleep quality: Data from an  
4 American sample of full-time workers. *Soc Sci Med* 2007;**64**:1997–2007.  
5  
6 doi:10.1016/j.socscimed.2007.02.020  
7  
8  
9  
10  
11 30 Chen W-Q, Wong T-W, Yu T-S. Review Article: Influence of occupational stress on mental  
12 health among Chinese off-shore oil workers. *Scand J Soc Med* 2009;**37**:766–73.  
13  
14 doi:10.1177/1403494809341097  
15  
16  
17  
18 31 Kivimäki M, Pentti J, Ferrie JE, *et al*. Work stress and risk of death in men and women with  
19 and without cardiometabolic disease: a multicohort study. *Lancet Diabetes Endocrinol*  
20 2018;**7**–9. doi:10.1016/S2213-8587(18)30140-2  
21  
22  
23  
24  
25 32 LeBlanc M, Beaulieu-Bonneau S, Mérette C, *et al*. Psychological and health-related quality of  
26 life factors associated with insomnia in a population-based sample. *J Psychosom Res*  
27 2007;**63**:157–66. doi:10.1016/j.jpsychores.2007.03.004  
28  
29  
30  
31  
32  
33 33 Reimer MA, Flemons WW. Quality of life in sleep disorders. *Sleep Med Rev* 2003;**7**:335–49.  
34  
35 doi:10.1053/smr.2001.0220  
36  
37  
38  
39 34 Liu L, Fiorentino L, Rissling M, *et al*. Decreased Health-Related Quality of Life in Women With  
40 Breast Cancer Is Associated With Poor Sleep. *Behav Sleep Med* 2013;**11**:189–206.  
41  
42 doi:10.1080/15402002.2012.660589  
43  
44  
45  
46 35 Liu J-C, Hung H-L, Shyu Y-K, *et al*. The Impact of Sleep Quality and Daytime Sleepiness on  
47 Global Quality of Life in Community-Dwelling Patients With Heart Failure. *J Cardiovasc Nurs*  
48 2011;**24**:99–105. doi:10.1097/JCN.0b013e3181ed7d12  
49  
50  
51  
52  
53 36 Palhares V de C, Corrente JE, Matsubara BB. Association between sleep quality and quality of  
54 life in nursing professionals working rotating shifts. *Rev Saude Publica* 2014;**48**:594–601.  
55  
56 doi:10.1590/S0034-8910.2014048004939  
57  
58  
59  
60

- 1  
2  
3 37 Nena E, Katsaouni M, Steiropoulos P, *et al.* Effect of Shift Work on Sleep , Health , and Quality  
4 of Life of Health-care Workers. *Indian J Occup Env Med* 2018;**22**:29–34.  
5  
6  
7  
8 doi:10.4103/ijoem.IJOEM  
9  
10  
11 38 Lallukka T, Kaikkonen R, Härkänen T, *et al.* Sleep and Sickness Absence: A Nationally  
12 Representative Register-Based Follow-Up Study. *Sleep* 2014;**37**:1413–25.  
13  
14  
15  
16 doi:10.5665/sleep.3986  
17  
18  
19 39 Lian Y, Xiao J, Liu Y, *et al.* Associations between insomnia, sleep duration and poor work  
20 ability. *J Psychosom Res* 2015;**78**:45–51. doi:10.1016/j.jpsychores.2014.09.009  
21  
22  
23  
24 40 Jędryka-Góral A, Bownik I, Michalak JM, *et al.* Work Ability in Ageing Workers Suffering From  
25 Chronic Diseases. *Int J Occup Saf Ergon* 2015;**12**:17–30.  
26  
27  
28  
29 doi:10.1080/10803548.2006.11076665  
30  
31  
32 41 Kroes M, Osei-Assibey G, Baker-Searle R, *et al.* Impact of weight change on quality of life in  
33 adults with overweight/obesity in the United States: a systematic review. *Curr Med Res Opin*  
34  
35  
36  
37  
38  
39 42 Bridger RS, Bennett AI. Age and BMI interact to determine work ability in seafarers. *Occup*  
40  
41  
42  
43  
44 43 Andersen LL, Izquierdo M, Sundstrup E. Overweight and obesity are progressively associated  
45  
46  
47  
48  
49  
50  
51  
52  
53  
54 44 Mielck A, Reitmeir P, Vogelmann M, *et al.* Impact of educational level on health-related  
55  
56  
57  
58  
59  
60

- 1  
2  
3 45 Martimo KP, Varonen H, Husman K, *et al.* Factors associated with self-assessed work ability.  
4  
5 *Occup Med (Chic Ill)* 2007;**57**:380–2. doi:10.1093/occmed/kqm028  
6  
7  
8  
9 46 Pohjonen T. Perceived work ability of home care workers in relation to individual and work-  
10 related factors in different age groups. *Occup Med (Chic Ill)* 2001;**51**:209–17.  
11  
12 doi:10.1093/occmed/51.3.209  
13  
14  
15  
16 47 Koskinen S, Lundqvist A, Ristiluoma N. *Terveys, toimintakyky ja hyvinvointi Suomessa 2011.*  
17  
18 2012.  
19  
20 [http://www.julkari.fi/bitstream/handle/10024/90832/Rap068\\_2012\\_netti.pdf?sequence=1](http://www.julkari.fi/bitstream/handle/10024/90832/Rap068_2012_netti.pdf?sequence=1)  
21  
22  
23  
24 48 Helena Michelson, Christina Bolund,. Health-related Quality of Life Measured by the EORTC  
25  
26 QLQ-C30: Reference Values From a Large Sample of the Swedish Population. *Acta Oncol*  
27  
28 *(Madr)* 2002;**39**:477–84. doi:10.1080/028418600750013384  
29  
30  
31  
32 49 Hult M, Pietilä AM, Koponen P, *et al.* Association between good work ability and health  
33 behaviours among unemployed: A cross-sectional survey. *Appl Nurs Res* 2018;**43**:86–92.  
34  
35 doi:10.1016/j.apnr.2018.07.008  
36  
37  
38  
39 50 Saarni SI, Suvisaari J, Sintonen H, *et al.* Impact of psychiatric disorders on health-related  
40 quality of life: General population survey. *Br J Psychiatry* 2007;**190**:326–32.  
41  
42 doi:10.1192/bjp.bp.106.025106  
43  
44  
45  
46 51 Palacin C, Martinez-Alonso M, Codony M, *et al.* Use of mental health services in Europe:  
47 results from the European Study of the Epidemiology of Mental Disorders (ESEMeD) project.  
48  
49 *Acta Psychiatr Scand* 2004;**109**:47–54. doi:10.1111/j.1600-0047.2004.00330.x  
50  
51  
52  
53  
54 52 Da Rocha NS, Power MJ, Bushnell DM, *et al.* The EUROHIS-QOL 8-item index: Comparative  
55 psychometric properties to its parent WHOQOL-BREF. *Value Heal* 2012;**15**:449–57.  
56  
57 doi:10.1016/j.jval.2011.11.035  
58  
59  
60

- 1  
2  
3 53 Elinson L, Houck P, Marcus SC, *et al.* Depression and the Ability to Work. *Psychiatr Serv*  
4  
5 2003;**55**:29–34. doi:10.1176/appi.ps.55.1.29  
6  
7  
8  
9 54 Isometsä E, Kinnunen E, Kivekäs T, *et al.* Depression. Current Care Guidelines. Working group  
10 set up by the Finnish Medical Society Duodecim and the Finnish Psychiatric Association.  
11 Finnish Curr. Care Guidel. 2016.www.kaypahoito.fi (accessed 5 Sep 2019).  
12  
13  
14  
15  
16 55 Linton SJ, Kecklund G, Franklin KA, *et al.* The effect of the work environment on future sleep  
17 disturbances: A systematic review. *Sleep Med Rev* 2015;**23**:10–9.  
18 doi:10.1016/j.smrv.2014.10.010  
19  
20  
21  
22  
23 56 Li C, Sung E. A review of the healthy worker effect in occupational epidemiology. *Occup Med*  
24 (*Chic Ill*) 1999;**49**:225–9.  
25  
26  
27  
28  
29 57 Shih T, Fan X. Comparing response rates in e-mail and paper surveys : A meta-analysis. *Educ*  
30 *Res Rev* 2009;**4**:26–40. doi:10.1016/j.edurev.2008.01.003  
31  
32  
33  
34 58 Vuorio T, Suominen S, Kautiainen H, *et al.* Determinants of sickness absence rate among  
35 Finnish municipal employees. *Scand J Prim Health Care* 2019;**37**:3–9.  
36 doi:10.1080/02813432.2019.1568710  
37  
38  
39  
40  
41  
42 59 Porin kaupunki Henkilöstöraportti 2015. 2015.https://docplayer.fi/28278945-Porin-kaupunki-  
43 henkilöstöraportti-2015.html  
44  
45  
46  
47 60 Kouvonen A, Kivimäki M, Väänänen A, *et al.* Job strain and adverse health behaviors: The  
48 Finnish public sector study. *J Occup Environ Med* 2007;**49**:68–74.  
49 doi:10.1097/JOM.0b013e31802db54a  
50  
51  
52  
53  
54 61 Fassi M El, Bocquet V, Majery N, *et al.* Work ability assessment in a worker population :  
55 comparison and determinants of Work Ability Index and Work Ability score. *BMC Public*  
56 *Health* 2013;**13**:1–10.  
57  
58  
59  
60

- 1  
2  
3 62 Kinnunen U, Nätti J. Work ability score and future work ability as predictors of register-based  
4 disability pension and long-term sickness absence: A three-year follow-up study. *Scand J*  
5  
6  
7 *Public Health* 2018;**46**:321–30. doi:10.1177/1403494817745190  
8  
9  
10  
11  
12  
13  
14  
15  
16  
17  
18  
19  
20  
21  
22  
23  
24  
25  
26  
27  
28  
29  
30  
31  
32  
33  
34  
35  
36  
37  
38  
39  
40  
41  
42  
43  
44  
45  
46  
47  
48  
49  
50  
51  
52  
53  
54  
55  
56  
57  
58  
59  
60

For peer review only

1  
2  
3  
4  
5  
6  
7  
8  
9  
10  
11  
12  
13  
14  
15  
16  
17  
18  
19  
20  
21  
22  
23  
24  
25  
26  
27  
28  
29  
30  
31  
32  
33  
34  
35  
36  
37  
38  
39  
40  
41  
42  
43  
44  
45  
46  
47  
48  
49  
50  
51  
52  
53  
54  
55  
56  
57  
58  
59  
60STROBE Statement—Checklist of items that should be included in reports of *cross-sectional studies*

|                              | <b>Item No</b> | <b>Recommendation</b>                                                                                                                                                                                                                                                                                                                                                                                         |
|------------------------------|----------------|---------------------------------------------------------------------------------------------------------------------------------------------------------------------------------------------------------------------------------------------------------------------------------------------------------------------------------------------------------------------------------------------------------------|
| <b>Title and abstract</b>    | 1              | (a) Indicate the study's design with a commonly used term in the title or the abstract<br>(b) Provide in the abstract an informative and balanced summary of what was done and what was found                                                                                                                                                                                                                 |
| <b>Introduction</b>          |                |                                                                                                                                                                                                                                                                                                                                                                                                               |
| Background/rationale         | 2              | Explain the scientific background and rationale for the investigation being reported                                                                                                                                                                                                                                                                                                                          |
| Objectives                   | 3              | State specific objectives, including any prespecified hypotheses                                                                                                                                                                                                                                                                                                                                              |
| <b>Methods</b>               |                |                                                                                                                                                                                                                                                                                                                                                                                                               |
| Study design                 | 4              | Present key elements of study design early in the paper                                                                                                                                                                                                                                                                                                                                                       |
| Setting                      | 5              | Describe the setting, locations, and relevant dates, including periods of recruitment, exposure, follow-up, and data collection                                                                                                                                                                                                                                                                               |
| Participants                 | 6              | (a) Give the eligibility criteria, and the sources and methods of selection of participants                                                                                                                                                                                                                                                                                                                   |
| Variables                    | 7              | Clearly define all outcomes, exposures, predictors, potential confounders, and effect modifiers. Give diagnostic criteria, if applicable                                                                                                                                                                                                                                                                      |
| Data sources/<br>measurement | 8*             | For each variable of interest, give sources of data and details of methods of assessment (measurement). Describe comparability of assessment methods if there is more than one group                                                                                                                                                                                                                          |
| Bias                         | 9              | Describe any efforts to address potential sources of bias                                                                                                                                                                                                                                                                                                                                                     |
| Study size                   | 10             | Explain how the study size was arrived at                                                                                                                                                                                                                                                                                                                                                                     |
| Quantitative variables       | 11             | Explain how quantitative variables were handled in the analyses. If applicable, describe which groupings were chosen and why                                                                                                                                                                                                                                                                                  |
| Statistical methods          | 12             | (a) Describe all statistical methods, including those used to control for confounding<br>(b) Describe any methods used to examine subgroups and interactions<br>(c) Explain how missing data were addressed<br>(d) If applicable, describe analytical methods taking account of sampling strategy<br>(e) Describe any sensitivity analyses                                                                    |
| <b>Results</b>               |                |                                                                                                                                                                                                                                                                                                                                                                                                               |
| Participants                 | 13*            | (a) Report numbers of individuals at each stage of study—eg numbers potentially eligible, examined for eligibility, confirmed eligible, included in the study, completing follow-up, and analysed<br>(b) Give reasons for non-participation at each stage<br>(c) Consider use of a flow diagram                                                                                                               |
| Descriptive data             | 14*            | (a) Give characteristics of study participants (eg demographic, clinical, social) and information on exposures and potential confounders<br>(b) Indicate number of participants with missing data for each variable of interest                                                                                                                                                                               |
| Outcome data                 | 15*            | Report numbers of outcome events or summary measures                                                                                                                                                                                                                                                                                                                                                          |
| Main results                 | 16             | (a) Give unadjusted estimates and, if applicable, confounder-adjusted estimates and their precision (eg, 95% confidence interval). Make clear which confounders were adjusted for and why they were included<br>(b) Report category boundaries when continuous variables were categorized<br>(c) If relevant, consider translating estimates of relative risk into absolute risk for a meaningful time period |
| Other analyses               | 17             | Report other analyses done—eg analyses of subgroups and interactions, and sensitivity analyses                                                                                                                                                                                                                                                                                                                |

|                          |    |                                                                                                                                                                            |
|--------------------------|----|----------------------------------------------------------------------------------------------------------------------------------------------------------------------------|
| <b>Discussion</b>        |    |                                                                                                                                                                            |
| Key results              | 18 | Summarise key results with reference to study objectives                                                                                                                   |
| Limitations              | 19 | Discuss limitations of the study, taking into account sources of potential bias or imprecision. Discuss both direction and magnitude of any potential bias                 |
| Interpretation           | 20 | Give a cautious overall interpretation of results considering objectives, limitations, multiplicity of analyses, results from similar studies, and other relevant evidence |
| Generalisability         | 21 | Discuss the generalisability (external validity) of the study results                                                                                                      |
| <b>Other information</b> |    |                                                                                                                                                                            |
| Funding                  | 22 | Give the source of funding and the role of the funders for the present study and, if applicable, for the original study on which the present article is based              |

\*Give information separately for exposed and unexposed groups.

**Note:** An Explanation and Elaboration article discusses each checklist item and gives methodological background and published examples of transparent reporting. The STROBE checklist is best used in conjunction with this article (freely available on the Web sites of PLoS Medicine at <http://www.plosmedicine.org/>, Annals of Internal Medicine at <http://www.annals.org/>, and Epidemiology at <http://www.epidem.com/>). Information on the STROBE Initiative is available at [www.strobe-statement.org](http://www.strobe-statement.org).
